# Supplementary material for: Catalytic asymmetric synthesis of chiral phenols in ethanol with recyclable rhodium catalyst
Source: Royal Society of Chemistry journal article supplement (doi:10.1039/c9gc02420d), 2019-01-01

## Supporting Information

### Catalytic asymmetric synthesis of chiral phenols in ethanol with recyclable rhodium catalyst

Jian Yao, Na Liu, Long Yin, Junhao Xing, Tao Lu and Xiaowei Dou\*

Department of Chemistry and State Key Laboratory of Natural Medicines, China Pharmaceutical  
University, Nanjing 211198, China

Email: dxw@cpu.edu.cn

## Contents

|                                          |     |
|------------------------------------------|-----|
| 1. General Information.....              | S2  |
| 2. Materials .....                       | S2  |
| 3. A General Procedure for Table 1 ..... | S3  |
| 4. Procedures for Table 2 & Table 3..... | S3  |
| 5. Procedures for Scheme 2 .....         | S4  |
| 6. Procedures for Scheme 3 .....         | S7  |
| 7. Procedures for Scheme 4 .....         | S7  |
| 8. Characterization of the Products..... | S9  |
| 9. References.....                       | S25 |
| 10. NMR Spectra .....                    | S26 |
| 11. HPLC Charts.....                     | S68 |

## 1. General Information

All air-sensitive manipulations were carried out with standard Schlenk techniques under nitrogen or argon. NMR spectra were recorded on Bruker AVANCE AV-500 spectrometer (500 MHz for  $^1\text{H}$ , 125 MHz for  $^{13}\text{C}$ ), Bruker AVANCE AV-400 spectrometer (400 MHz for  $^1\text{H}$ , 101 MHz for  $^{13}\text{C}$ ) or Bruker AVANCE AV-300 spectrometer (300 MHz for  $^1\text{H}$ , 75 MHz for  $^{13}\text{C}$ ). Chemical shifts were reported in  $\delta$  (ppm) referenced to the residual solvent peak of  $\text{CDCl}_3$  ( $\delta$  7.26) for  $^1\text{H}$  NMR and  $\text{CDCl}_3$  ( $\delta$  77.0) for  $^{13}\text{C}$  NMR. Multiplicity was indicated as follows: s (singlet), d (doublet), t (triplet), q (quartet), m (multiplet), br (broad). Coupling constants were reported in Hertz (Hz). Specific rotations were measured on an ANTON PAAR MCP 100 automatic polarimeter. High resolution mass spectra (HRMS) were obtained on Thermo Scientific LTQ Orbitrap XL (ESI). For thin layer chromatography (TLC), Yantai pre-coated TLC plates (HSGF 254) were used, and compounds were visualized with a UV light at 254 nm. Further visualization was achieved by staining with  $\text{KMnO}_4$  followed by heating. Column chromatography separations were performed on silica gel (300–400 mesh). Enantiomeric excesses (*ee*) were determined by HPLC analysis on SHIMADZU HPLC system with Daicel chiral columns.

## 2. Materials

Toluene was distilled over benzophenone ketyl under  $\text{N}_2$ . 1,4-Dioxane, 1,2-dichloroethane, EtOH and THF (Extra Dry, with molecular sieves, stabilized with BHT, water  $\leq 50$  ppm (by K.F.)) were purchased from commercial supplier and used as received. Rhodium complex  $[\text{Rh}(\text{OH})(\text{cod})]_2^{[1]}$  was prepared according to the reported procedures. Catalysts  $[\text{RhCl}(\text{L1})]_2^{[2]}$ ,  $[\text{RhCl}(\text{L2})]_2^{[2]}$ ,  $[\text{RhCl}(\text{L3})]_2^{[3]}$  and  $[\text{RhCl}((R,R)\text{-Ph-bod})]_2^{[4]}$  were prepared according to the literature procedures. All the organoboronic acids were purchased from commercial suppliers and used as received.

### 3. A General Procedure for Table 1

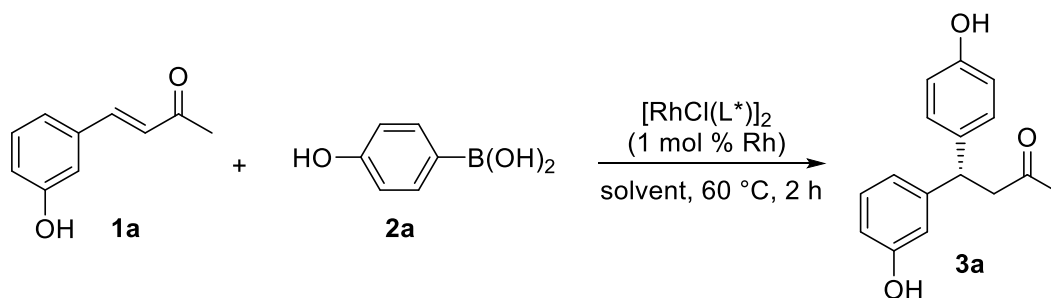

$[\text{RhCl}(\text{L})]_2$  (1.0  $\mu\text{mol}$ , 1 mol % Rh), **1a** (0.20 mmol) and **2a** (0.30 mmol) were placed in an oven-dried Schlenk tube under nitrogen. Solvent was added, and the reaction was stirred at 60 °C for 2 h. Upon completion, the mixture was passed through a short pad of silica gel with EtOAc as the eluent. The solvent was removed on a rotary evaporator, and the crude product was subjected to silica gel chromatography with petroleum ether/EtOAc (v/v = 3/1) to give **3a**.

### 4. Procedures for Table 2 & Table 3

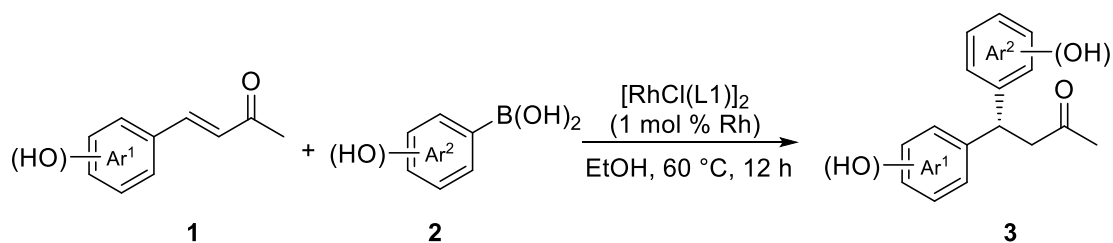

$[\text{RhCl}(\text{L}1)]_2$  (0.95 mg, 1.0  $\mu\text{mol}$ , 1 mol % Rh) and **2** (0.30 mmol) were placed in an oven-dried Schlenk tube under nitrogen. EtOH (0.4 mL), **1** (0.20 mmol) and another portion of EtOH (0.6 mL) was added successively, and the reaction was stirred at 60 °C for 12 h. Upon completion, the solution was passed through a short pad of silica gel with EtOAc as the eluent. The solvent was removed on a rotary evaporator, and the crude product was subjected to silica gel chromatography with petroleum ether/EtOAc (v/v = 3/1) to give **3**.

### A general procedure for dehydration of hemiacetal product

TsOH·H<sub>2</sub>O (0.02 mmol), the hemiacetal product (0.20 mmol) and 4 Å MS (0.20 g) were placed in an oven-dried Schlenk tube under nitrogen. Toluene (1.0 mL) was added, and the mixture was then heated to 100 °C for 3 h. Upon completion, the mixture was passed through a short pad of silica gel with EtOAc as the eluent. The solvent was removed on a rotary evaporator, and the crude product was subjected to silica gel chromatography with petroleum ether/EtOAc (v/v = 20/1) to give chromene.

## 5. Procedures for Scheme 2

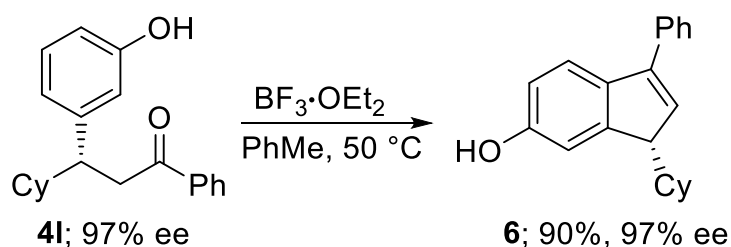

BF<sub>3</sub>·OEt<sub>2</sub> (74.0 μL, 0.60 mmol) and enantioenriched **4I** (49.0 mg, 0.20 mmol, 97% ee) were placed in an oven-dried Schlenk tube under nitrogen. Toluene (1.0 mL) was added and the reaction was stirred at 50 °C for 12 h. Upon completion, the mixture was passed through a short pad of silica gel with EtOAc as the eluent. The solvent was removed on a rotary evaporator, and the crude product was subjected to silica gel chromatography with petroleum ether/EtOAc (v/v = 10/1) to give **6** (52.2 mg, 90% yield, 97% ee) as a pale yellow solid.

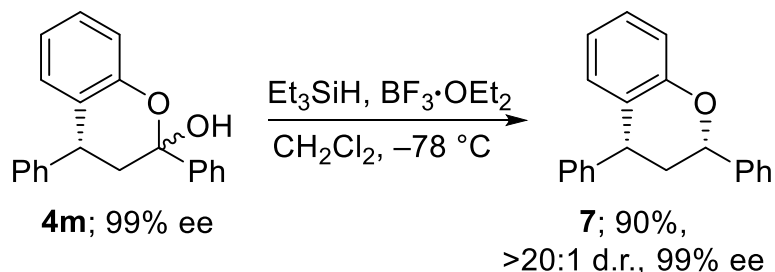

Enantioenriched **4m** (60.5 mg, 0.20 mmol, 99% ee) was dissolved in CH<sub>2</sub>Cl<sub>2</sub> (2 mL). The solution was cooled to −78 °C, and then silane (3.0 mmol) was added followed by the addition of BF<sub>3</sub>·OEt<sub>2</sub> (0.80 mmol). After 1 h, the reaction was warmed

to rt and the solvent was removed. The residue was purified by column chromatography with petroleum ether/EtOAc (v/v = 20/1) to give **7** (51.4 mg, 90% yield, dr > 20:1, 99% ee) as a white solid.

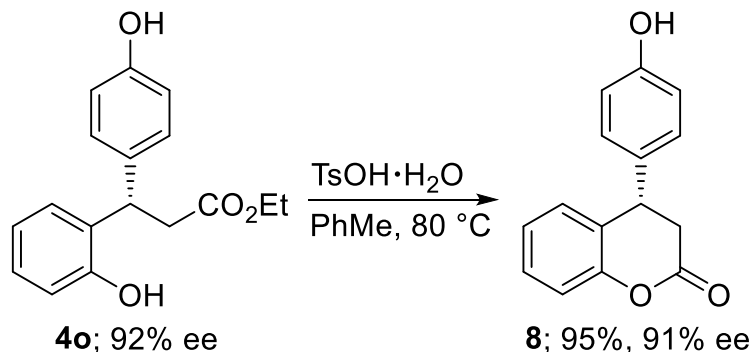

TsOH·H<sub>2</sub>O (0.04 mmol) and enantioenriched **4o** (57.3 mg, 0.20 mmol, 92% ee) were placed in an oven-dried Schlenk tube under nitrogen. Toluene (1.0 mL) was added and the reaction was stirred at 80 °C for 12 h. Upon completion, the mixture was passed through a short pad of silica gel with EtOAc as the eluent. The solvent was removed on a rotary evaporator, and the crude product was subjected to silica gel chromatography with petroleum ether/EtOAc (v/v = 4/1) to give **8** (45.6 mg, 95% yield, 91% ee) as a white solid.

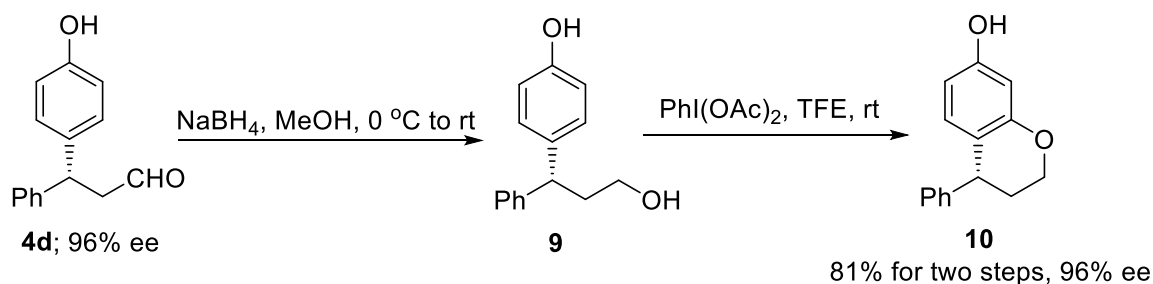

Enantioenriched **4d** (45.2 mg, 0.20 mmol, 96% ee) was dissolved in MeOH (2 mL), and NaBH<sub>4</sub> (0.40 mmol) was added at 0 °C. Then the reaction was allowed to warm to rt and stirred for 2 h. Upon completion, the solvent was removed on a rotary evaporator, the residue was subjected to silica gel chromatography with petroleum ether/EtOAc (v/v = 1/1) to give **9**, which was directly dissolved in CF<sub>3</sub>CH<sub>2</sub>OH (1.0 mL), and PhI(OAc)<sub>2</sub> (77.3 mg, 0.24 mmol) was added. The reaction was stirred at rt for 2 h. The mixture was purified by flash gel column chromatography eluting with petroleum ether /EtOAc (v/v = 10:1) to give **10** (36.6 mg, 81% yield, 96% ee) as a pale yellow solid.

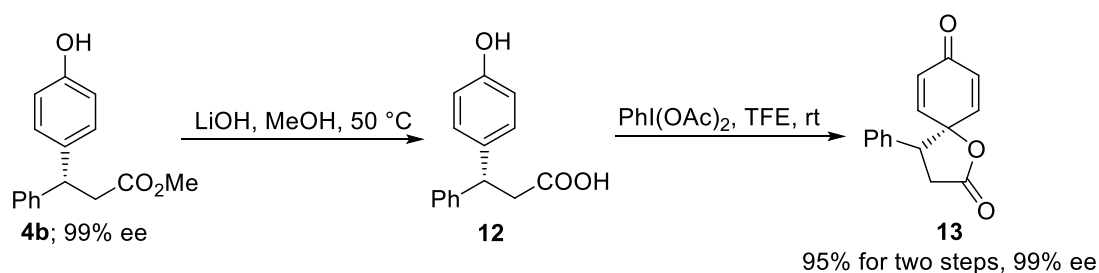

Enantioenriched **4b** (51.3 mg, 0.20 mmol, 99% ee) was dissolved in MeOH (2.0 mL)/H<sub>2</sub>O (1.0 mL), and LiOH·H<sub>2</sub>O (0.80 mmol) was added. The reaction was stirred at 50 °C for 6 h. Upon completion, it was cooled to room temperature and 2N HCl (10 mL) was added. The mixture was extracted with CH<sub>2</sub>Cl<sub>2</sub> (8 mL\*3). The combined organic extracts were dried over MgSO<sub>4</sub>, filtered, and concentrated under vacuum to give the crude carboxylic acid, which was used for the next step without further purification. Intermediate **12** was dissolved in CF<sub>3</sub>CH<sub>2</sub>OH (1.0 mL), and PhI(OAc)<sub>2</sub> (77.3 mg, 0.24 mmol) was added. The reaction mixture was stirred at rt for 1 h. The solvent was removed on a rotary evaporator, and the residue was purified by flash gel column chromatography eluting with petroleum ether /EtOAc (v/v = 2:1) to give **13** (45.6 mg, 95% yield, 99% ee) as a pale yellow solid.

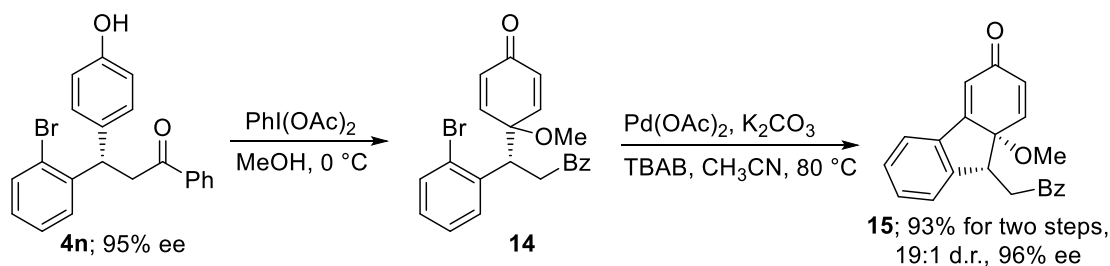

Enantioenriched **4n** (76.3 mg, 0.20 mmol, 96% ee) was reacted with PhI(OAc)<sub>2</sub> (77.3 mg, 0.24 mmol) in MeOH (1.0 mL) at 0 °C for 4 h. Upon completion, the solvent was removed on a rotary evaporator, the residue was subjected to silica gel chromatography with petroleum ether/EtOAc (v/v = 10/1) to get **14**. Then intermediate **14**, Pd(OAc)<sub>2</sub> (0.02 mmol), K<sub>2</sub>CO<sub>3</sub> (0.80 mmol) and TBAB (0.20 mmol) were placed in an oven-dried Schlenk tube under nitrogen. CH<sub>3</sub>CN (1.0 mL) were added, and the reaction was stirred at 80 °C for 6 h. Upon completion, the mixture was passed through a short pad of silica gel with EtOAc as the eluent. The solvent was removed on a rotary evaporator, and the crude product was subjected to silica gel

chromatography with petroleum ether/EtOAc (v/v = 10/1) to give **15** (61.4 mg, 93% yield, 19:1 dr, 96% ee) as a pale yellow solid. The configuration of the newly generated stereocenter of **15** was assigned by NOE study (see part 9, NMR spectra).

## 6. Procedures for Scheme 3

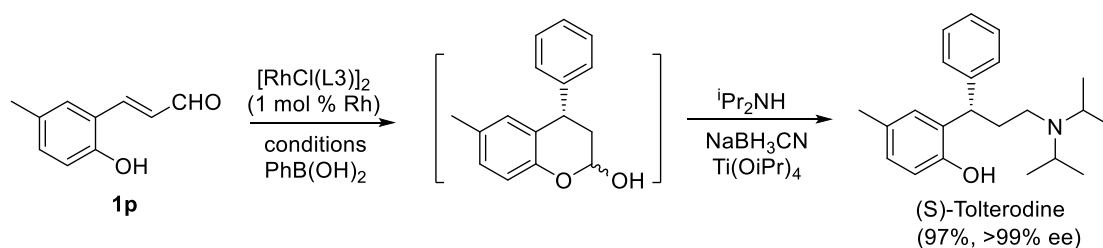

$[\text{RhCl}(\text{L}3)]_2$  (0.8 mg, 1.0  $\mu\text{mol}$ , 1 mol % Rh), **1** (0.20 mmol) and **2** (0.30 mmol) were placed in an oven-dried Schlenk tube under nitrogen. EtOH (0.4 mL), KOH (0.56 mg, 10  $\mu\text{mol}$ , in 0.1 mL  $\text{H}_2\text{O}$ ) and another portion of EtOH (0.6 mL) were added successively, and the reaction was stirred at 60 °C for 12 h. Upon completion, the mixture was passed through a short pad of silica gel with EtOAc as the eluent. The solvent was removed on a rotary evaporator. The residue was dissolved in THF (0.5 mL) and transferred to an oven-dried Schlenk tube containing  $\text{Ti}(\text{O}^i\text{Pr})_4$  (0.60 mmol),  $i\text{Pr}_2\text{NH}$  (1.0 mmol) and  $\text{NaBH}_3\text{CN}$  (0.60 mmol) under nitrogen. Then 0.5 mL of THF was added and the reaction was stirred at 70 °C for 12 h. The solvent was removed on a rotary evaporator, and the crude product was subjected to silica gel chromatography with petroleum ether/EtOAc/ $\text{Et}_3\text{N}$  (v/v = 70/30/1) to give the product.

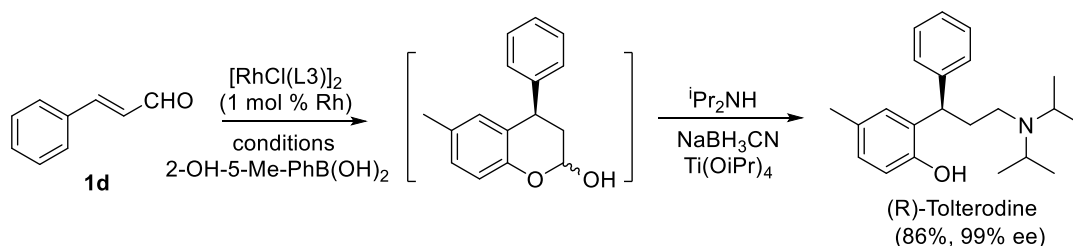

$[\text{RhCl}(\text{L}3)]_2$  (0.8 mg, 1.0  $\mu\text{mol}$ , 1 mol % Rh), **1q** (0.20 mmol) and 2-OH-5-Me- $\text{PhB}(\text{OH})_2$  (0.80 mmol) were placed in an oven-dried Schlenk tube under nitrogen. EtOH (0.4 mL), KOH (0.56 mg, 10  $\mu\text{mol}$ , in 0.1 mL  $\text{H}_2\text{O}$ ) and another portion of EtOH (0.6 mL) were added successively, and the reaction was stirred at 60 °C for 12 h. Upon completion, the mixture was passed through a short pad of silica gel

with EtOAc as the eluent. The solvent was removed on a rotary evaporator. The residue was dissolved in THF (0.5 mL) and transferred to an oven-dried Schlenk tube containing  $\text{Ti}(\text{O}^i\text{Pr})_4$  (0.60 mmol),  $^i\text{Pr}_2\text{NH}$  (1.0 mmol) and  $\text{NaBH}_3\text{CN}$  (0.60 mmol) under nitrogen. Then 0.5 mL of THF was added and the reaction was stirred at 70 °C for 12 h. The solvent was removed on a rotary evaporator, and the crude product was subjected to silica gel chromatography with petroleum ether/EtOAc/ $\text{Et}_3\text{N}$  (v/v = 70/30/1) to give the product.

## 7. Procedures for Scheme 4

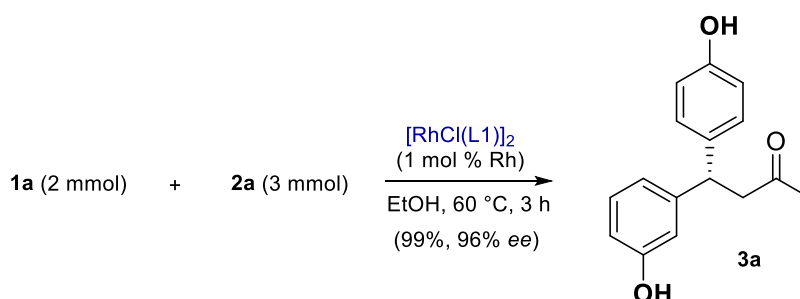

$[\text{RhCl}(\text{L1})]_2$  (9.5 mg, 1 mol % Rh), **1a** (2.0 mmol) and **2a** (3.0 mmol) were placed in an oven-dried Schlenk tube under nitrogen. EtOH (4.0 mL) was added, and the reaction was stirred at 60 °C for 3 h. Upon completion, the solution was passed through a short pad of silica gel with EtOAc as the eluent. The solvent was removed on a rotary evaporator, and the crude product was subjected to silica gel chromatography with petroleum ether/EtOAc (v/v = 3/1 to 2/1) to give **3** and a mixture of recovered catalyst and phenol.

Recycling of the catalyst: **1a** (2.0 mmol) and **2a** (3.0 mmol) were placed in an oven-dried Schlenk tube under nitrogen, an ethanol solution (4.0 mL) of the recovered catalyst with phenol was added. The reaction was stirred at 60 °C for 3 h. The workup was the same as above.

## 8. Characterization of the Products

### (S)-4-(3-Hydroxyphenyl)-4-(4-hydroxyphenyl)butan-2-one (3a)

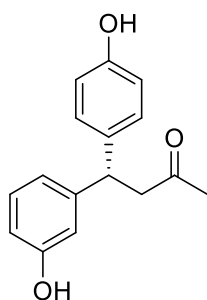

**Compound 3a.** (99% yield, 97% ee (*S*)). White solid, 51.2 mg at 0.20 mmol scale. The ee of **3a** was determined by HPLC analysis: (Chiralcel IF column, 1.0 mL/min, hexane/isopropanol = 80/20, 210 nm,  $t_{\text{major}} = 9.0$  min (*S*),  $t_{\text{minor}} = 7.6$  min (*R*));  $[\alpha]_D^{20} -0.85$  ( $c$  0.47, CH<sub>3</sub>OH) for 97% ee (*S*). <sup>1</sup>H NMR (300 MHz, *d*<sub>6</sub>-DMSO)  $\delta$  2.05 (s, 3H), 3.13 (d,  $J = 7.5$  Hz, 2H), 4.28 (t,  $J = 7.4$  Hz, 1H), 6.56 (d,  $J = 7.9$  Hz, 1H), 6.63 – 6.70 (m, 4H), 7.02 – 7.07 (m, 3H), 9.23 (s, 1H), 9.26 (s, 1H); <sup>13</sup>C NMR (75 MHz, *d*<sub>6</sub>-DMSO)  $\delta$  30.6, 45.2, 49.2, 113.4, 114.9, 115.5, 118.4, 128.9, 129.7, 135.1, 146.9, 156.1, 157.7, 207.3. HRMS (ESI) calcd for C<sub>16</sub>H<sub>16</sub>NaO<sub>3</sub><sup>+</sup> [M+Na]<sup>+</sup> 279.0992, found 279.0995.

### (S)-4-(3-Hydroxy-4-methoxyphenyl)-4-(4-hydroxyphenyl)butan-2-one (3b)

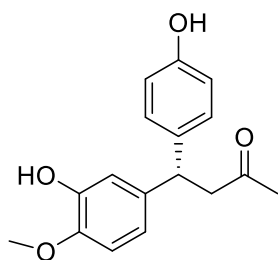

**Compound 3b.** (99% yield, >99% ee (*S*)). White solid, 57.2 mg at 0.20 mmol scale. The ee of **3b** was determined by HPLC analysis: (Chiralcel IF column, 1.0 mL/min, hexane/isopropanol = 80/20, 210 nm,  $t_{\text{major}} = 24.0$  min (*S*),  $t_{\text{minor}} = 15.9$  min (*R*));  $[\alpha]_D^{20} +1.6$  ( $c$  0.61, CH<sub>3</sub>OH) for >99% ee (*S*). <sup>1</sup>H NMR (300 MHz, *d*<sub>6</sub>-DMSO)  $\delta$  2.03 (s, 3H), 3.07 (d,  $J = 7.7$  Hz, 2H), 3.70 (s, 3H), 4.23 (t,  $J = 7.7$  Hz, 1H), 6.62 – 6.68 (m, 4H), 6.76 – 6.80 (m, 1H), 7.01 – 7.05 (m, 2H), 8.76 (s, 1H), 9.16 (s, 1H); <sup>13</sup>C NMR (126 MHz, *d*<sub>6</sub>-DMSO)  $\delta$  30.1, 44.2, 49.0, 55.7, 112.2, 115.0, 117.7, 128.3, 135.0, 137.7, 145.9, 146.3, 155.5, 206.9. HRMS (ESI) calcd for C<sub>17</sub>H<sub>18</sub>NaO<sub>4</sub><sup>+</sup> [M+Na]<sup>+</sup> 309.1097, found 309.1098.

### (S)-4-(4-Hydroxy-3-methoxyphenyl)-4-(4-hydroxyphenyl)butan-2-one (3c)

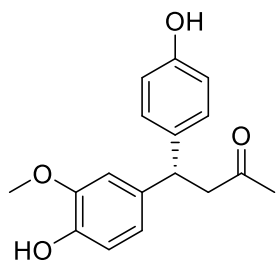

**Compound 3c.** (99% yield, 96% ee (*S*)). White solid, 57.2 mg at 0.20 mmol scale. The ee of **3c** was determined by HPLC analysis: (Chiralcel IC column, 1.0 mL/min, hexane/isopropanol = 70/30, 210 nm,  $t_{\text{major}} = 11.8$  min (*S*),  $t_{\text{minor}} = 12.8$  min (*R*));  $[\alpha]_D^{20} -6.7$  ( $c$  1.1, CH<sub>3</sub>OH) for 96% ee

(*S*).  $^1\text{H}$  NMR (500 MHz,  $d_6$ -DMSO)  $\delta$  2.06 (s, 3H), 3.16 (d,  $J$  = 7.8 Hz, 2H), 3.77 (s, 3H), 4.33 (t,  $J$  = 7.7 Hz, 1H), 6.67 – 6.74 (m, 4H), 6.86 (d,  $J$  = 1.5 Hz, 1H), 7.12 (d,  $J$  = 8.5 Hz, 2H), 8.71 (s, 1H), 9.19 (s, 1H);  $^{13}\text{C}$  NMR (126 MHz,  $d_6$ -DMSO)  $\delta$  30.2, 44.6, 49.2, 55.7, 112.0, 115.1, 115.4, 119.6, 128.3, 135.2, 136.0, 144.8, 147.4, 155.5, 207.0. HRMS (ESI) calcd for  $\text{C}_{17}\text{H}_{18}\text{NaO}_4^+$  [ $\text{M}+\text{Na}$ ] $^+$  309.1097, found 309.1098.

(*S*)-4-(3-Chloro-4-hydroxyphenyl)-4-(4-hydroxyphenyl)butan-2-one (**3d**)

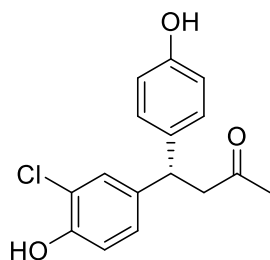

**Compound 3d.** (87% yield, 95% ee (*S*)). White solid, 50.9 mg at 0.20 mmol scale. The ee of **3d** was determined by HPLC analysis: (Chiralcel IC column, 1.0 mL/min, hexane/isopropanol = 80/20, 210 nm,  $t_{\text{major}}$  = 8.7 min (*S*),  $t_{\text{minor}}$  = 9.6 min (*R*));  $[\alpha]_D^{20}$  +1.1 ( $c$  0.45,  $\text{CH}_3\text{OH}$ ) for 95% ee (*S*).

$^1\text{H}$  NMR (500 MHz,  $d_6$ -DMSO)  $\delta$  2.06 (s, 3H), 3.15 (d,  $J$  = 7.8 Hz, 2H), 4.30 (t,  $J$  = 7.7 Hz, 1H), 6.69 (d,  $J$  = 8.4 Hz, 2H), 6.88 (d,  $J$  = 8.3 Hz, 1H), 7.03 – 7.09 (m, 3H), 7.21 (d,  $J$  = 1.8 Hz, 1H), 9.20 (s, 1H), 9.89 (s, 1H);  $^{13}\text{C}$  NMR (126 MHz,  $d_6$ -DMSO)  $\delta$  30.1, 43.6, 48.7, 115.1, 116.5, 119.3, 126.9, 128.3, 128.5, 134.6, 137.0, 151.1, 155.6, 206.7. HRMS (ESI) calcd for  $\text{C}_{16}\text{H}_{15}\text{NaClO}_3^+$  [ $\text{M}+\text{Na}$ ] $^+$  313.0602, found 313.0598.

(*S*)-4-(3,5-Dibromo-4-hydroxyphenyl)-4-(4-hydroxyphenyl)butan-2-one (**3e**)

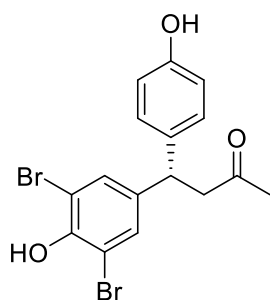

**Compound 3e.** (85% yield, 95% ee (*S*)). White solid, 70 mg at 0.20 mmol scale. The ee of **3e** was determined by HPLC analysis: (Chiralcel IC column, 1.0 mL/min, hexane/isopropanol = 80/20, 210 nm,  $t_{\text{major}}$  = 8.9 min (*S*),  $t_{\text{minor}}$  = 11.0 min (*R*));  $[\alpha]_D^{20}$  –2.0 ( $c$  0.68,  $\text{CH}_3\text{OH}$ ) for 95% ee (*S*).

$^1\text{H}$  NMR (500 MHz,  $d_6$ -DMSO)  $\delta$  2.07 (s, 3H), 3.14 – 3.27 (m, 2H), 4.32 (t,  $J$  = 7.6 Hz, 1H), 6.70 (d,  $J$  = 8.4 Hz, 2H), 7.11 (d,  $J$  = 8.4 Hz, 2H), 7.44 (s, 2H), 9.24 (s, 1H), 9.68 (s, 1H);  $^{13}\text{C}$  NMR (126 MHz,  $d_6$ -DMSO)  $\delta$  30.0, 43.2, 48.2, 111.8, 115.2, 128.3, 131.0, 134.0, 139.8, 148.7, 155.7, 206.5. HRMS (ESI) calcd for  $\text{C}_{16}\text{H}_{14}\text{Na}^{79}\text{Br}_2\text{O}_3^+$  [ $\text{M}+\text{Na}$ ] $^+$  434.9202, found 434.9207.

(R)-4-(4-Hydroxyphenyl)-4-phenylbutan-2-one (3f)

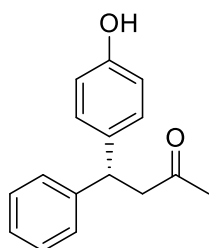

**Compound 3f.** (99% yield, 97% ee (*R*)). White solid, 48 mg at 0.20 mmol scale. The ee of **3f** was determined by HPLC analysis: (Chiralcel IF column, 1.0 mL/min, hexane/isopropanol = 80/20, 210 nm,  $t_{\text{major}} = 8.2$  min (*R*),  $t_{\text{minor}} = 7.3$  min (*S*));  $[\alpha]_{\text{D}}^{20} +0.85$  ( $c$  0.45, CH<sub>3</sub>OH) for 97% ee (*R*). <sup>1</sup>H NMR (300 MHz, *d*<sub>6</sub>-DMSO)  $\delta$  2.05 (s, 3H), 3.19 (d,  $J = 7.7$  Hz, 2H), 4.38 (t,  $J = 7.7$  Hz, 1H), 6.68 (d,  $J = 8.3$  Hz, 2H), 7.08 – 7.16 (m, 3H), 7.22 – 7.29 (m, 4H), 9.25 (s, 1H); <sup>13</sup>C NMR (101 MHz, *d*<sub>6</sub>-DMSO)  $\delta$  30.6, 45.3, 49.1, 115.6, 126.4, 127.9, 128.8, 128.9, 135.1, 145.5, 156.1, 207.3. HRMS (ESI) calcd for C<sub>16</sub>H<sub>16</sub>NaO<sub>2</sub><sup>+</sup> [M+Na]<sup>+</sup> 263.1043, found 263.1040.

(R)-4-(4-Hydroxyphenyl)-4-(4-(trifluoromethyl)phenyl)butan-2-one (3g)

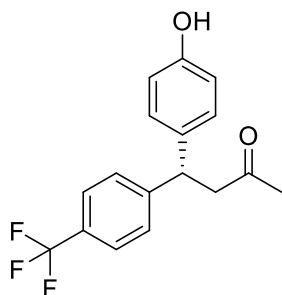

**Compound 3g.** (99% yield, 96% ee (*R*)). White solid, 61.6 mg at 0.20 mmol scale. The ee of **3g** was determined by HPLC analysis: (Chiralcel IC column, 1.0 mL/min, hexane/isopropanol = 80/20, 210 nm,  $t_{\text{major}} = 5.4$  min (*R*),  $t_{\text{minor}} = 6.7$  min (*S*));  $[\alpha]_{\text{D}}^{20} +5.9$  ( $c$  0.47, CH<sub>3</sub>OH) for 96% ee (*R*). <sup>1</sup>H NMR (300 MHz, *d*<sub>6</sub>-DMSO)  $\delta$  2.06 (s, 3H), 3.15 – 3.36 (m, 2H), 4.48 (t,  $J = 7.6$  Hz, 1H), 6.69 (d,  $J = 8.4$  Hz, 2H), 7.10 (d,  $J = 8.4$  Hz, 2H), 7.49 (d,  $J = 8.1$  Hz, 2H), 7.60 (d,  $J = 8.2$  Hz, 2H), 9.25 (s, 1H); <sup>13</sup>C NMR (126 MHz, *d*<sub>6</sub>-DMSO)  $\delta$  30.5, 45.0, 48.6, 115.7, 125.6 (q,  $J = 3.7$  Hz), 127.0, 127.3, 128.7, 128.9, 134.2, 150.4, 156.3, 206.9. HRMS (ESI) calcd for C<sub>17</sub>H<sub>15</sub>NaF<sub>3</sub>O<sub>2</sub><sup>+</sup> [M+Na]<sup>+</sup> 331.0916, found 331.0915.

(S)-4-(4-Chlorophenyl)-4-(4-hydroxyphenyl)butan-2-one (3h)

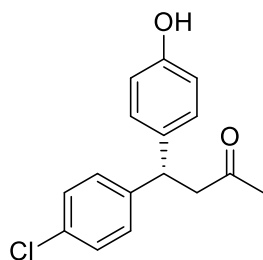

**Compound 3h.** (99% yield, 97% ee (*S*)). White solid, 54.8 mg at 0.20 mmol scale. The ee of **3h** was determined by HPLC analysis: (Chiralcel IF column, 1.0 mL/min, hexane/isopropanol = 80/20, 210 nm,  $t_{\text{major}} = 6.8$  min (*S*),  $t_{\text{minor}} = 6.5$  min (*R*));  $[\alpha]_{\text{D}}^{20} +6.2$  ( $c$  0.54, CH<sub>3</sub>OH) for 97% ee (*S*). <sup>1</sup>H NMR (300 MHz, *d*<sub>6</sub>-DMSO)  $\delta$  2.05 (s, 3H), 3.08 – 3.28 (m, 2H), 4.38 (t,  $J = 7.6$  Hz,

1H), 6.68 (d,  $J = 8.4$  Hz, 2H), 7.07 (d,  $J = 8.4$  Hz, 2H), 7.29 (s, 4H), 9.23 (s, 1H);  $^{13}\text{C}$  NMR (126MHz,  $d_6$ -DMSO)  $\delta$  30.6, 44.5, 48.9, 115.7, 128.6, 128.8, 129.7, 131.0, 134.6, 144.6, 156.2, 207.0. HRMS (ESI) calcd for  $\text{C}_{16}\text{H}_{15}\text{NaClO}_2^+ [\text{M}+\text{Na}]^+$  297.0653, found 297.0645.

(S)-4-(3-Bromophenyl)-4-(4-hydroxyphenyl)butan-2-one (3i)

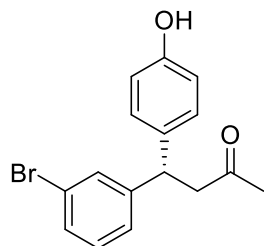

**Compound 3i.** (99% yield, 96% ee). Pale yellow solid, 63.6 mg at 0.20 mmol scale. The ee of **3i** was determined by HPLC analysis: (Chiralcel IC column, 1.0 mL/min, hexane/isopropanol = 80/20, 210 nm,  $t_{\text{major}} = 6.7$  min (*S*),  $t_{\text{minor}} = 8.4$  min (*R*));  $[\alpha]^{20}_{\text{D}} -0.78$  ( $c$  0.52,  $\text{CH}_3\text{OH}$ ) for 96% ee (*S*).

$^1\text{H}$  NMR (400 MHz,  $d_6$ -DMSO)  $\delta$  2.06 (s, 3H), 3.12 – 3.33 (m, 2H), 4.38 (t,  $J = 7.6$  Hz, 1H), 6.69 (d,  $J = 8.4$  Hz, 2H), 7.11 (d,  $J = 8.4$  Hz, 2H), 7.17 – 7.25 (m, 1H), 7.26 – 7.36 (m, 2H), 7.47 (s, 1H), 9.27 (s, 1H).  $^{13}\text{C}$  NMR (101 MHz,  $d_6$ -DMSO)  $\delta$  30.6, 44.8, 48.6, 115.7, 122.1, 126.9, 128.9, 129.3, 130.7, 130.9, 134.4, 148.5, 156.3, 207.0. HRMS (ESI) calcd for  $\text{C}_{16}\text{H}_{15}\text{Na}^{79}\text{BrO}_2^+ [\text{M}+\text{Na}]^+$  341.0148, found 341.0149. HRMS (ESI) calcd for  $\text{C}_{16}\text{H}_{15}\text{Na}^{81}\text{BrO}_2^+ [\text{M}+\text{Na}]^+$  343.0127, found 343.0131.

(R)-4-Cyclohexyl-4-(4-hydroxyphenyl)butan-2-one (3j)

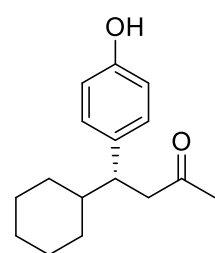

**Compound 3j.** (99% yield, 99% ee (*R*)). White solid, 49.2 mg at 0.20 mmol scale. The ee of **3j** was determined by HPLC analysis: (Chiralcel IC column, 1.0 mL/min, hexane/isopropanol = 80/20, 210 nm,  $t_{\text{major}} = 7.4$  min (*R*),  $t_{\text{minor}} = 9.9$  min (*S*));  $[\alpha]^{20}_{\text{D}} +25$  ( $c$  0.48,  $\text{CH}_3\text{OH}$ ) for 99% ee (*R*).

$^1\text{H}$  NMR (300 MHz,  $d_6$ -DMSO)  $\delta$  0.68 – 1.41 (m, 7H), 1.55 – 1.73 (m, 4H), 1.92 (s, 3H), 2.62 – 2.82 (m, 3H), 6.64 (d,  $J = 8.3$  Hz, 2H), 6.91 (d,  $J = 8.3$  Hz, 2H), 9.10 (s, 1H);  $^{13}\text{C}$  NMR (75 MHz,  $d_6$ -DMSO)  $\delta$  25.8, 25.95, 25.98, 30.0, 30.5, 42.7, 45.6, 46.7, 114.7, 128.9, 133.3, 155.4, 207.7. HRMS (ESI) calcd for  $\text{C}_{16}\text{H}_{22}\text{NaO}_2^+ [\text{M}+\text{Na}]^+$  269.1512, found 269.1509.

(S)-4-(4-Hydroxyphenyl)octan-2-one (3k)

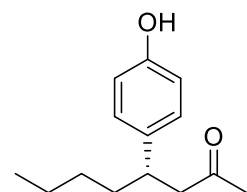

**Compound 3k.** (99% yield, 97% ee (*S*)). Colorless oil, 44.0 mg at 0.20 mmol scale. The ee of **3k** was determined by HPLC

analysis: (Chiralcel IF column, 1.0 mL/min, hexane/isopropanol = 90/10, 210 nm,  $t_{\text{major}} = 7.1$  min (*S*),  $t_{\text{minor}} = 7.7$  min (*R*));  $[\alpha]_{\text{D}}^{20} +14$  (*c* 0.55, CH<sub>3</sub>OH) for 97% ee (*S*). <sup>1</sup>H NMR (300 MHz, *d*<sub>6</sub>-DMSO)  $\delta$  0.78 (t, *J* = 7.0 Hz, 3H), 1.03 – 1.23 (m, 4H), 1.34 – 1.51 (m, 2H), 1.96 (s, 3H), 2.57 – 2.72 (m, 2H), 2.82 – 3.0 (m, 1H), 6.67 (d, *J* = 8.1 Hz, 2H), 6.97 (d, *J* = 8.1 Hz, 2H), 9.11 (s, 1H); <sup>13</sup>C NMR (126 MHz, *d*<sub>6</sub>-DMSO)  $\delta$  13.8, 22.0, 29.0, 30.1, 35.9, 39.7, 50.2, 115.0, 128.1, 134.7, 155.4, 207.4. HRMS (ESI) calcd for C<sub>14</sub>H<sub>20</sub>NaO<sub>2</sub><sup>+</sup> [*M*+Na]<sup>+</sup> 243.1356, found 243.1356.

(*R*)-4-(3-Chloro-4-hydroxyphenyl)-4-(4-hydroxyphenyl)butan-2-one (**3l**)

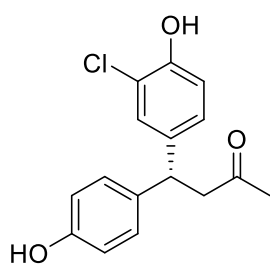

**Compound 3l.** (96% yield, 97% ee). White solid, 55.7 mg at 0.20 mmol scale. The ee of **3l** was determined by HPLC analysis: (Chiralcel IC column, 1.0 mL/min, hexane/isopropanol = 80/20, 210 nm,  $t_{\text{major}} = 9.4$  min (*R*),  $t_{\text{minor}} = 8.6$  min (*S*));  $[\alpha]_{\text{D}}^{20} -1.8$  (*c* 0.66, CH<sub>3</sub>OH) for 97% ee (*R*).

<sup>1</sup>H NMR (400 MHz, *d*<sub>6</sub>-DMSO)  $\delta$  2.05 (s, 3H), 3.15 (d, *J* = 7.9 Hz, 2H), 4.29 (t, *J* = 7.7 Hz, 1H), 6.69 (d, *J* = 8.5 Hz, 2H), 6.88 (d, *J* = 8.3 Hz, 1H), 7.00 – 7.12 (m, 3H), 7.21 (d, *J* = 2.1 Hz, 1H), 9.25 (s, 1H), 9.96 (s, 1H). <sup>13</sup>C NMR (101 MHz, *d*<sub>6</sub>-DMSO)  $\delta$  30.6, 44.1, 49.1, 115.6, 116.9, 119.8, 127.4, 128.8, 129.0, 135.1, 137.5, 151.6, 156.1, 207.3. HRMS (ESI) calcd for C<sub>16</sub>H<sub>15</sub>NaClO<sub>3</sub><sup>+</sup> [*M*+Na]<sup>+</sup> 313.0602, found 313.0598.

(*R*)-4-(4-Hydroxy-2-methylphenyl)-4-(4-hydroxyphenyl)butan-2-one (**3m**)

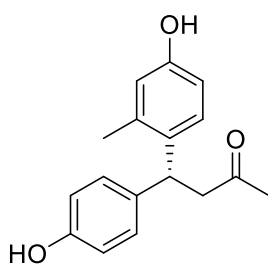

**Compound 3m.** (84% yield, >99% ee). White solid, 45.4 mg at 0.20 mmol scale. The ee of **3m** was determined by HPLC analysis: (Chiralcel IF column, 1.0 mL/min, hexane/isopropanol = 80/20, 210 nm,  $t_{\text{major}} = 7.1$  min (*R*),  $t_{\text{minor}} = 6.3$  min (*S*));  $[\alpha]_{\text{D}}^{20} -52$  (*c* 0.51, CH<sub>3</sub>OH) for >99% ee (*R*).

<sup>1</sup>H NMR (400 MHz, *d*<sub>6</sub>-DMSO)  $\delta$  2.02 (s, 3H), 2.17 (s, 3H), 2.97 – 3.15 (m, 2H), 4.44 (t, *J* = 7.6 Hz, 1H), 6.48 – 6.59 (m, 2H), 6.64 (d, *J* = 8.5 Hz, 2H), 6.98 (d, *J* = 8.5 Hz, 2H), 7.05 (d, *J* = 8.3 Hz, 1H), 9.08 (s, 1H), 9.17 (s, 1H). <sup>13</sup>C NMR (101 MHz, *d*<sub>6</sub>-DMSO)  $\delta$  20.0, 30.6, 40.4, 50.0, 113.1, 115.4, 117.5, 127.6, 129.0, 133.4, 135.1,

137.0, 155.6, 155.8, 207.5. HRMS (ESI) calcd for  $C_{17}H_{18}NaO_3^+$   $[M+Na]^+$  293.1148, found 293.1146.

(R)-4-(3-Hydroxyphenyl)-4-(4-hydroxyphenyl)butan-2-one (ent-3a)

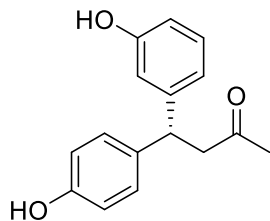

**Compound ent-3a.** (99% yield, 96% ee (*R*)). White solid, 51.2 mg at 0.20 mmol scale. The ee of **ent-3a** was determined by HPLC analysis: (Chiralcel IF column, 1.0 mL/min, hexane/isopropanol = 80/20, 210 nm,  $t_{major}$  = 7.2 min (*R*),  $t_{minor}$  = 8.6 min (*S*));  $[\alpha]_D^{20}$  +0.52 ( $c$  0.44,  $CH_3OH$ ) for 96% ee (*R*).  $^1H$  NMR (400 MHz,  $CD_3OD$ )  $\delta$  2.05 (s, 3H), 3.13 (d,  $J$  = 7.5 Hz, 2H), 4.37 (t,  $J$  = 7.8 Hz, 1H), 6.55 – 6.64 (m, 1H), 6.64 – 6.76 (m, 4H), 7.00 – 7.14 (m, 3H);  $^{13}C$  NMR (101 MHz,  $CD_3OD$ )  $\delta$  29.2, 45.4, 49.2, 112.8, 114.3, 114.8, 118.5, 128.4, 129.1, 134.9, 146.2, 155.4, 157.1, 209.2. HRMS (ESI) calcd for  $C_{16}H_{16}NaO_3^+$   $[M+Na]^+$  279.0992, found 279.0995.

(R)-4-(4-Fluoro-3-hydroxyphenyl)-4-(4-hydroxyphenyl)butan-2-one (3n)

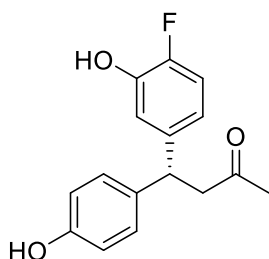

**Compound 3n.** (82% yield, 94% ee). White solid, 45.0 mg at 0.20 mmol scale. The ee of **3n** was determined by HPLC analysis: (Chiralcel IF column, 1.0 mL/min, hexane/isopropanol = 80/20, 210 nm,  $t_{major}$  = 7.3 min (*R*),  $t_{minor}$  = 8.6 min (*S*));  $[\alpha]_D^{20}$  -0.57 ( $c$  0.35,  $CH_3OH$ ) for 94% ee (*R*).  $^1H$  NMR (400 MHz,  $d_6$ -DMSO)  $\delta$  2.05 (s, 3H), 3.11 (d,  $J$  = 7.7 Hz, 2H), 4.27 (t,  $J$  = 7.7 Hz, 1H), 6.64 – 6.71 (m, 3H), 6.79 (dd,  $J$  = 8.6, 2.1 Hz, 1H), 6.99 (dd,  $J$  = 11.3, 8.4 Hz, 1H), 7.05 (d,  $J$  = 8.5 Hz, 2H), 9.24 (s, 1H), 9.69 (s, 1H).  $^{13}C$  NMR (101 MHz,  $d_6$ -DMSO)  $\delta$  30.6, 44.5, 49.2, 115.6, 116.1 (d,  $J$  = 18.0 Hz), 117.4 (d,  $J$  = 2.4 Hz), 118.4 (d,  $J$  = 6.4 Hz), 128.8, 135.0, 142.0 (d,  $J$  = 3.3 Hz), 144.8 (d,  $J$  = 12.4 Hz), 151.1 (d,  $J$  = 239.7 Hz), 156.1, 207.3. HRMS (ESI) calcd for  $C_{16}H_{15}NaFO_3^+$   $[M+Na]^+$  297.0897, found 297.0899.

(S)-4-(4-Hydroxyphenyl)-4-phenylbutan-2-one (ent-3f)

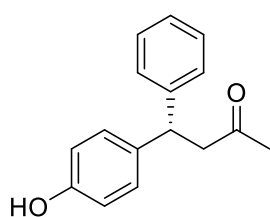

**Compound ent-3f.** (99% yield, 94% ee (*S*)). White solid, 48 mg at 0.20 mmol scale. The ee of **ent-3f** was determined by HPLC analysis: (Chiralcel IF column, 1.0 mL/min,

hexane/isopropanol = 80/20, 210 nm,  $t_{\text{major}} = 7.3$  min (*S*),  $t_{\text{minor}} = 8.6$  min (*R*));  $[\alpha]_{\text{D}}^{20} -1.3$  (*c* 0.44, CH<sub>3</sub>OH) for 94% ee (*S*). <sup>1</sup>H NMR (400 MHz, *d*<sub>6</sub>-DMSO)  $\delta$  2.05 (s, 3H), 3.13 – 3.26 (m, 2H), 4.38 (t, *J* = 7.7 Hz, 1H), 6.68 (d, *J* = 8.4 Hz, 2H), 7.08 – 7.16 (m, 3H), 7.23 – 7.29 (m, 4H), 9.23 (s, 1H); <sup>13</sup>C NMR (101 MHz, *d*<sub>6</sub>-DMSO)  $\delta$  30.6, 45.3, 49.1, 115.6, 126.4, 127.9, 128.8, 128.9, 135.1, 145.5, 156.1, 207.3. HRMS (ESI) calcd for C<sub>16</sub>H<sub>16</sub>NaO<sub>2</sub><sup>+</sup> [M+Na]<sup>+</sup> 263.1043, found 263.1040.

(*S*)-4-(3-Hydroxyphenyl)-4-phenylbutan-2-one (**3p**)

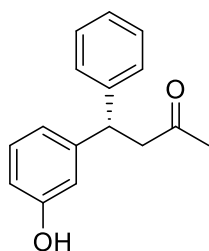

**Compound 3p.** (98% yield, 96% ee (*S*)). White solid, 47.1 mg at 0.20 mmol scale. The ee of **3p** was determined by HPLC analysis: (Chiralcel IF column, 1.0 mL/min, hexane/isopropanol = 80/20, 210 nm,  $t_{\text{major}} = 7.7$  min (*S*),  $t_{\text{minor}} = 6.9$  min (*R*));  $[\alpha]_{\text{D}}^{20} -1.1$  (*c* 0.56, CH<sub>3</sub>OH) for 96% ee (*S*). <sup>1</sup>H NMR (400 MHz, *d*<sub>6</sub>-DMSO)  $\delta$  2.07 (s, 3H), 3.22 (d, *J* = 7.7 Hz, 2H), 4.40 (t, *J* = 7.7 Hz, 1H), 6.57 – 6.60 (m, 1H), 6.67 – 6.69 (m, 1H), 6.74 (d, *J* = 7.7 Hz, 1H), 7.07 (t, *J* = 7.8 Hz, 1H), 7.13 – 7.19 (m, 1H), 7.24 – 7.31 (m, 4H), 9.31 (s, 1H); <sup>13</sup>C NMR (101 MHz, *d*<sub>6</sub>-DMSO)  $\delta$  30.6, 45.9, 48.8, 113.58, 115.1, 118.6, 126.5, 128.0, 128.8, 129.8, 144.9, 146.3, 157.8, 207.1. HRMS (ESI) calcd for C<sub>16</sub>H<sub>16</sub>NaO<sub>2</sub><sup>+</sup> [M+Na]<sup>+</sup> 263.1043, found 263.1040.

(*R*)-4-(4-Hydroxyphenyl)-4-(4-methoxyphenyl)butan-2-one (**3q**)

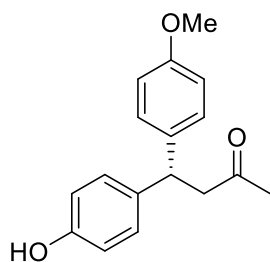

**Compound 3q.** (99% yield, 97% ee (*R*)). White solid, 54.1 mg at 0.20 mmol scale. The ee of **3q** was determined by HPLC analysis: (Chiralcel IF column, 1.0 mL/min, hexane/isopropanol = 80/20, 210 nm,  $t_{\text{major}} = 8.3$  min (*R*),  $t_{\text{minor}} = 9.5$  min (*S*));  $[\alpha]_{\text{D}}^{20} -2.5$  (*c* 0.52, CH<sub>3</sub>OH) for 97% ee (*R*). <sup>1</sup>H NMR (300 MHz, *d*<sub>6</sub>-DMSO)  $\delta$  2.02 (s, 3H), 3.12 (d, *J* = 7.7 Hz, 2H), 3.69 (s, 3H), 4.31 (t, *J* = 7.6 Hz, 1H), 6.65 (d, *J* = 8.2 Hz, 2H), 6.81 (d, *J* = 8.2 Hz, 2H), 7.05 (d, *J* = 8.0 Hz, 2H), 7.16 (d, *J* = 8.1 Hz, 2H), 9.16 (s, 1H); <sup>13</sup>C NMR (126 MHz, *d*<sub>6</sub>-DMSO)  $\delta$  30.1, 44.0, 49.0, 54.9, 113.6, 115.0, 128.2, 128.3, 135.0, 137.0, 155.5, 157.4, 206.8. HRMS (ESI) calcd for C<sub>17</sub>H<sub>18</sub>NaO<sub>3</sub><sup>+</sup> [M+Na]<sup>+</sup> 293.1148, found 293.1149.

(S)-4-(3-Hydroxyphenyl)-4-(p-tolyl)butan-2-one (3r)

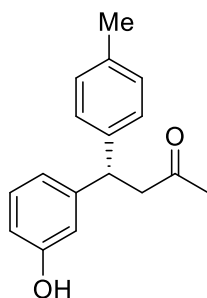

**Compound 3r.** (99% yield, 97% ee (*S*)). White solid, 50.8 mg at 0.20 mmol scale. The ee of **3r** was determined by HPLC analysis: (Chiralcel IF column, 1.0 mL/min, hexane/isopropanol = 80/20, 210 nm,  $t_{\text{major}} = 6.9$  min (*S*),  $t_{\text{minor}} = 6.3$  min (*R*));  $[\alpha]_{\text{D}}^{20} -2.7$  ( $c$  0.52, CH<sub>3</sub>OH) for 97% ee (*S*). <sup>1</sup>H NMR (400 MHz, *d*<sub>6</sub>-DMSO)  $\delta$  2.06 (s, 3H), 2.24 (s, 3H), 3.18 (d,  $J = 7.7$  Hz, 2H), 4.35 (t,  $J = 7.7$  Hz, 1H), 6.57 (dd,  $J = 7.9, 2.0$  Hz, 1H), 6.64 – 6.67 (m, 1H), 6.71 (d,  $J = 7.7$  Hz, 1H), 7.03 – 7.09 (m, 3H), 7.15 – 7.18 (m, 2H), 9.29 (s, 1H); <sup>13</sup>C NMR (101 MHz, *d*<sub>6</sub>-DMSO)  $\delta$  21.0, 30.6, 45.5, 48.8, 113.5, 115.0, 118.5, 127.9, 129.4, 129.7, 135.5, 141.8, 146.5, 157.8, 207.2. HRMS (ESI) calcd for C<sub>16</sub>H<sub>18</sub>NaO<sub>2</sub><sup>+</sup> [M+Na]<sup>+</sup> 277.1199, found 277.1199.

(R)-3-(4-Hydroxyphenyl)-1,3-diphenylpropan-1-one (4a)

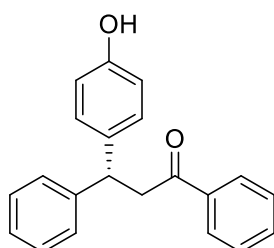

**Compound 4a.** (99% yield, 95% ee (*R*)). White solid, 60.4 mg at 0.20 mmol scale. The ee of **4a** was determined by HPLC analysis: (Chiralcel IC column, 1.0 mL/min, hexane/isopropanol = 90/10, 210 nm,  $t_{\text{major}} = 15.0$  min (*R*),  $t_{\text{minor}} = 14.1$  min (*S*));  $[\alpha]_{\text{D}}^{20} +3.1$  ( $c$  0.58, CH<sub>3</sub>OH) for 95% ee (*R*). <sup>1</sup>H NMR (400 MHz, *d*<sub>6</sub>-DMSO)  $\delta$  3.76 – 3.90 (m, 2H), 4.60 (t,  $J = 7.4$  Hz, 1H), 6.69 (d,  $J = 8.4$  Hz, 2H), 7.13 (t,  $J = 7.3$  Hz, 1H), 7.19 (d,  $J = 8.4$  Hz, 2H), 7.25 (t,  $J = 7.6$  Hz, 2H), 7.36 (d,  $J = 7.6$  Hz, 2H), 7.50 (t,  $J = 7.6$  Hz, 2H), 7.62 (t,  $J = 7.3$  Hz, 1H), 8.02 (d,  $J = 7.5$  Hz, 2H), 9.24 (s, 1H); <sup>13</sup>C NMR (101 MHz, *d*<sub>6</sub>-DMSO)  $\delta$  44.1, 45.5, 115.6, 126.3, 128.0, 128.7, 129.05, 129.14, 133.6, 135.4, 137.3, 145.8, 156.1, 198.7. HRMS (ESI) calcd for C<sub>21</sub>H<sub>18</sub>NaO<sub>2</sub><sup>+</sup> [M+Na]<sup>+</sup> 325.1199, found 325.1200.

Methyl (R)-3-(4-hydroxyphenyl)-3-phenylpropanoate (4b)

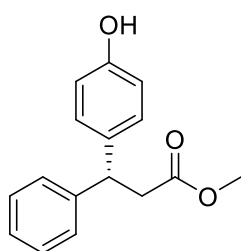

**Compound 4b.** (99% yield, 99% ee (*R*)). Pale yellow oil, 51.2 mg at 0.20 mmol scale. The ee of **4b** was determined by HPLC analysis: (Chiralcel IF column, 1.0 mL/min, hexane/isopropanol = 85/15, 210 nm,  $t_{\text{major}} = 6.3$  min (*R*),  $t_{\text{minor}} = 5.8$  min (*S*));  $[\alpha]_{\text{D}}^{20}$

+1.5 (*c* 0.55, CH<sub>3</sub>OH) for 99% ee (*R*). <sup>1</sup>H NMR (400 MHz, *d*<sub>6</sub>-DMSO) δ 3.00 – 3.14 (m, 2H), 3.49 (s, 3H), 4.36 (t, *J* = 8.0 Hz, 1H), 6.67 – 6.71 (m, 2H), 7.10 – 7.18 (m, 3H), 7.24 – 7.31 (m, 4H), 9.26 (s, 1H); <sup>13</sup>C NMR (101 MHz, *d*<sub>6</sub>-DMSO) δ 40.2, 46.3, 51.7, 115.6, 126.6, 127.8, 128.8, 134.6, 144.9, 156.2, 172.2. HRMS (ESI) calcd for C<sub>16</sub>H<sub>16</sub>NaO<sub>3</sub><sup>+</sup> [M+Na]<sup>+</sup> 279.0992, found 279.0987.

(*R*)-N-benzyl-3-(4-hydroxyphenyl)-3-phenylpropanamide (4c)

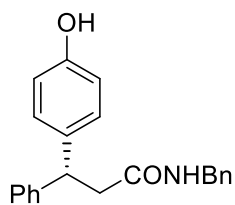

**Compound 4c.** (92% yield, 98% ee (*R*)). White solid, 60.9 mg at 0.20 mmol scale. The ee of **4c** was determined by HPLC analysis: (Chiralcel IF column, 1.0 mL/min, hexane/isopropanol = 70/30, 210 nm, *t*<sub>major</sub> = 6.6 min (*R*), *t*<sub>minor</sub> = 6.0 min (*S*)); [α]<sub>D</sub><sup>20</sup> +0.2 (*c* 0.49, CH<sub>3</sub>OH) for 98% ee (*R*). <sup>1</sup>H NMR (300 MHz, *d*<sub>6</sub>-DMSO) δ 2.89 (d, *J* = 8.0 Hz, 2H), 4.14 – 4.29 (m, 2H), 4.45 (t, *J* = 8.0 Hz, 1H), 6.71 (d, *J* = 8.4 Hz, 2H), 6.86 – 6.90 (m, 2H), 7.10 (d, *J* = 8.4 Hz, 2H), 7.17 – 7.21 (m, 4H), 7.24 – 7.29 (m, 4H), 8.34 (t, *J* = 5.7 Hz, 1H), 9.24 (s, 1H); <sup>13</sup>C NMR (126 MHz, *d*<sub>6</sub>-DMSO) δ 41.7, 41.7, 46.2, 115.1, 125.9, 126.4, 126.7, 127.5, 128.0, 128.2, 128.5, 134.4, 139.2, 144.8, 155.7, 170.3. HRMS (ESI) calcd for C<sub>22</sub>H<sub>22</sub>NO<sub>2</sub><sup>+</sup> [M+H]<sup>+</sup> 332.1645, found 332.1641.

(*R*)-3-(4-Hydroxyphenyl)-3-phenylpropanal (4d)

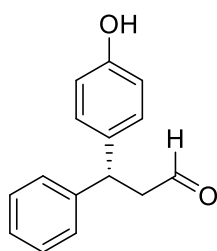

**Compound 4d.** (91% yield, 96% ee (*R*)). White solid, 41.2 mg at 0.20 mmol scale. The ee of **4d** was determined by HPLC analysis: (Chiralcel IC column, 1.0 mL/min, hexane/isopropanol = 80/20, 210 nm, *t*<sub>major</sub> = 8.3 min (*R*), *t*<sub>minor</sub> = 9.4 min (*S*)); [α]<sub>D</sub><sup>20</sup> –10 (*c* 0.40, CH<sub>3</sub>OH) for 96% ee (*R*). <sup>1</sup>H NMR (400 MHz, CDCl<sub>3</sub>) δ 3.08 – 3.22 (m, 2H), 4.59 (t, *J* = 7.8 Hz, 1H), 6.70 – 6.80 (m, 2H), 7.05 – 7.15 (m, 2H), 7.19 – 7.25 (m, 3H), 7.27 – 7.35 (m, 2H), 9.75 (t, *J* = 2.0 Hz, 1H); <sup>13</sup>C NMR (101 MHz, CDCl<sub>3</sub>) δ 44.2, 49.6, 115.7, 126.7, 127.6, 128.8, 128.9, 135.0, 143.6, 154.5, 202.4. HRMS (ESI) calcd for C<sub>15</sub>H<sub>14</sub>NaO<sub>2</sub><sup>+</sup> [M+Na]<sup>+</sup> 249.0886, found 249.0885.

(*R*)-3-(4-Hydroxyphenyl)-3-phenylpropanenitrile (4e)

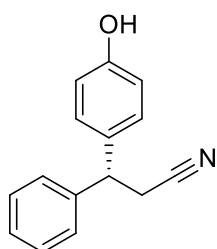

**Compound 4e.** (67% yield, 80% ee (*R*)). White solid, 41.2 mg at 0.20 mmol scale. The ee of **4e** was determined by HPLC analysis: (Chiralcel IF column, 1.0 mL/min, hexane/isopropanol = 90/10,

210 nm,  $t_{\text{major}} = 14.3$  min (*R*),  $t_{\text{minor}} = 13.5$  min (*S*));  $[\alpha]_{\text{D}}^{20} +0.98$  (*c* 0.31, CH<sub>3</sub>OH) for 80% ee (*R*). <sup>1</sup>H NMR (400 MHz, *d*<sub>6</sub>-DMSO)  $\delta$  3.27 (d, *J* = 8.1 Hz, 2H), 4.32 (t, *J* = 8.1 Hz, 1H), 6.72 (d, *J* = 8.4 Hz, 2H), 7.16 (d, *J* = 8.5 Hz, 2H), 7.19 – 7.25 (m, 1H), 7.29 – 7.38 (m, 4H), 9.36 (s, 1H); <sup>13</sup>C NMR (101 MHz, *d*<sub>6</sub>-DMSO)  $\delta$  23.4, 46.3, 115.7, 120.3, 127.2, 127.8, 128.96, 128.97, 133.1, 143.4, 156.7. HRMS (ESI) calcd for C<sub>15</sub>H<sub>13</sub>NaNO<sup>+</sup> [*M*+Na]<sup>+</sup> 246.0889, found 246.0894.

**Methyl (*R*)-5-(4-hydroxyphenyl)-3-oxo-5-phenylpentanoate (**4f**)**

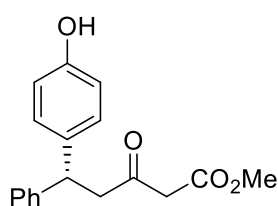

**Compound 4f.** (99% yield, >99% ee (*R*)). White solid, 59.6 mg at 0.20 mmol scale. The ee of **4f** was determined by HPLC analysis: (Chiralcel IB column, 1.0 mL/min, hexane/isopropanol = 85/15, 210 nm,  $t_{\text{major}} = 19.4$  min (*R*),  $t_{\text{minor}} = 46.1$  min (*S*));  $[\alpha]_{\text{D}}^{20} +6.3$  (*c* 0.40, CH<sub>3</sub>OH) for >99% ee (*R*). <sup>1</sup>H NMR (300 MHz, *d*<sub>6</sub>-DMSO)  $\delta$  3.32 (d, *J* = 7.5 Hz, 2H), 3.53 – 3.65 (m, 5H), 4.37 (t, *J* = 7.5 Hz, 1H), 6.67 (d, *J* = 8.3 Hz, 2H), 7.07 (d, *J* = 8.4 Hz, 2H), 7.11 – 7.19 (m, 1H), 7.25 (d, *J* = 4.2 Hz, 4H), 9.19 (s, 1H); <sup>13</sup>C NMR (126 MHz, *d*<sub>6</sub>-DMSO)  $\delta$  44.3, 48.0, 48.8, 51.7, 115.1, 125.9, 127.3, 128.2, 128.3, 134.3, 144.7, 155.6, 167.4, 201.5. HRMS (ESI) calcd for C<sub>18</sub>H<sub>18</sub>NaO<sub>4</sub><sup>+</sup> [*M*+Na]<sup>+</sup> 321.1097, found 321.1098.

**Dimethyl (*R*)-(4-(4-hydroxyphenyl)-2-oxo-4-phenylbutyl)phosphonate (**4g**)**

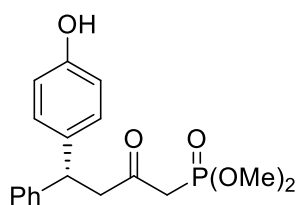

**Compound 4g.** (96% yield, 96% ee (*R*)). White solid, 66.8 mg at 0.20 mmol scale. The ee of **4g** was determined by HPLC analysis: (Chiralcel IF column, 1.0 mL/min, hexane/isopropanol = 80/20, 210 nm,  $t_{\text{major}} = 15.2$  min (*R*),  $t_{\text{minor}} = 14.2$  min (*S*));  $[\alpha]_{\text{D}}^{20} +2.5$  (*c* 0.52, CH<sub>3</sub>OH) for 96% ee (*R*). <sup>1</sup>H NMR (300 MHz, *d*<sub>6</sub>-DMSO)  $\delta$  3.20 – 3.38 (m, 4H), 3.59 (s, 3H), 3.63 (s, 3H), 4.39 (t, *J* = 7.4 Hz, 1H), 6.67 (d, *J* = 8.3 Hz, 2H), 7.07 (d, *J* = 8.4 Hz, 2H), 7.12 – 7.17 (m, 1H), 7.25 (d, *J* = 4.2 Hz, 4H), 9.20 (s, 1H); <sup>13</sup>C NMR (126 MHz, *d*<sub>6</sub>-DMSO)  $\delta$  40.8, 44.1, 49.1, 52.5, 52.5, 125.9, 127.4, 128.2, 128.4, 134.4, 144.8, 155.6, 200.20, 200.24. HRMS (ESI) calcd for C<sub>18</sub>H<sub>22</sub>O<sub>5</sub>P<sup>+</sup> [*M*+H]<sup>+</sup> 349.1199, found 349.1203.

(R)-3-(4-Hydroxyphenyl)cyclohexan-1-one (4h)

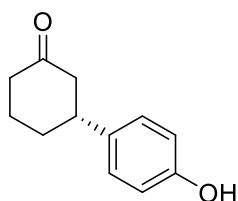

**Compound 4h.** (99% yield, 98% ee (*R*)). White solid, 38.1 mg at 0.20 mmol scale. The ee of **4h** was determined by HPLC analysis: (Chiralcel IC column, 1.0 mL/min, hexane/isopropanol = 80/20, 210 nm,  $t_{\text{major}} = 10.0$  min (*R*),  $t_{\text{minor}} = 11.1$  min (*S*));  $[\alpha]_{\text{D}}^{20} +6.4$  (*c* 0.39, CH<sub>3</sub>OH) for 98% ee (*R*). <sup>1</sup>H NMR (300 MHz, *d*<sub>6</sub>-DMSO)  $\delta$  1.55 – 1.92 (m, 3H), 1.93 – 2.06 (m, 1H), 2.17 – 2.33 (m, 2H), 2.33 – 2.47 (m, 1H), 2.56 (t, *J* = 13.1 Hz, 1H), 2.86 (t, *J* = 11.5 Hz, 1H), 6.70 (d, *J* = 8.2 Hz, 2H), 7.06 (d, *J* = 8.0 Hz, 2H), 9.20 (s, 1H); <sup>13</sup>C NMR (126 MHz, *d*<sub>6</sub>-DMSO)  $\delta$  25.4, 33.0, 40.9, 43.6, 49.1, 115.6, 127.9, 135.6, 156.2, 210.7. HRMS (ESI) calcd for C<sub>12</sub>H<sub>15</sub>O<sub>2</sub><sup>+</sup> [M+H]<sup>+</sup> 191.1067, found 191.1061.

(R)-3-(4-Hydroxyphenyl)cyclopentan-1-one (4i)

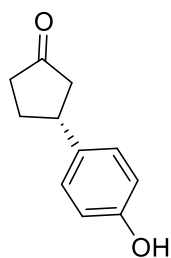

**Compound 4i.** (99% yield, 99% ee (*R*)). White solid, 35.2 mg at 0.20 mmol scale. The ee of **4i** was determined by HPLC analysis: (Chiralcel IF column, 1.0 mL/min, hexane/isopropanol = 90/10, 210 nm,  $t_{\text{major}} = 15.1$  min (*R*),  $t_{\text{minor}} = 14.1$  min (*S*));  $[\alpha]_{\text{D}}^{20} +74$  (*c* 0.42, CH<sub>3</sub>OH) for 99% ee (*R*). <sup>1</sup>H NMR (300 MHz, *d*<sub>6</sub>-Acetone)  $\delta$  2.29 – 2.47 (m, 1H), 2.62 – 2.82 (m, 4H), 2.90 – 3.05 (m, 1H), 3.70 – 3.91 (m, 1H), 7.26 (d, *J* = 8.4 Hz, 2H), 7.62 (d, *J* = 8.4 Hz, 2H), 8.61 (s, 1H); <sup>13</sup>C NMR (126 MHz, *d*<sub>6</sub>-Acetone)  $\delta$  32.1, 39.2, 42.3, 46.4, 116.0, 128.6, 135.4, 156.7, 217.4. HRMS (ESI) calcd for C<sub>11</sub>H<sub>12</sub>NaO<sub>2</sub><sup>+</sup> [M+Na]<sup>+</sup> 199.0730, found 199.0730.

(R)-4-(4-Hydroxyphenyl)tetrahydro-2H-pyran-2-one (4j)

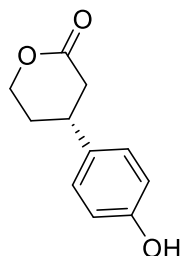

**Compound 4j.** (98% yield, 84% ee (*R*)). White solid, 37.7 mg at 0.20 mmol scale. The ee of **4j** was determined by HPLC analysis: (Chiralcel IC column, 1.0 mL/min, hexane/isopropanol = 70/30, 210 nm,  $t_{\text{major}} = 19.0$  min (*R*),  $t_{\text{minor}} = 23.5$  min (*S*));  $[\alpha]_{\text{D}}^{20} -6.3$  (*c* 0.33, CH<sub>3</sub>OH) for 84% (*R*). <sup>1</sup>H NMR (400 MHz, *d*<sub>6</sub>-Acetone)  $\delta$  1.94 – 2.17 (m, 2H), 2.51 – 2.61 (m, 1H), 2.72 – 2.82 (m, 1H), 3.18 – 3.29 (m, 1H), 4.49 – 4.33 (m, 2H), 6.63 – 6.93 (m, 2H), 7.10 – 7.20 (m, 2H), 8.29 (s, 1H); <sup>13</sup>C NMR (101 MHz,

*d*<sub>6</sub>-Acetone)  $\delta$  30.4, 36.6, 37.7, 68.3, 115.4, 127.6, 134.9, 156.2, 170.0. HRMS (ESI) calcd for C<sub>11</sub>H<sub>12</sub>NaO<sub>3</sub><sup>+</sup> [M+Na]<sup>+</sup> 215.0679, found 215.0680.

(*R*)-3-(3-Hydroxyphenyl)-1,3-diphenylpropan-1-one (4k)

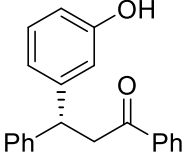 **Compound 4k.** (99% yield, 94% ee (*R*)). White solid, 60.4 mg at 0.20 mmol scale. The ee of **4k** was determined by HPLC analysis: (Chiralcel IC column, 1.0 mL/min, hexane/isopropanol = 90/10, 210 nm, *t*<sub>major</sub> = 16.1 min (*R*), *t*<sub>minor</sub> = 12.8 min (*S*)); [ $\alpha$ ]<sup>20</sup><sub>D</sub> -2.3 (*c* 0.60, CH<sub>3</sub>OH) for 94% ee (*R*). <sup>1</sup>H NMR (300 MHz, *d*<sub>6</sub>-DMSO)  $\delta$  3.84 (d, *J* = 7.3 Hz, 2H), 4.60 (t, *J* = 7.3 Hz, 1H), 6.59 (d, *J* = 7.9 Hz, 1H), 6.73 – 6.87 (m, 2H), 7.06 (t, *J* = 7.8 Hz, 1H), 7.14 (t, *J* = 7.1 Hz, 1H), 7.26 (t, *J* = 7.4 Hz, 2H), 7.37 (d, *J* = 7.4 Hz, 2H), 7.50 (t, *J* = 7.5 Hz, 2H), 7.61 (t, *J* = 7.1 Hz, 1H), 8.02 (d, *J* = 7.5 Hz, 2H), 9.28 (s, 1H); <sup>13</sup>C NMR (126 MHz, *d*<sub>6</sub>-DMSO)  $\delta$  43.4, 45.7, 113.0, 114.7, 118.2, 126.0, 127.6, 128.0, 128.2, 128.6, 129.2, 133.1, 136.8, 144.6, 146.0, 157.3, 197.9. HRMS (ESI) calcd for C<sub>21</sub>H<sub>18</sub>NaO<sub>2</sub><sup>+</sup> [M+Na]<sup>+</sup> 325.1199, found 325.1200.

(*R*)-3-Cyclohexyl-3-(3-hydroxyphenyl)-1-phenylpropan-1-one (4l)

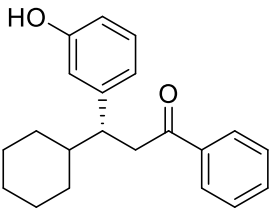 **Compound 4l.** (99% yield, 97% ee (*R*)). White solid, 61.6 mg at 0.20 mmol scale. The ee of **4l** was determined by HPLC analysis: (Chiralcel IB column, 1.0 mL/min, hexane/isopropanol = 90/10, 254 nm, *t*<sub>major</sub> = 5.3 min (*R*), *t*<sub>minor</sub> = 9.3 min (*S*)); [ $\alpha$ ]<sup>20</sup><sub>D</sub> +11 (*c* 0.47, CH<sub>3</sub>OH) for 97% ee (*R*). <sup>1</sup>H NMR (300 MHz, CDCl<sub>3</sub>)  $\delta$  0.77 – 1.33 (m, 5H), 1.47 – 1.70 (m, 4H), 1.71 – 1.92 (m, 2H), 3.08– 3.22 (m, 1H), 3.25 – 3.50 (m, 2H), 6.58 (s, 1H), 6.64 – 6.80 (m, 3H), 7.10 (t, *J* = 7.8 Hz, 1H), 7.43 (t, *J* = 7.5 Hz, 2H), 7.54 (t, *J* = 7.3 Hz, 1H), 7.82 – 7.97 (m, 2H); <sup>13</sup>C NMR (101 MHz, CDCl<sub>3</sub>)  $\delta$  26.4, 26.6, 30.9, 31.4, 42.6, 43.1, 47.2, 113.3, 115.6, 120.4, 128.2, 128.6, 129.2, 133.1, 137.1, 145.5, 155.8, 200.9. HRMS (ESI) calcd for C<sub>21</sub>H<sub>24</sub>NaO<sub>2</sub><sup>+</sup> [M+Na]<sup>+</sup> 331.1669, found 331.1668.

(*S*)-3-(2-Bromophenyl)-3-(4-hydroxyphenyl)-1-phenylpropan-1-one (4n)

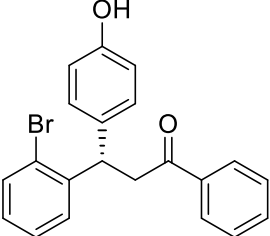 **Compound 4n.** (99% yield, 95% ee (*S*)). White solid, 76.0 mg at 0.20 mmol scale. The ee of **4n** was determined by HPLC

analysis: (Chiralcel IF column, 1.0 mL/min, hexane/isopropanol = 80/20, 210 nm,  $t_{\text{major}} = 7.2$  min (*S*),  $t_{\text{minor}} = 7.6$  min (*R*));  $[\alpha]_{\text{D}}^{20} -0.55$  ( $c$  0.73, CH<sub>3</sub>OH) for 95% ee (*S*). <sup>1</sup>H NMR (400 MHz, CDCl<sub>3</sub>)  $\delta$  3.49 – 3.66 (m, 2H), 5.10 (t,  $J = 7.3$  Hz, 1H), 6.22 (s, 1H), 6.49 – 6.61 (m, 2H), 6.86 – 7.01 (m, 3H), 7.10 (d,  $J = 4.7$  Hz, 2H), 7.32 (t,  $J = 7.6$  Hz, 2H), 7.44 (t,  $J = 7.2$  Hz, 2H), 7.83 (d,  $J = 8.1$  Hz, 2H). <sup>13</sup>C NMR (101 MHz, CDCl<sub>3</sub>)  $\delta$  44.3, 44.5, 115.6, 124.8, 127.7, 128.0, 128.2, 128.8, 129.3, 133.4, 133.5, 133.9, 136.7, 143.4, 154.6, 198.8. HRMS (ESI) calcd for C<sub>21</sub>H<sub>17</sub>Na<sup>79</sup>BrO<sub>2</sub><sup>+</sup> [M+Na]<sup>+</sup> 403.0304, found 403.0313. HRMS (ESI) calcd for C<sub>21</sub>H<sub>17</sub>Na<sup>81</sup>BrO<sub>2</sub><sup>+</sup> [M+Na]<sup>+</sup> 405.0284, found 405.0297.

**Ethyl (*S*)-3-(2-hydroxyphenyl)-3-(4-hydroxyphenyl)propanoate (**4o**)**

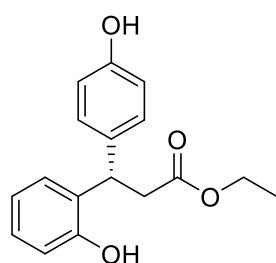

**Compound 4o.** (98% yield, 92% ee (*S*)). White solid, 56.1 mg at 0.20 mmol scale. The ee of **4o** was determined by HPLC analysis: (Chiralcel IB column, 1.0 mL/min, hexane/isopropanol = 80/20, 210 nm,  $t_{\text{major}} = 6.7$  min (*S*),  $t_{\text{minor}} = 10.5$  min (*R*));  $[\alpha]_{\text{D}}^{20} -27$  ( $c$  0.57, CH<sub>3</sub>OH) for 92% ee (*S*).

<sup>1</sup>H NMR (300 MHz, *d*<sub>6</sub>-DMSO)  $\delta$  1.04 (t,  $J = 6.9$  Hz, 3H), 2.97 (d,  $J = 7.9$  Hz, 2H), 3.95 (q,  $J = 6.8$  Hz, 2H), 4.70 (t,  $J = 7.9$  Hz, 1H), 6.61 – 6.82 (m, 4H), 6.90 – 7.02 (m, 1H), 7.03 – 7.18 (m, 3H), 9.17 (s, 1H), 9.39 (s, 1H); <sup>13</sup>C NMR (75 MHz, *d*<sub>6</sub>-DMSO)  $\delta$  14.4, 39.66, 39.74, 60.0, 115.3, 115.5, 119.3, 127.4, 128.0, 129.1, 131.0, 134.2, 154.8, 156.0, 171.9. HRMS (ESI) calcd for C<sub>17</sub>H<sub>18</sub>NaO<sub>4</sub><sup>+</sup> [M+Na]<sup>+</sup> 309.1097, found 309.1102.

**(*R*)-2-Methyl-4-phenyl-4H-chromene (**5a**)**

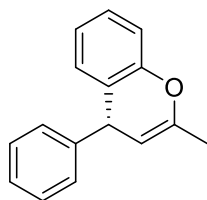

**Compound 5a.** (99% yield, >99% ee (*R*)). White solid, 44.4 mg at 0.20 mmol scale. The ee of **5a** was determined by HPLC analysis: (Chiralcel IB column, 1.0 mL/min, hexane/isopropanol = 98/2, 254 nm,  $t_{\text{major}} = 4.4$  min (*R*),  $t_{\text{minor}} = 4.1$  min (*S*));  $[\alpha]_{\text{D}}^{20} +107$  ( $c$  0.31, CH<sub>3</sub>OH) for >99% ee (*R*).

<sup>1</sup>H NMR (400 MHz, *d*<sub>6</sub>-DMSO)  $\delta$  1.95 (s, 3H), 4.67 (d,  $J = 2.4$  Hz, 1H), 4.87 (dd,  $J = 4.0, 1.0$  Hz, 1H), 6.93 – 6.99 (m, 3H), 7.13 – 7.23 (m, 4H), 7.28 – 7.32 (m, 2H); <sup>13</sup>C NMR (126 MHz, *d*<sub>6</sub>-DMSO)  $\delta$  18.8, 39.7, 100.4, 116.0,

123.0, 123.2, 126.3, 127.5, 127.8, 128.4, 129.6, 146.5, 146.9, 150.4. HRMS (ESI) calcd for  $C_{16}H_{15}O^+$   $[M+H]^+$  223.1117, found 223.1112.

(R)-2,4-Diphenyl-4H-chromene (5b)

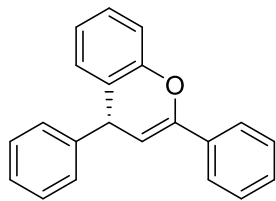

**Compound 5b.** (99% yield, 99% ee (*R*)). White solid, 56.8 mg at 0.20 mmol scale. The ee of **5b** was determined by HPLC analysis: (Chiralcel IB column, 1.0 mL/min, hexane/isopropanol = 98/2, 254 nm,  $t_{\text{major}} = 5.2$  min (*R*),  $t_{\text{minor}} = 4.9$  min (*S*));  $[\alpha]_D^{20} +0.26$  ( $c$  0.49,  $CH_3OH$ ) for 99% ee (*R*).  $^1H$  NMR (400 MHz,  $d_6$ -DMSO)  $\delta$  4.90 (d,  $J = 4.5$  Hz, 1H), 5.84 (d,  $J = 4.5$  Hz, 1H), 6.96 – 7.06 (m, 2H), 7.14 – 7.24 (m, 3H), 7.27 – 7.35 (m, 4H), 7.35 – 7.47 (m, 3H), 7.71 – 7.83 (m, 2H);  $^{13}C$  NMR (126 MHz,  $d_6$ -DMSO)  $\delta$  39.8, 101.0, 116.4, 123.2, 123.6, 124.2, 126.5, 127.7, 127.9, 128.4, 128.6, 129.5, 133.3, 146.4, 147.0, 150.3. HRMS (ESI) calcd for  $C_{21}H_{17}O^+$   $[M+H]^+$  285.1274, found 285.1275.

(S)-1-Cyclohexyl-3-phenyl-1H-inden-6-ol (6)

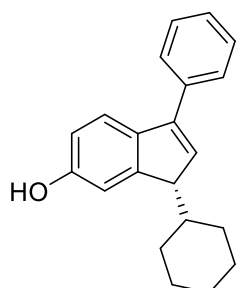

**Compound 6.** (90% yield, 97% ee). Pale yellow solid, 52.2 mg at 0.20 mmol scale. The ee of **6** was determined by HPLC analysis: (Chiralcel IB column, 1.0 mL/min, hexane/isopropanol = 90/10, 254 nm,  $t_{\text{major}} = 5.1$  min (*S*),  $t_{\text{minor}} = 5.5$  min (*R*));  $[\alpha]_D^{20} +33$  ( $c$  0.40,  $CH_3OH$ ) for 97% ee (*S*).  $^1H$  NMR (300 MHz,  $d_6$ -DMSO)  $\delta$  0.81 – 0.97 (m, 1H), 1.02 – 1.15 (m, 2H), 1.20 – 1.33 (m, 3H), 1.50 – 1.65 (m, 2H), 1.67 – 1.79 (m, 1H), 1.82 – 1.98 (m, 2H), 3.23 – 3.38 (m, 1H), 6.43 (d,  $J = 1.6$  Hz, 1H), 6.71 (dd,  $J = 8.2, 1.9$  Hz, 1H), 6.94 (s, 1H), 7.27 (d,  $J = 8.2$  Hz, 1H), 7.31 – 7.39 (m, 1H), 7.39 – 7.50 (m, 2H), 7.57 (d,  $J = 7.2$  Hz, 2H), 9.27 (s, 1H).  $^{13}C$  NMR (75 MHz,  $d_6$ -DMSO)  $\delta$  26.38, 26.45, 26.8, 28.2, 32.0, 40.8, 54.8, 111.8, 113.5, 120.6, 127.5, 127.8, 129.0, 131.6, 134.9, 136.2, 143.7, 149.8, 156.0. HRMS (ESI) calcd for  $C_{21}H_{23}O^+$   $[M+H]^+$  291.1743, found 291.1745.

(2S,4R)-2,4-Diphenylchromane (7)

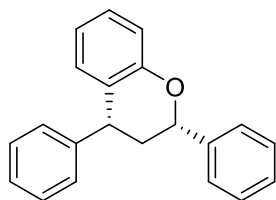

**Compound 7.** (90% yield, dr > 20:1, 99% ee). White solid, 51.4 mg at 0.20 mmol scale. The ee of **7** was determined by

HPLC analysis: (Chiralcel ID column, 1.0 mL/min, hexane/isopropanol = 98/2, 210 nm,  $t_{\text{major}} = 5.5$  min (*S*),  $t_{\text{minor}} = 5.9$  min (*R*));  $[\alpha]_{\text{D}}^{20} -58$  (*c* 0.51, CH<sub>3</sub>OH) for 99% ee (*4R*). <sup>1</sup>H NMR (400 MHz, CDCl<sub>3</sub>)  $\delta$  2.29 – 2.42 (m, 1H), 2.45 – 2.53 (m, 1H), 4.43 (dd, *J* = 12.1, 5.9 Hz, 1H), 5.18 – 5.39 (m, 1H), 6.82 – 6.92 (m, 2H), 7.04 (d, *J* = 8.1 Hz, 1H), 7.18 – 7.24 (m, 1H), 7.28 – 7.35 (m, 3H), 7.39 (t, *J* = 7.3 Hz, 3H), 7.47 (t, *J* = 7.4 Hz, 2H), 7.56 (d, *J* = 7.4 Hz, 2H). <sup>13</sup>C NMR (101 MHz, CDCl<sub>3</sub>)  $\delta$  40.7, 43.6, 78.2, 117.1, 120.6, 125.8, 126.2, 126.8, 127.8, 128.1, 128.6, 128.7, 129.9, 141.3, 144.6, 155.6. HRMS (ESI) calcd for C<sub>21</sub>H<sub>19</sub>O<sup>+</sup> [M+H]<sup>+</sup> 287.1430, found 287.1428.

(*S*)-4-(4-Hydroxyphenyl)chroman-2-one (**8**)

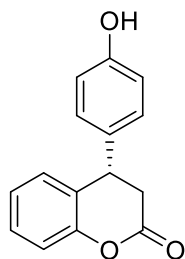

**Compound 8.** (95% yield, 91% ee). White solid, 45.6 mg at 0.20 mmol scale. The ee of **8** was determined by HPLC analysis: (Chiralcel IF column, 1.0 mL/min, hexane/isopropanol = 80/20, 254 nm,  $t_{\text{major}} = 8.4$  min (*S*),  $t_{\text{minor}} = 7.5$  min (*R*));  $[\alpha]_{\text{D}}^{20} +18$  (*c* 0.33, CH<sub>3</sub>OH) for 91% ee (*S*). <sup>1</sup>H NMR (300 MHz, CDCl<sub>3</sub>)  $\delta$  2.85 – 3.03 (m, 2H), 4.20 (t, *J* = 6.6 Hz, 1H), 6.70 (d, *J* = 8.4 Hz, 2H), 6.84 – 6.97 (m, 3H), 6.97 – 7.09 (m, 2H), 7.16 – 7.27 (m, 1H). <sup>13</sup>C NMR (75 MHz, CDCl<sub>3</sub>)  $\delta$  37.2, 39.8, 116.0, 117.1, 124.8, 126.1, 128.3, 128.66, 128.73, 132.0, 151.5, 155.3, 168.5. HRMS (ESI) calcd for C<sub>15</sub>H<sub>13</sub>O<sub>3</sub><sup>+</sup> [M+H]<sup>+</sup> 241.0859, found 241.0865.

(*R*)-4-Phenylchroman-7-ol (**10**)

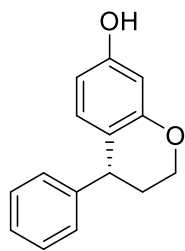

**Compound 10.** (81% yield, 96% ee). Pale yellow solid, 36.6 mg at 0.20 mmol scale. The ee of **10** was determined by HPLC analysis: (Chiralcel IF column, 1.0 mL/min, hexane/isopropanol = 90/10, 210 nm,  $t_{\text{major}} = 7.8$  min (*R*),  $t_{\text{minor}} = 7.6$  min (*S*));  $[\alpha]_{\text{D}}^{20} +22$  (*c* 0.14, CH<sub>3</sub>OH) for 96% ee (*R*). <sup>1</sup>H NMR (300 MHz, CDCl<sub>3</sub>)  $\delta$  2.03 – 2.19 (m, 1H), 2.24 – 2.42 (m, 1H), 4.09 – 4.27 (m, 3H), 6.32 (d, *J* = 2.6 Hz, 1H), 6.60 – 6.70 (m, 1H), 6.75 – 6.84 (m, 1H), 7.19 (d, *J* = 7.1 Hz, 2H), 7.23 – 7.40 (m, 3H). <sup>13</sup>C NMR (126 MHz, CDCl<sub>3</sub>)  $\delta$  31.8, 41.4, 64.0, 115.3, 116.4, 117.5, 125.4, 126.6, 128.5, 128.6, 145.4, 149.0, 149.2. HRMS (ESI) calcd for C<sub>15</sub>H<sub>15</sub>O<sub>2</sub><sup>+</sup> [M+H]<sup>+</sup> 227.1067, found 227.1064.

(R)-4-Phenyl-1-oxaspiro[4.5]deca-6,9-diene-2,8-dione (**13**)

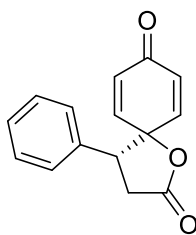

**Compound 13.** (95% yield, 99% ee). Pale yellow solid, 45.6 mg at 0.20 mmol scale. The ee of **13** was determined by HPLC analysis: (Chiralcel IF column, 1.0 mL/min, hexane/isopropanol = 80/20, 210 nm,  $t_{\text{major}} = 14.6$  min (*R*),  $t_{\text{minor}} = 16.5$  min (*S*));  $[\alpha]_{\text{D}}^{20} +43$  (*c* 0.57, CH<sub>3</sub>OH) for 99% ee (*R*). <sup>1</sup>H NMR (400 MHz, CDCl<sub>3</sub>)  $\delta$  3.05 – 3.15 (m, 1H), 3.17 – 3.29 (m, 1H), 3.88 (dd, *J* = 10.9, 8.6 Hz, 1H), 6.02 (dd, *J* = 10.3, 1.9 Hz, 1H), 6.37 (dd, *J* = 10.1, 1.9 Hz, 1H), 6.61 (dd, *J* = 10.3, 3.2 Hz, 1H), 6.98 (dd, *J* = 10.1, 3.2 Hz, 1H), 7.07 – 7.17 (m, 2H), 7.30 – 7.36 (m, 3H). <sup>13</sup>C NMR (75 MHz, CDCl<sub>3</sub>)  $\delta$  32.8, 50.0, 81.8, 127.4, 128.7, 128.9, 130.2, 130.5, 133.6, 143.0, 145.6, 174.2, 184.2. HRMS (ESI) calcd for C<sub>15</sub>H<sub>13</sub>O<sub>3</sub><sup>+</sup> [M+H]<sup>+</sup> 241.0859, found 241.0865.

(9R,9aR)-9a-Methoxy-9-(2-oxo-2-phenylethyl)-9,9a-dihydro-3H-fluoren-3-one (**15**)

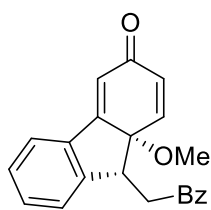

**Compound 15.** (93% yield, dr = 19:1, 96% ee). Pale yellow solid, 61.4 mg at 0.20 mmol scale. The ee of **15** was determined by HPLC analysis: (Chiralcel IF column, 1.0 mL/min, hexane/isopropanol = 80/20, 254 nm,  $t_{\text{major}} = 7.3$  min (*R*),  $t_{\text{minor}} = 8.8$  min (*S*));  $[\alpha]_{\text{D}}^{20} -69$  (*c* 0.29, CH<sub>3</sub>OH) for 96% ee (*R*). <sup>1</sup>H NMR (500 MHz, *d*<sub>6</sub>-DMSO)  $\delta$  2.67 (d, *J* = 14.0 Hz, 1H), 2.95 (s, 3H), 3.17 (dd, *J* = 13.9, 8.4 Hz, 1H), 4.01 (d, *J* = 8.2 Hz, 1H), 6.30 (dd, *J* = 9.9, 1.6 Hz, 1H), 6.76 (d, *J* = 1.5 Hz, 1H), 6.94 (dd, *J* = 6.5, 2.9 Hz, 2H), 7.13 – 7.21 (m, 3H), 7.24 (d, *J* = 7.3 Hz, 1H), 7.33 – 7.42 (m, 2H), 7.48 (d, *J* = 9.9 Hz, 1H), 7.89 (d, *J* = 7.3 Hz, 1H). <sup>13</sup>C NMR (126 MHz, *d*<sub>6</sub>-DMSO)  $\delta$  48.1, 50.3, 50.7, 87.1, 111.9, 120.5, 123.5, 126.0, 126.1, 128.0, 128.5, 129.9, 132.2, 136.4, 141.4, 144.9, 149.2, 160.0, 186.8. HRMS (ESI) calcd for C<sub>22</sub>H<sub>18</sub>NaO<sub>3</sub><sup>+</sup> [M+Na]<sup>+</sup> 353.1148, found 353.1154.

**Tolterodine**<sup>[5]</sup>

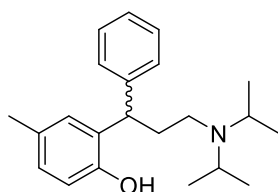

**(S)-Tolterodine.** (97% yield, >99% ee). Colorless oil, 63.0 mg at 0.20 mmol scale. The ee of **(S)-Tolterodine** was determined by HPLC analysis: (Chiralcel IC column, 1.0 mL/min, hexane/isopropanol = 99.5/0.5, 210 nm,  $t_{\text{major}} = 9.2$

min (*S*);  $[\alpha]_{\text{D}}^{20} -27$  (*c* 0.23, MeOH) for 99% ee. [lit.<sup>[5]</sup> value for the *S* enantiomer:  $[\alpha]_{\text{D}}^{20} -27$  (*c* 1.0, CH<sub>3</sub>OH).] **(*R*)-Tolterodine**. (86% yield, 99% ee). Colorless oil, 55.9 mg at 0.20 mmol scale. The ee of **(*R*)-Tolterodine** was determined by HPLC analysis: (Chiralcel IC column, 1.0 mL/min, hexane/isopropanol = 99.5/0.5, 210 nm,  $t_{\text{major}} = 9.9$  min (*R*),  $t_{\text{minor}} = 9.4$  min (*S*);  $[\alpha]_{\text{D}}^{20} +25$  (*c* 0.11, MeOH) for 99% ee. [lit.<sup>[5]</sup> value for the *R* enantiomer:  $[\alpha]_{\text{D}}^{20} +26$  (*c* 1.0, CH<sub>3</sub>OH)]. <sup>1</sup>H NMR (400 MHz, CDCl<sub>3</sub>)  $\delta$  1.12 (d, *J* = 6.7 Hz, 6H), 1.17 (d, *J* = 6.7 Hz, 6H), 2.10 – 2.15 (m, 1H), 2.16 (s, 3H), 2.37 – 2.48 (m, 2H), 2.69 – 2.80 (m, 1H), 3.18 – 3.34 (m, 2H), 4.53 (dd, *J* = 11.1, 3.9 Hz, 1H), 6.60 (s, 1H), 6.79 – 6.92 (m, 2H), 7.23 – 7.34 (m, 1H), 7.32 – 7.39 (m, 4H).

## 9. References

- [1] Uson, R.; Oro, L. A.; Cabeza, J. A. *Inorg. Synth.* **1985**, 23, 126.
- [2] (a) Nishimura, T.; Noishiki, A.; Tsui, G. C.; Hayashi, T. *J. Am. Chem. Soc.* **2012**, 134, 5056. (b) Okamoto, K.; Hayashi, T.; Rawal, V. H. *Org. Lett.* **2008**, 10, 4387. (c) Okamoto, K.; Hayashi, T.; Rawal, V. H. *Chem. Commun.* **2009**, 4815.
- [3] Hatano, M.; Nishimura, T. *Angew. Chem. Int. Ed.* **2015**, 54, 10949; *Angew. Chem.* **2015**, 127, 11099.
- [4] (a) Tokunaga, N.; Otomaru, Y.; Okamoto, K.; Ueyama, K.; Shintani, R.; Hayashi, T. *J. Am. Chem. Soc.* **2004**, 126, 13584. (b) Otomaru, Y.; Okamoto, K.; Shintani, R.; Hayashi, T. *J. Org. Chem.* **2005**, 70, 2503. (c) Abele, S.; Inauen, R.; Spielvogel, D.; Moessner, C. *J. Org. Chem.* **2012**, 77, 4765.
- [5] Daniela, B.; Airton, S.; Jason, T.; Carlos, C. *Org. Lett.* **2012**, 14, 6036.

## 10. NMR Spectra

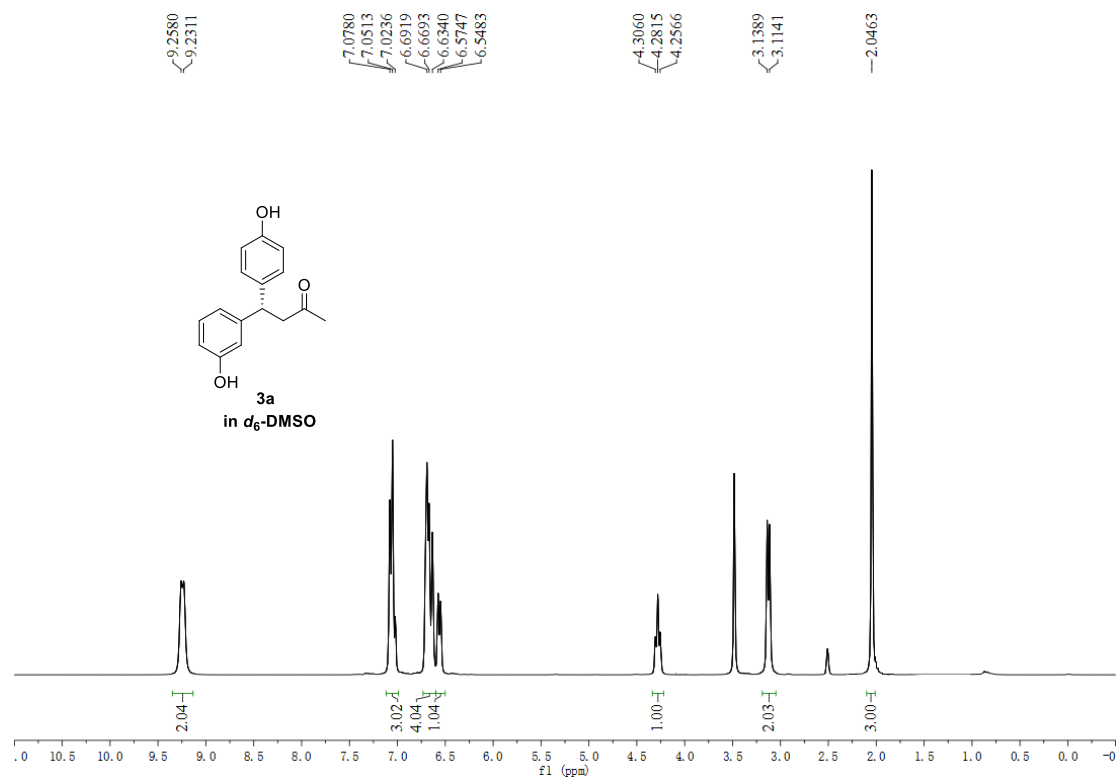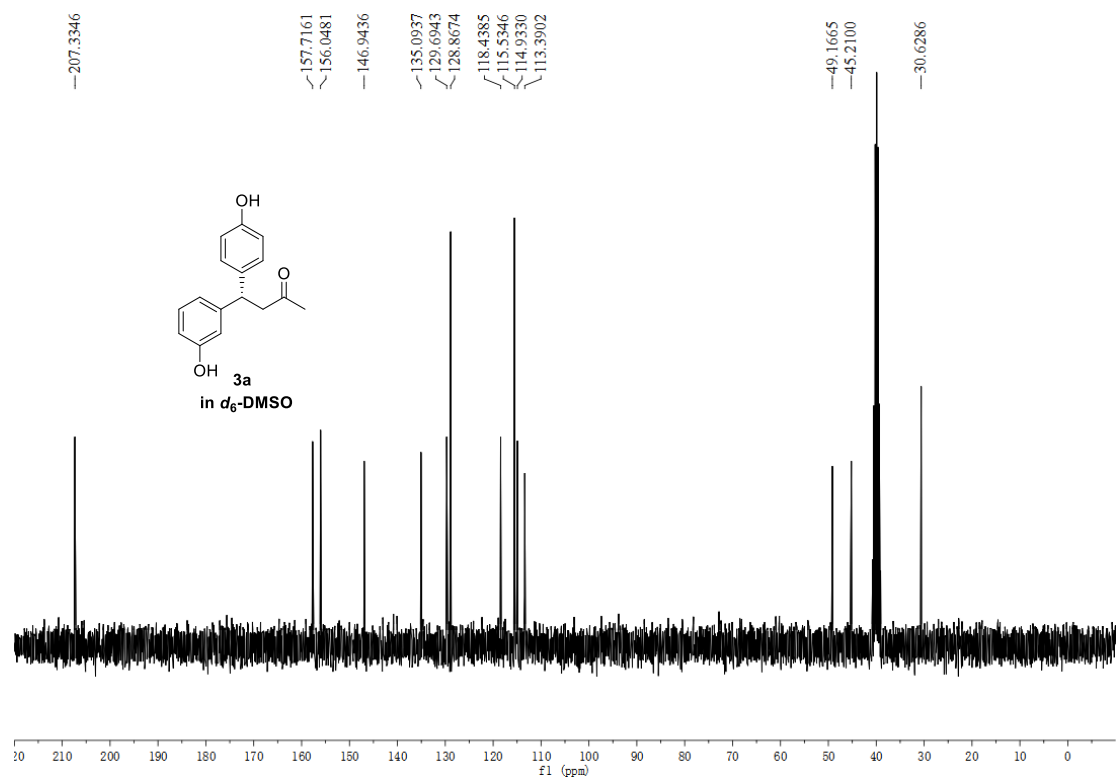

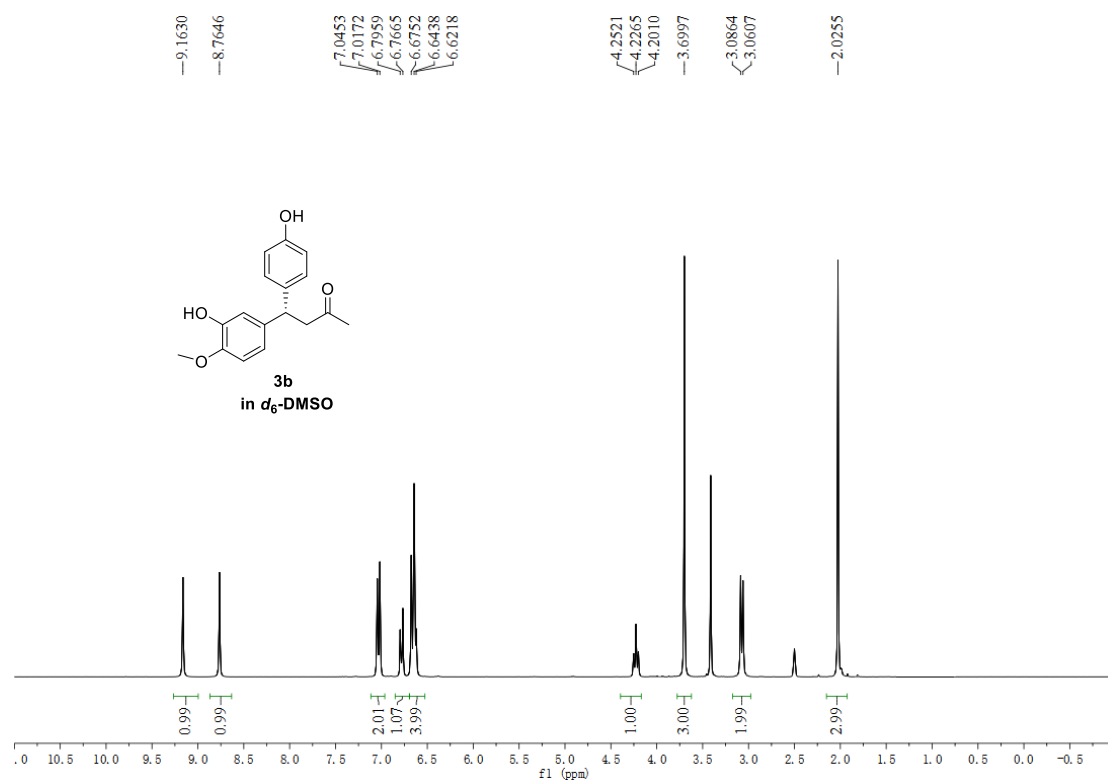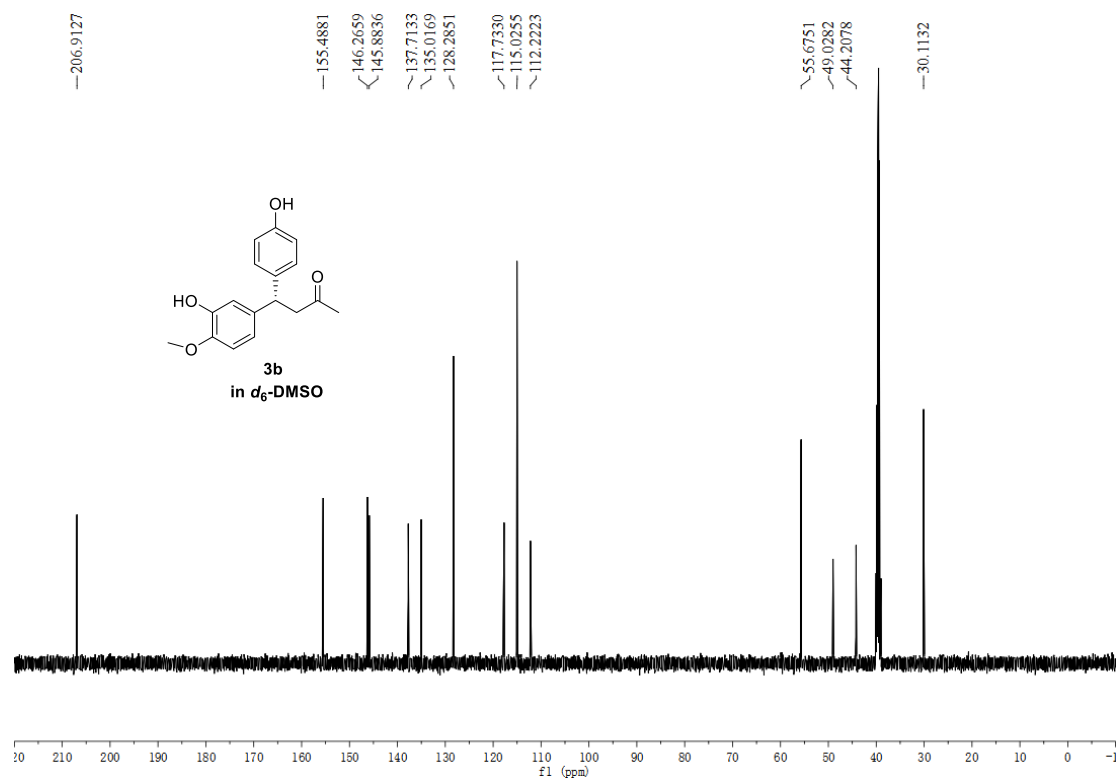

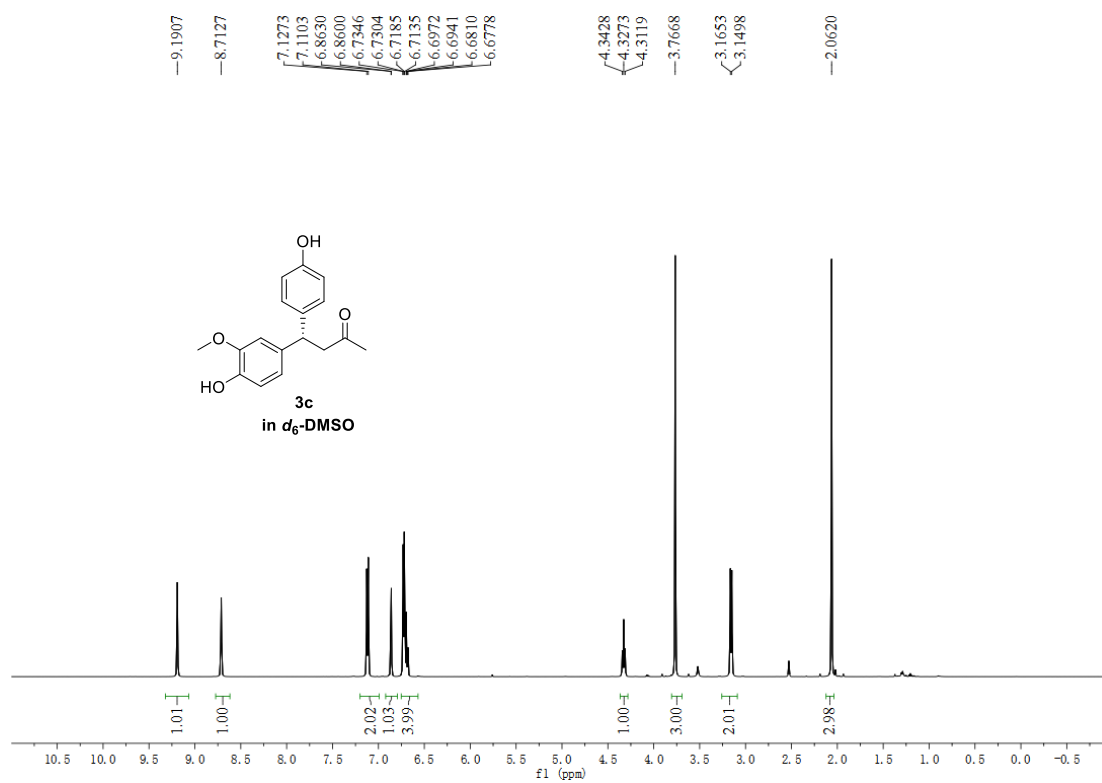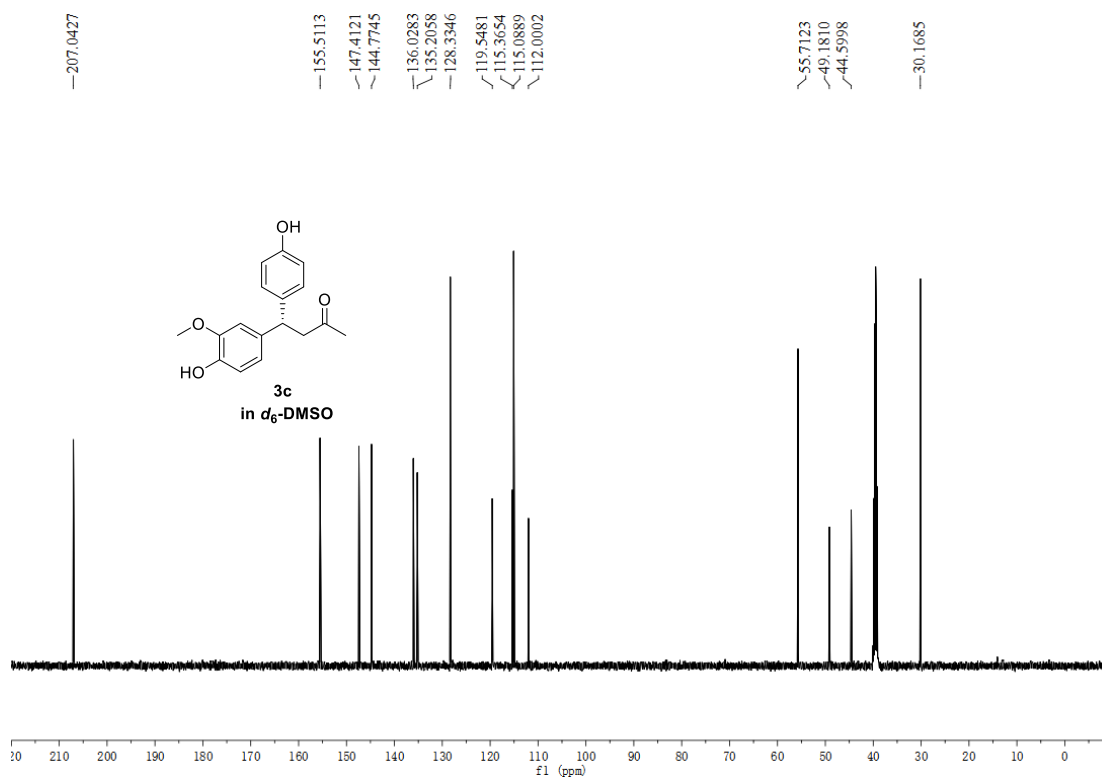

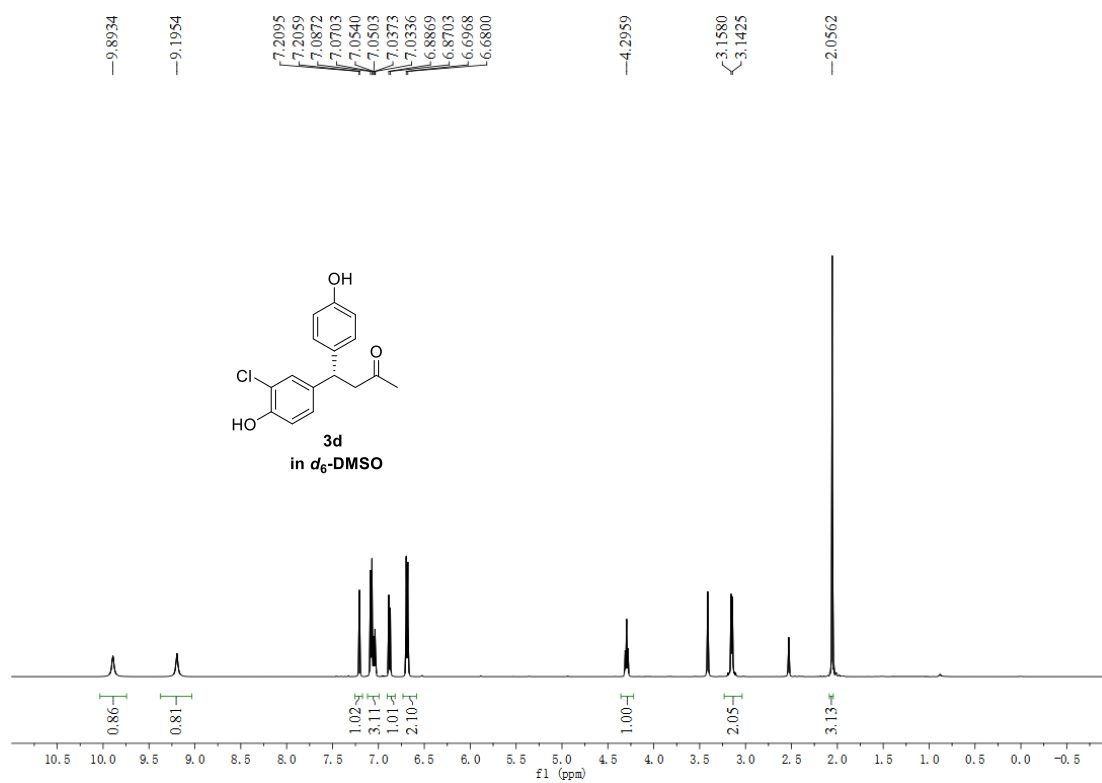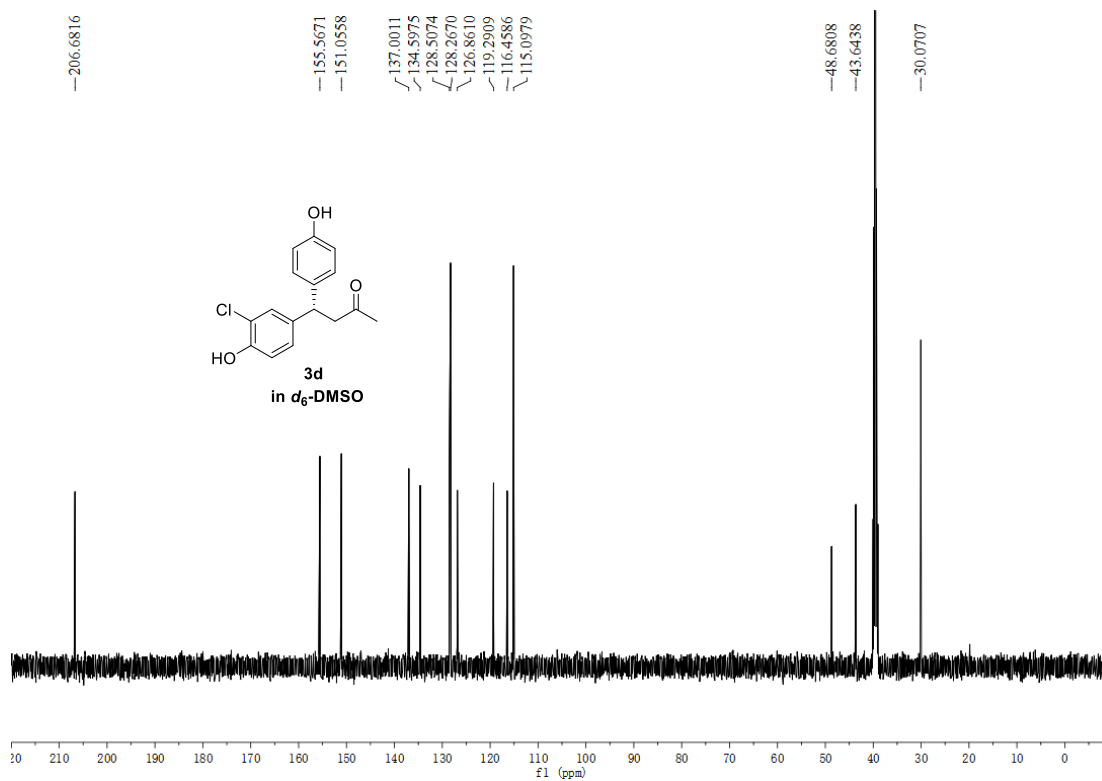

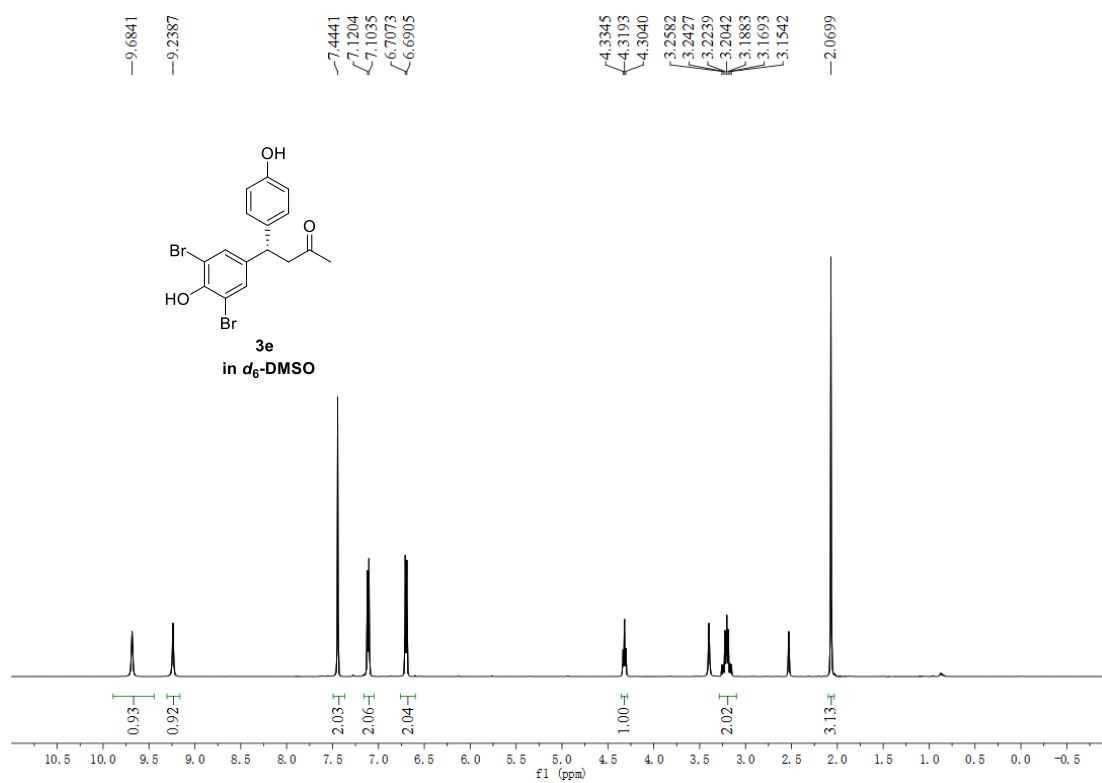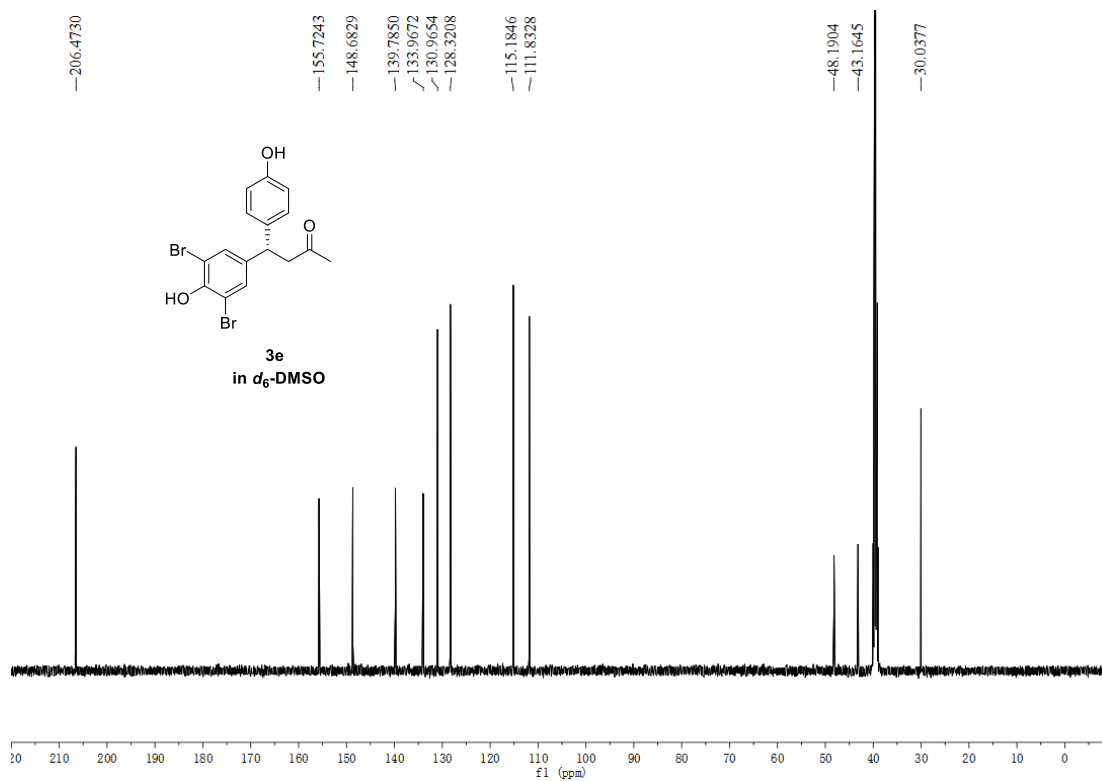

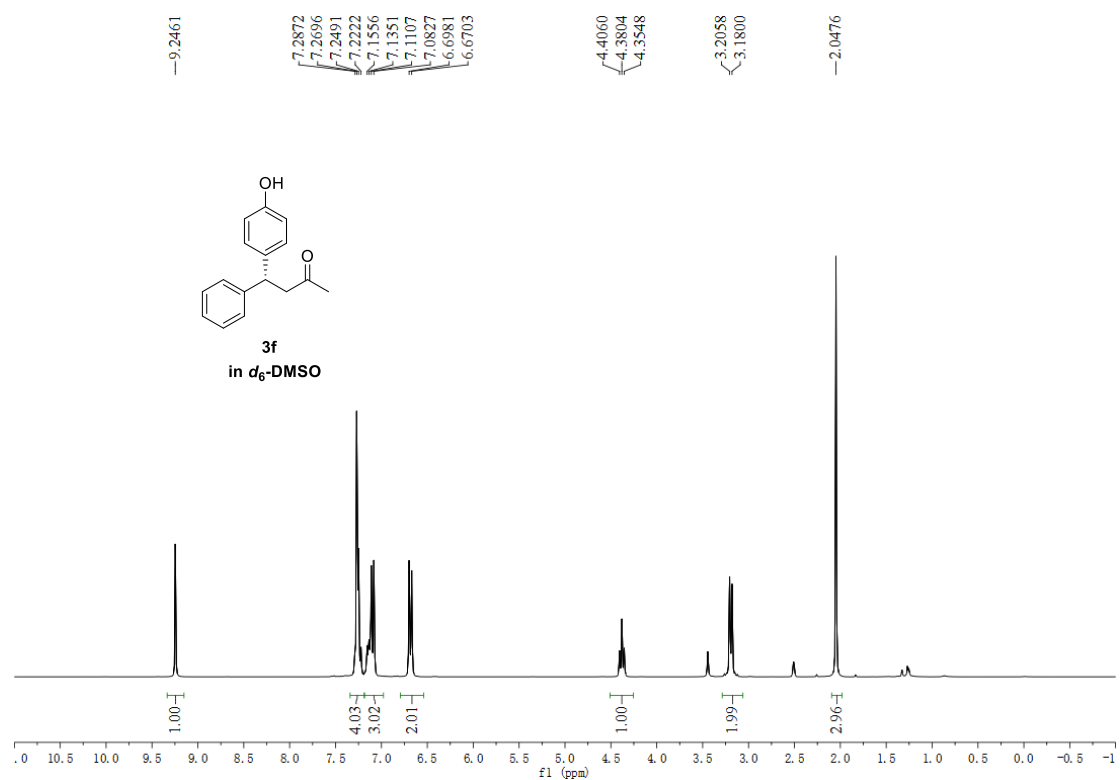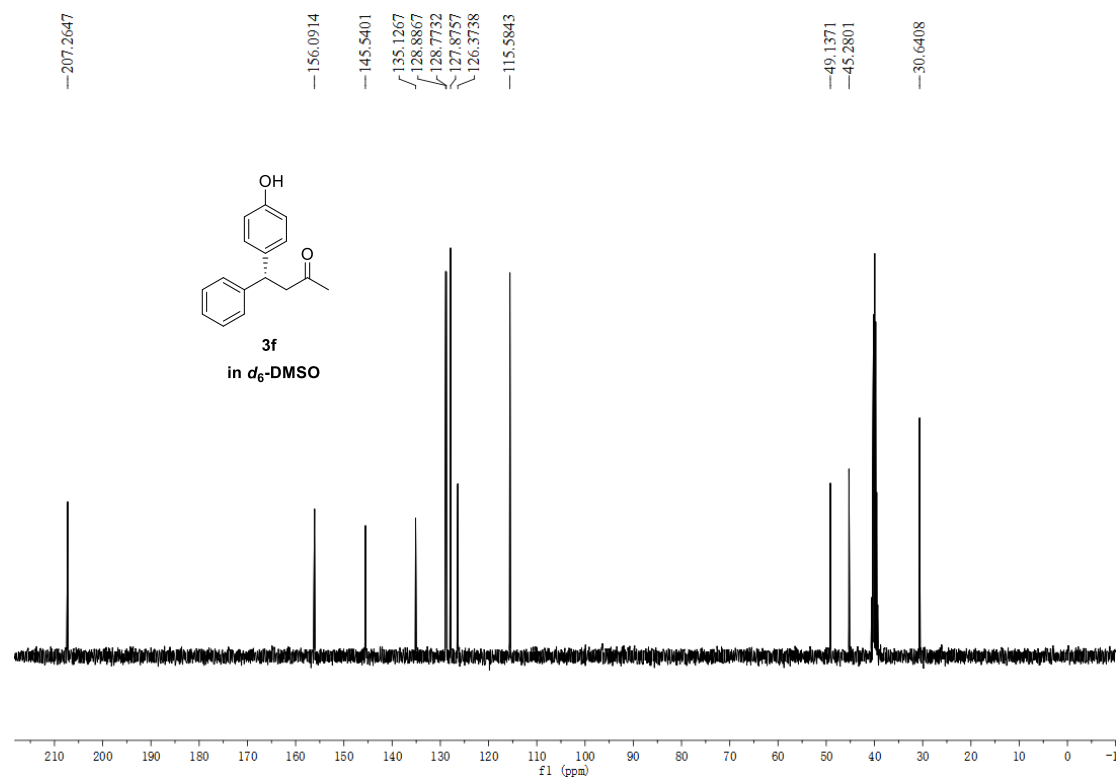

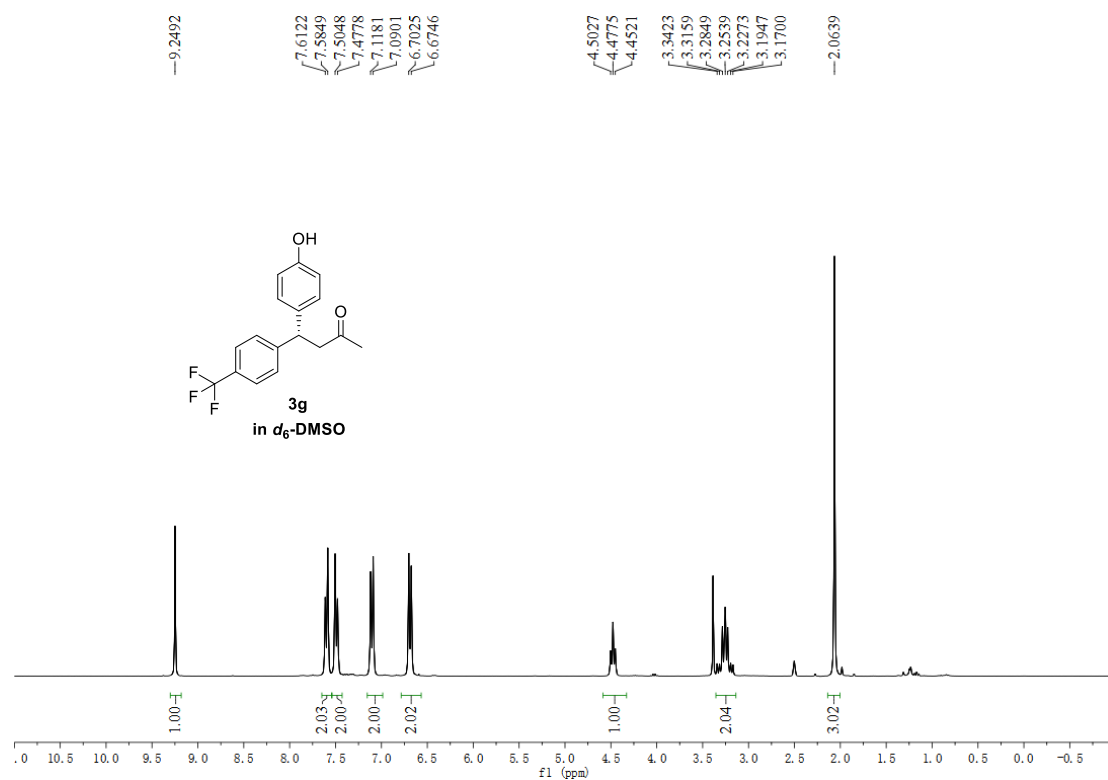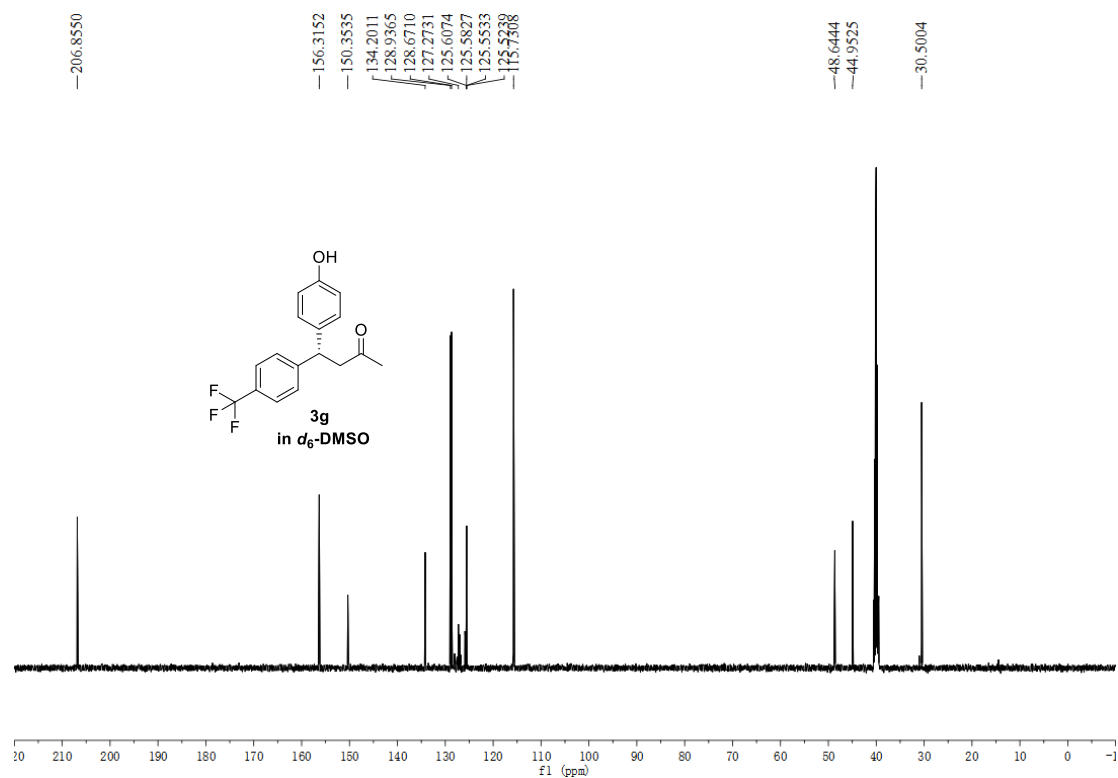

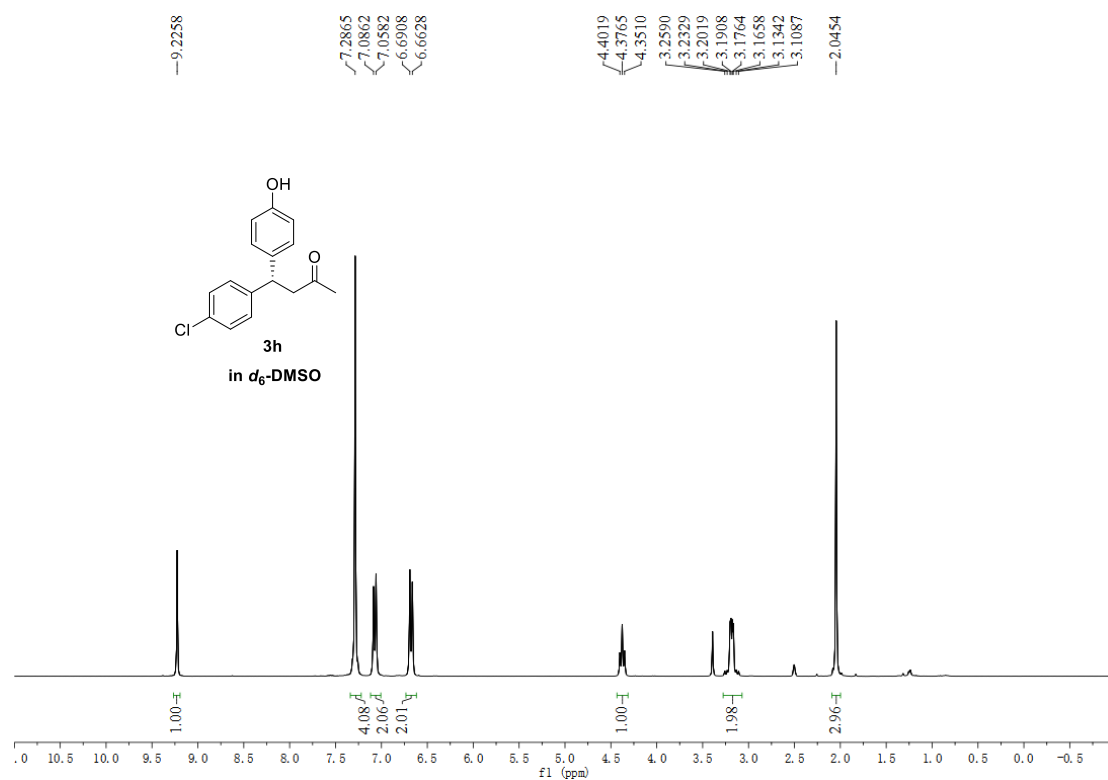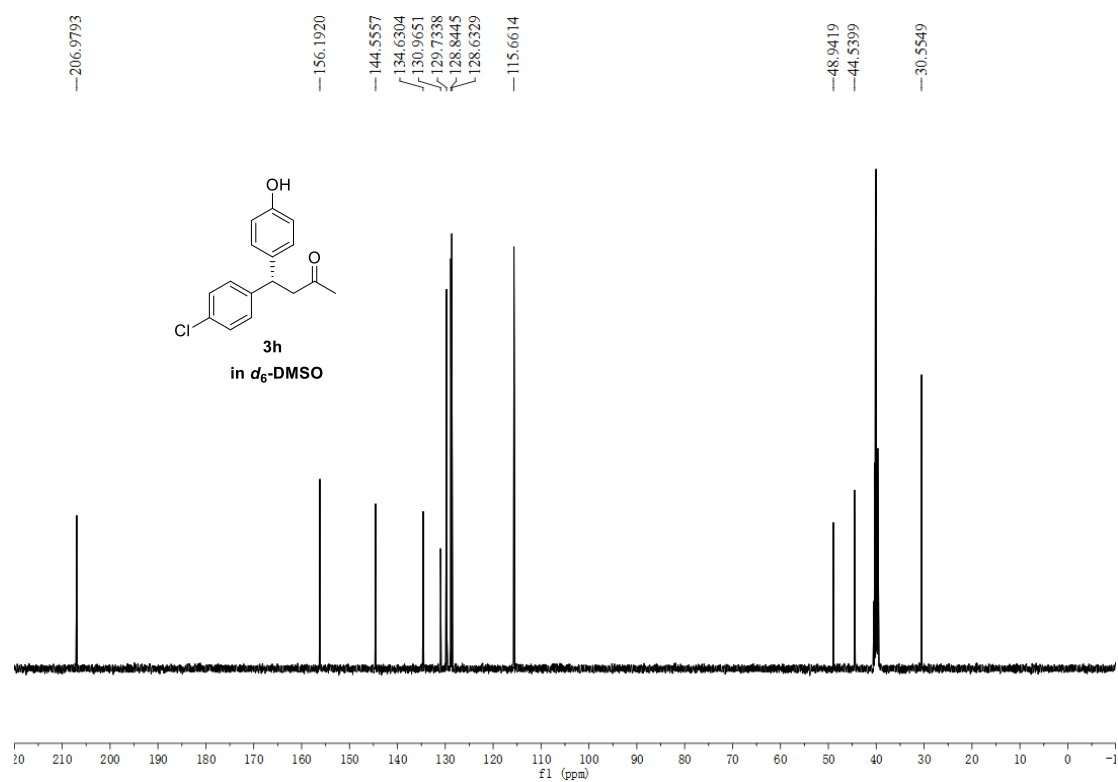

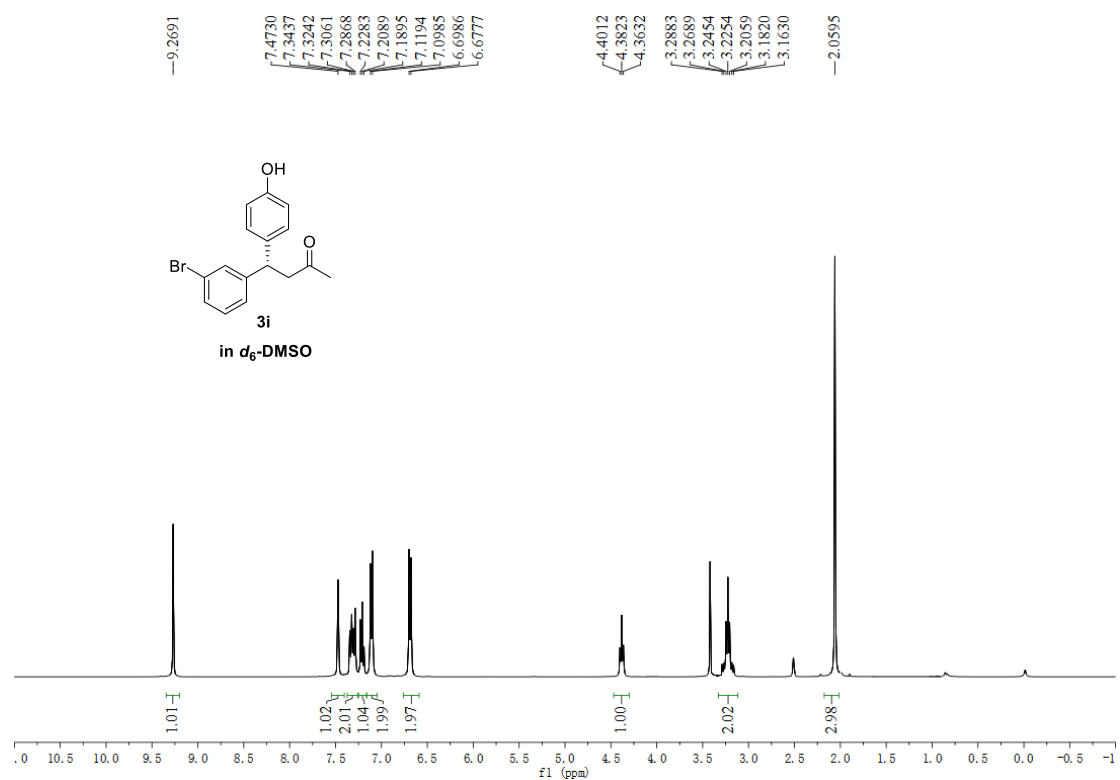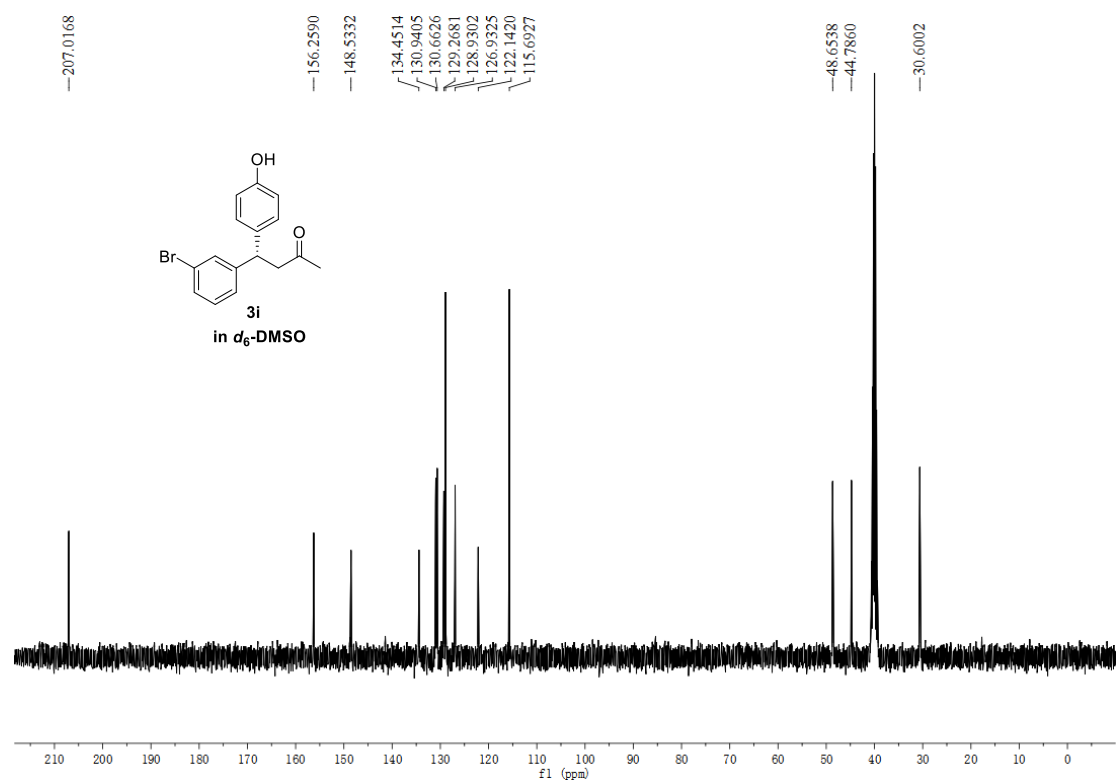

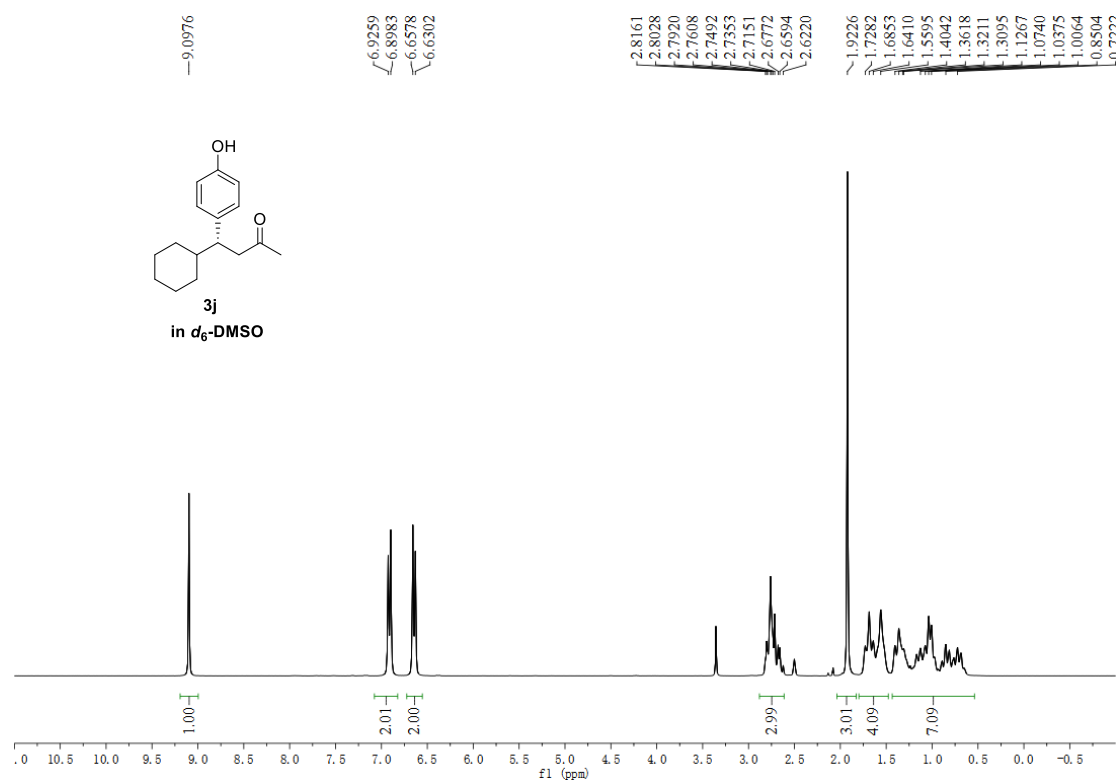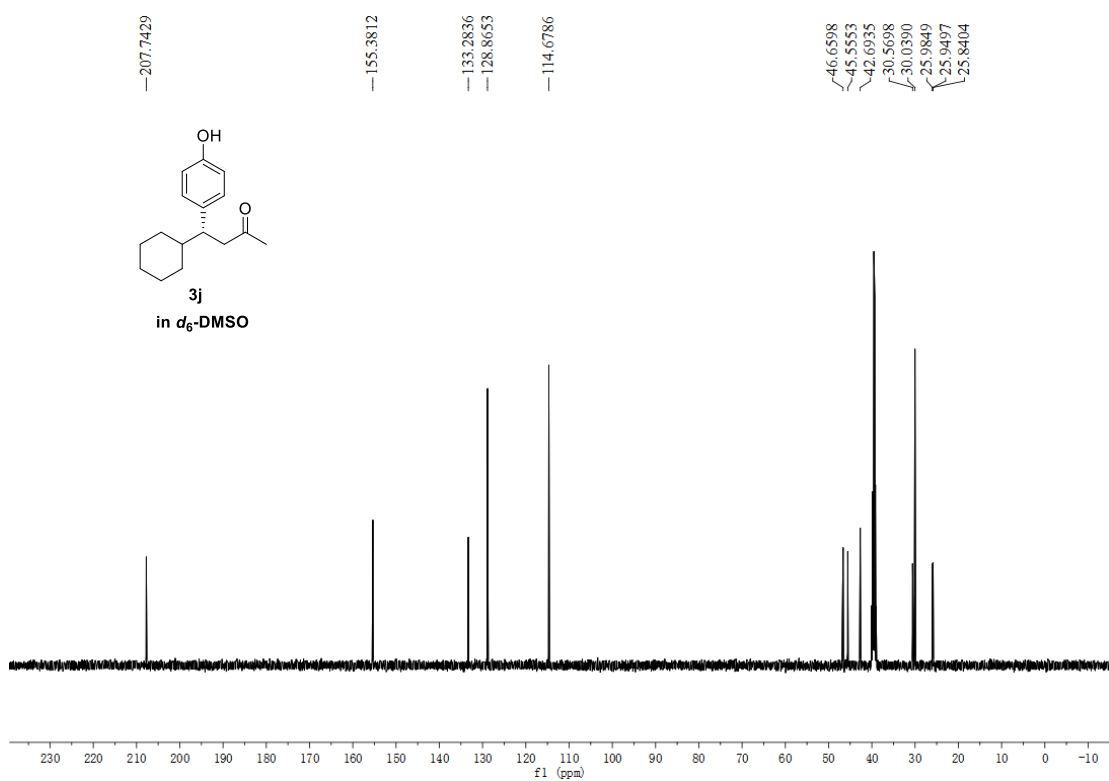

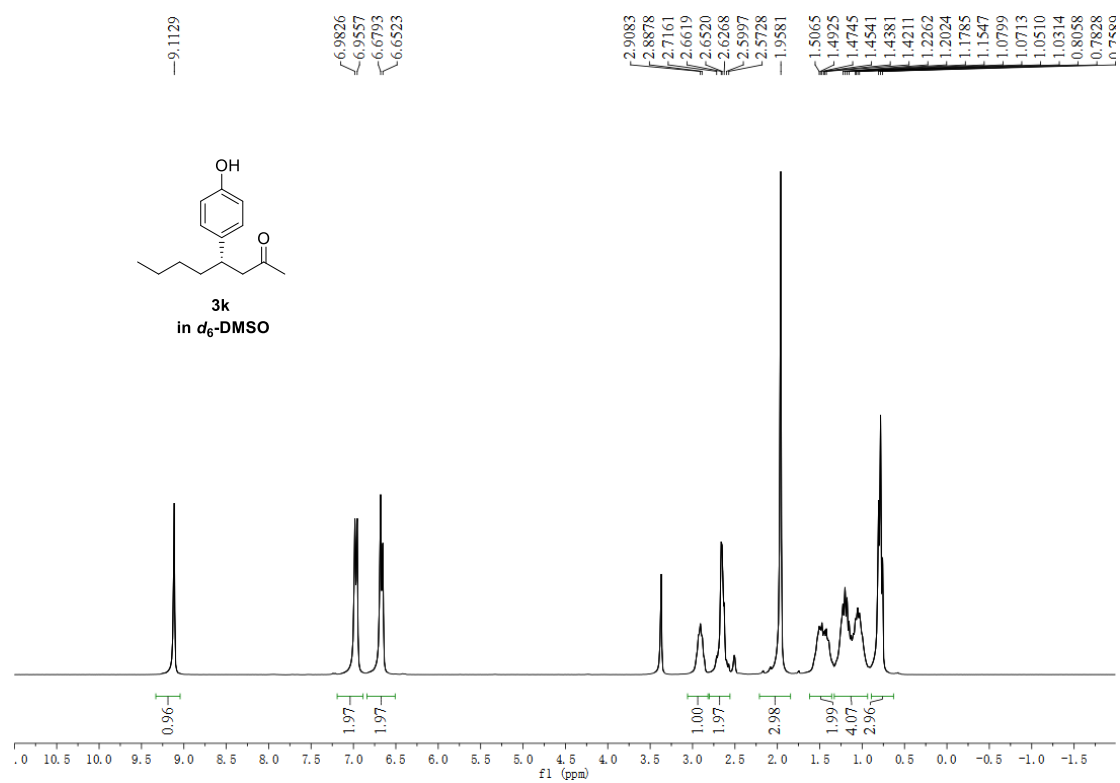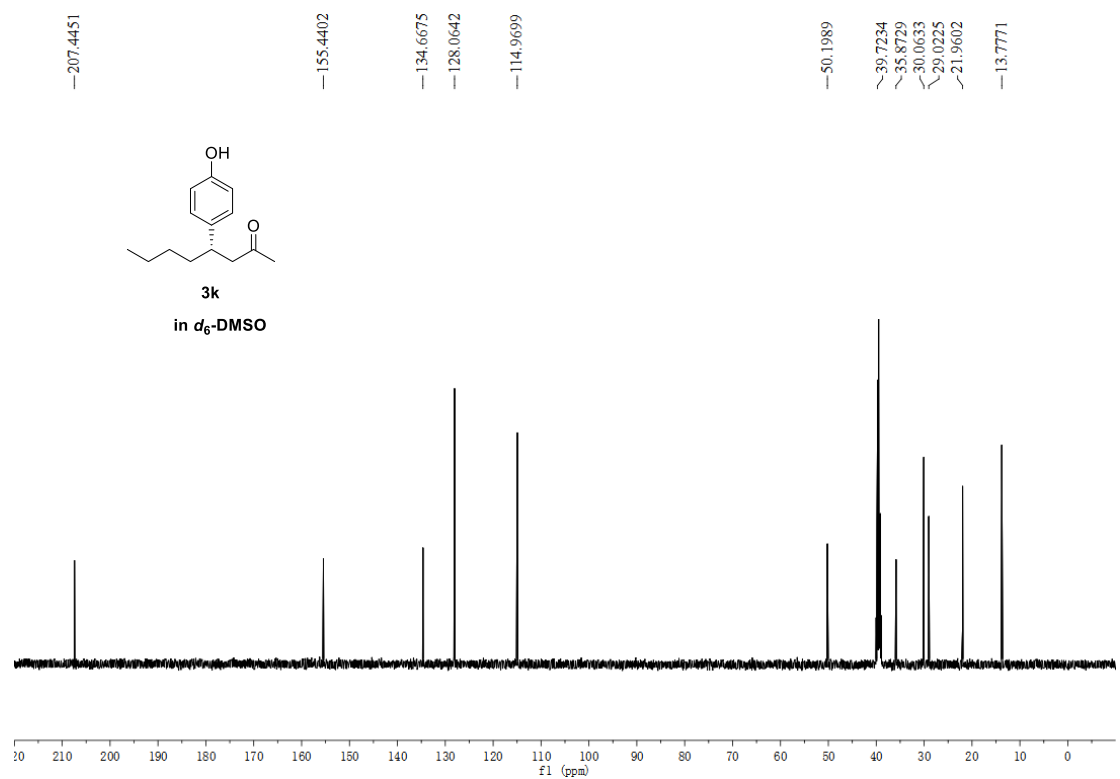

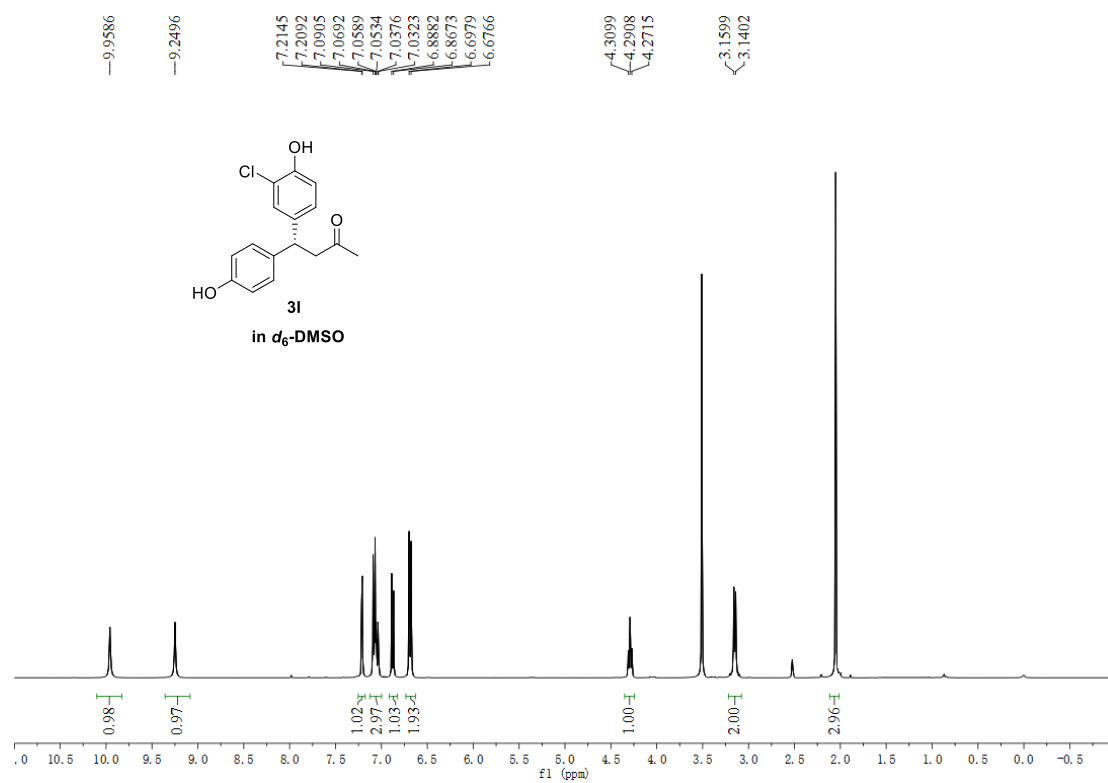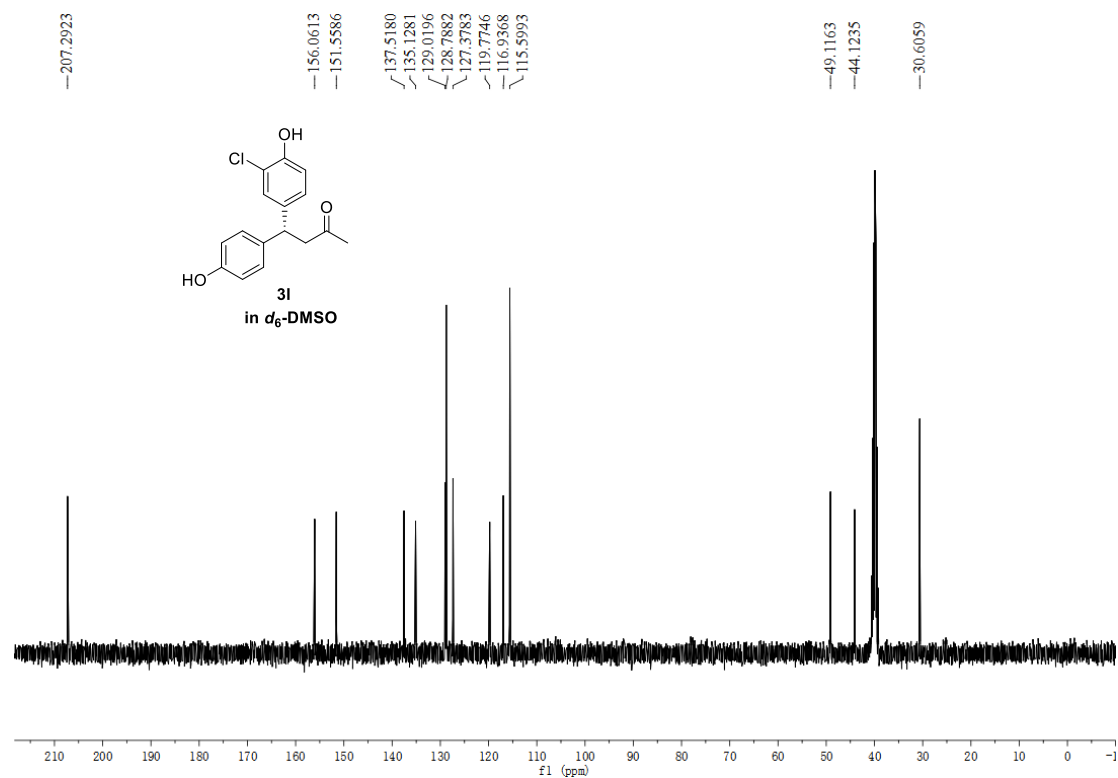

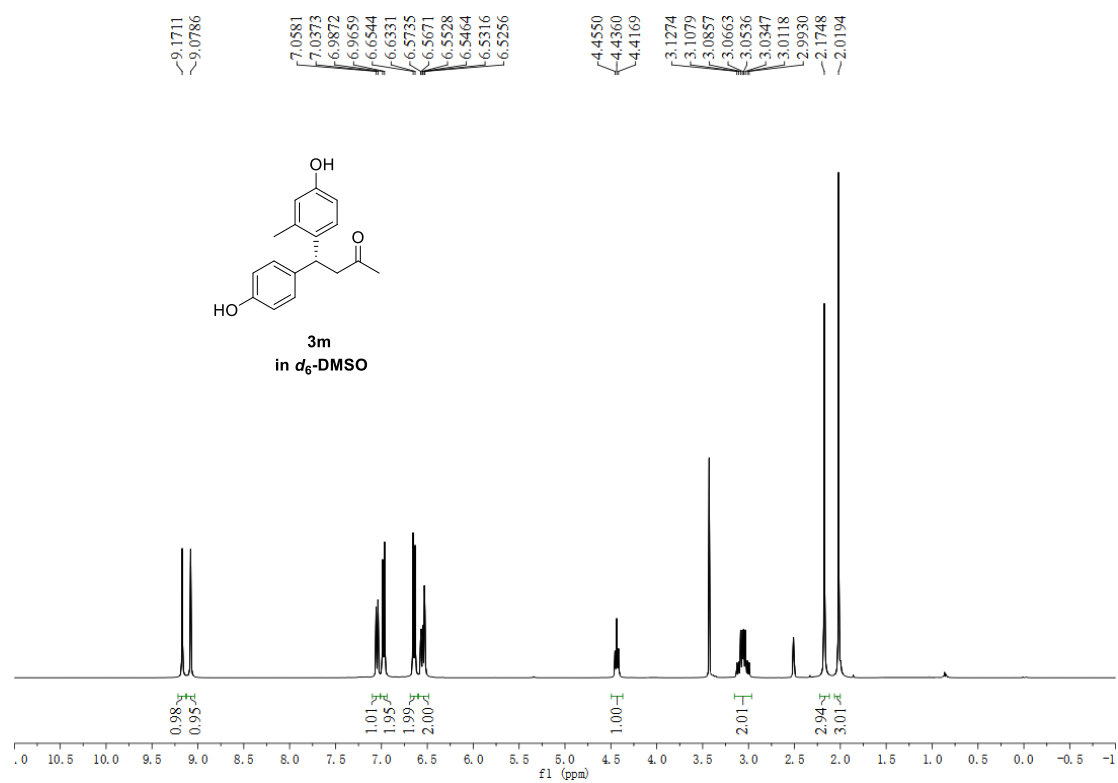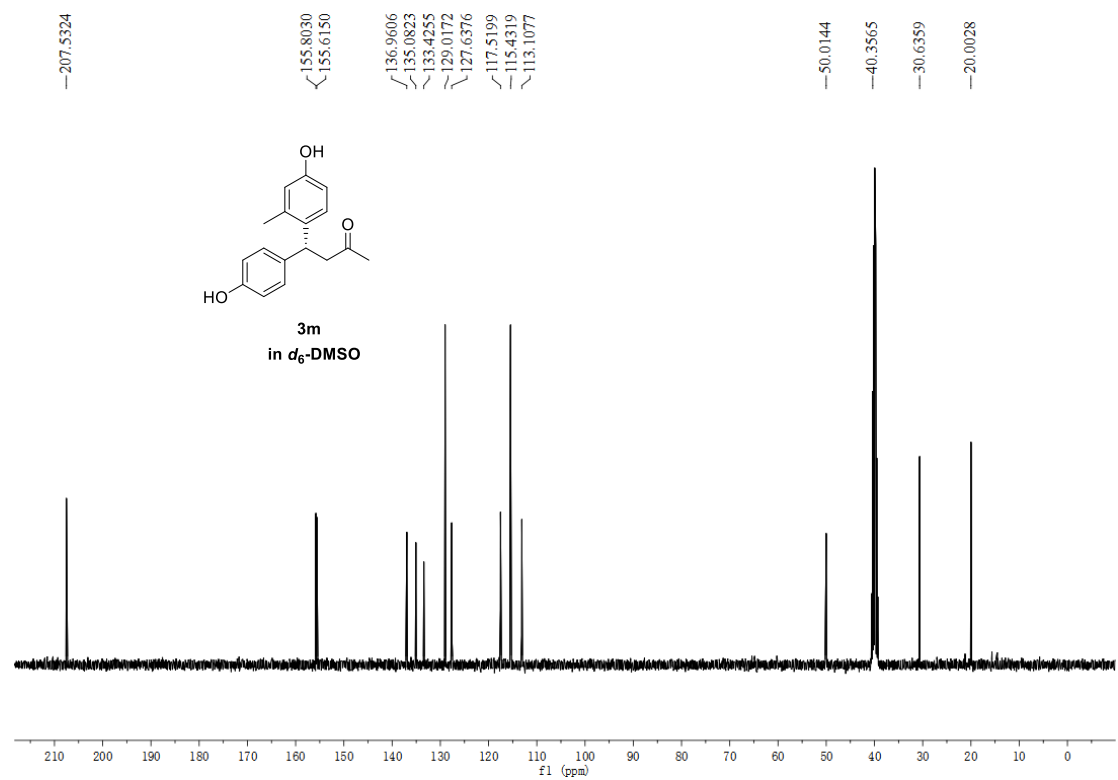

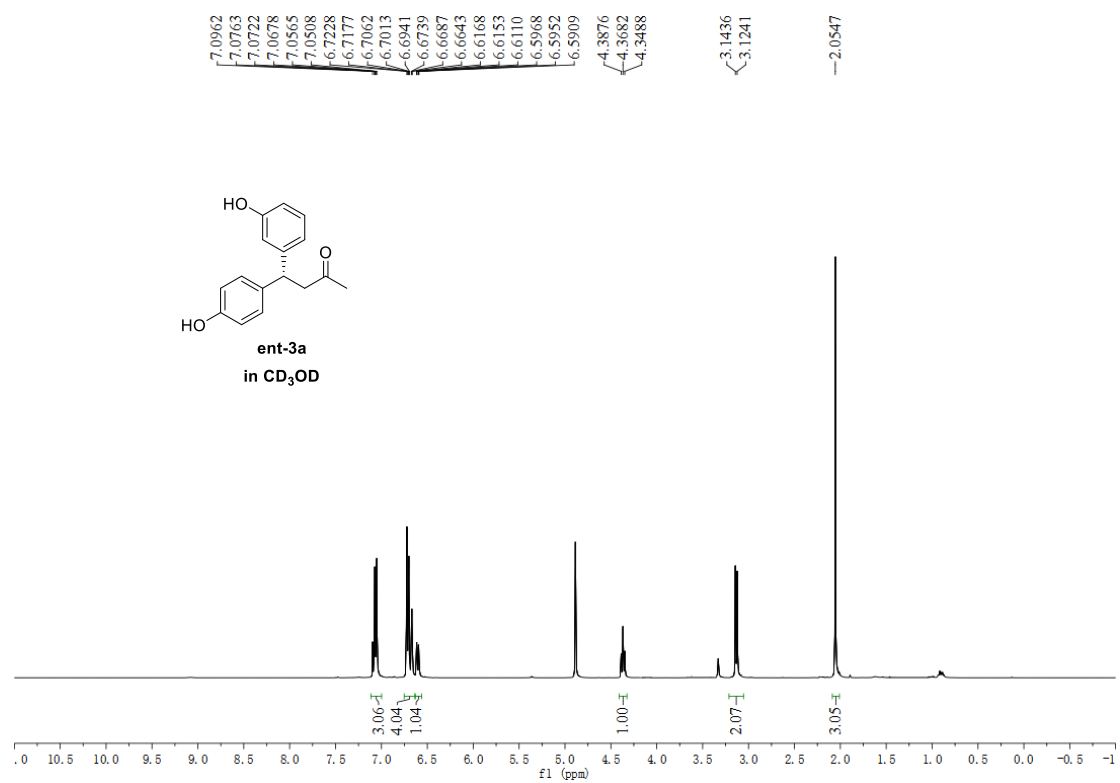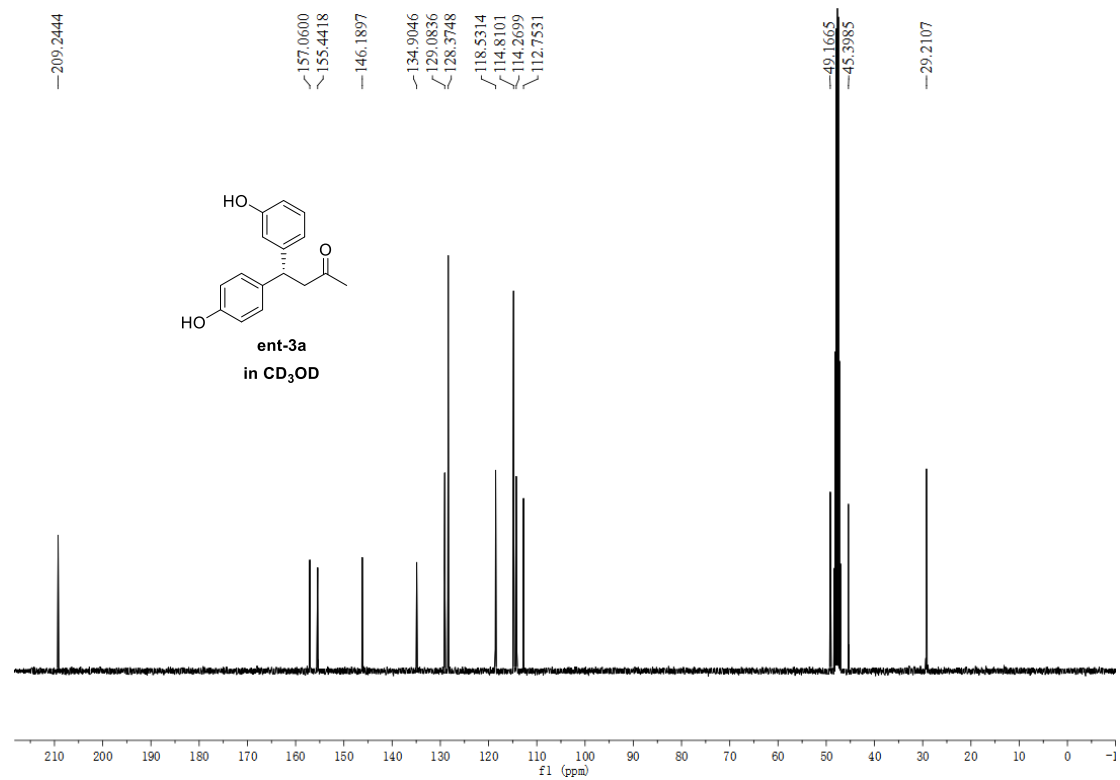

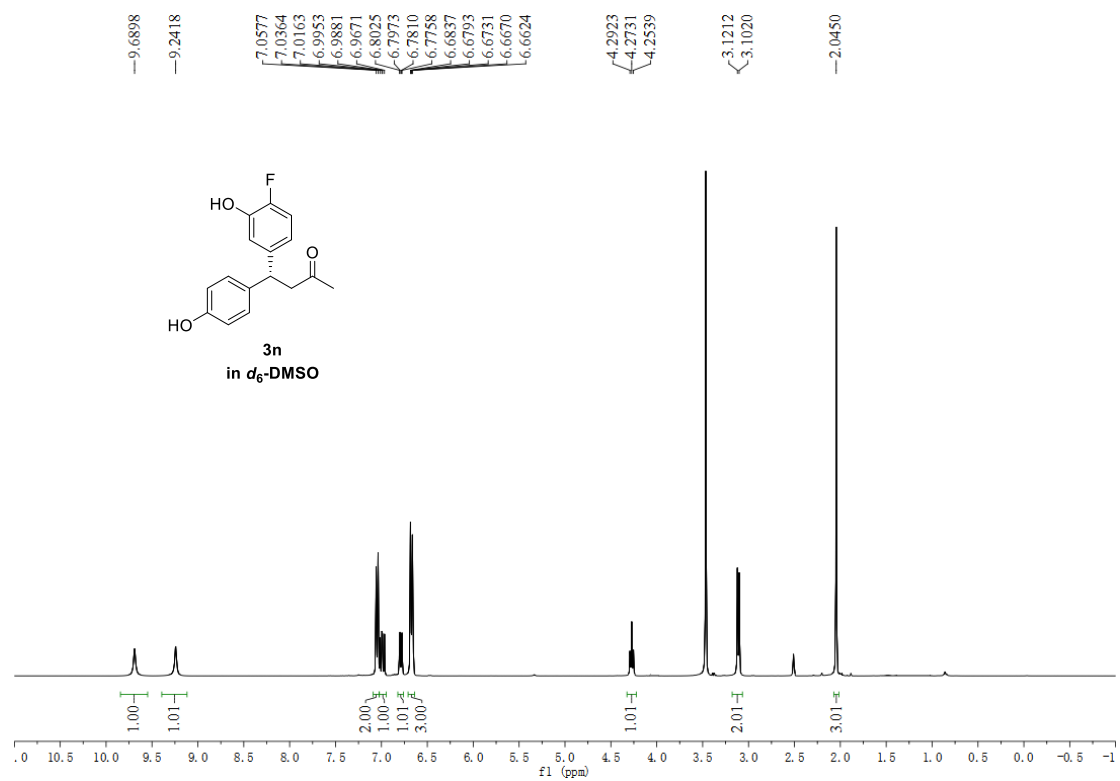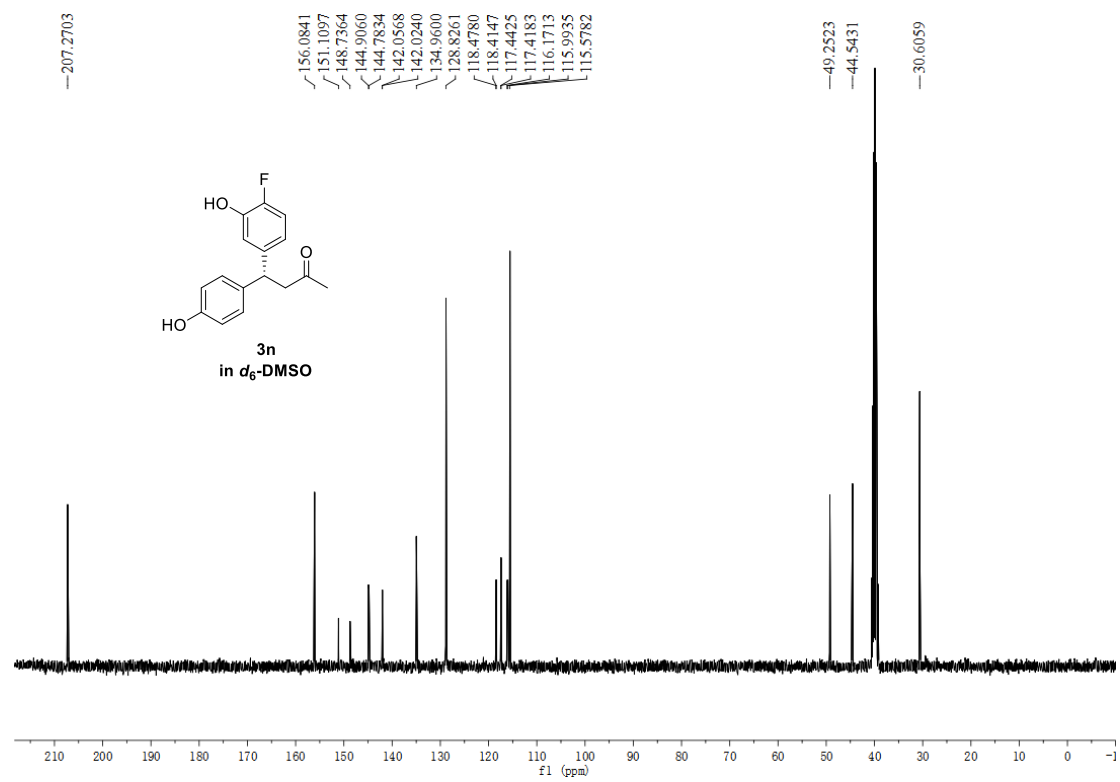

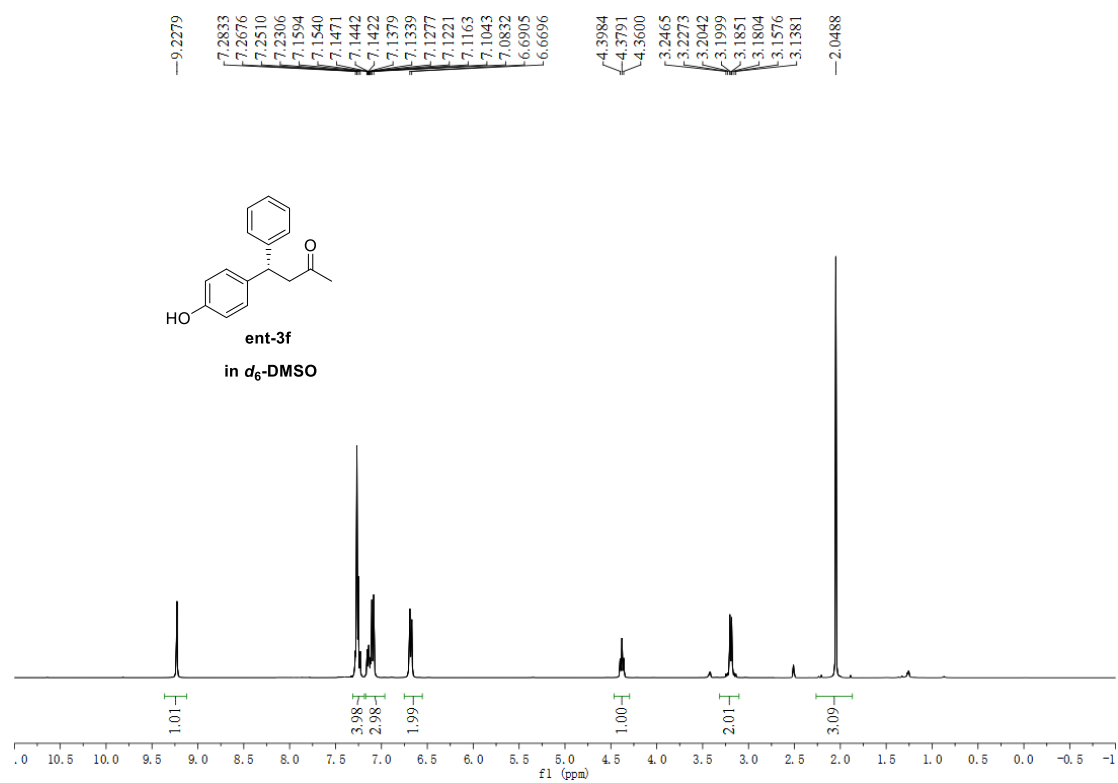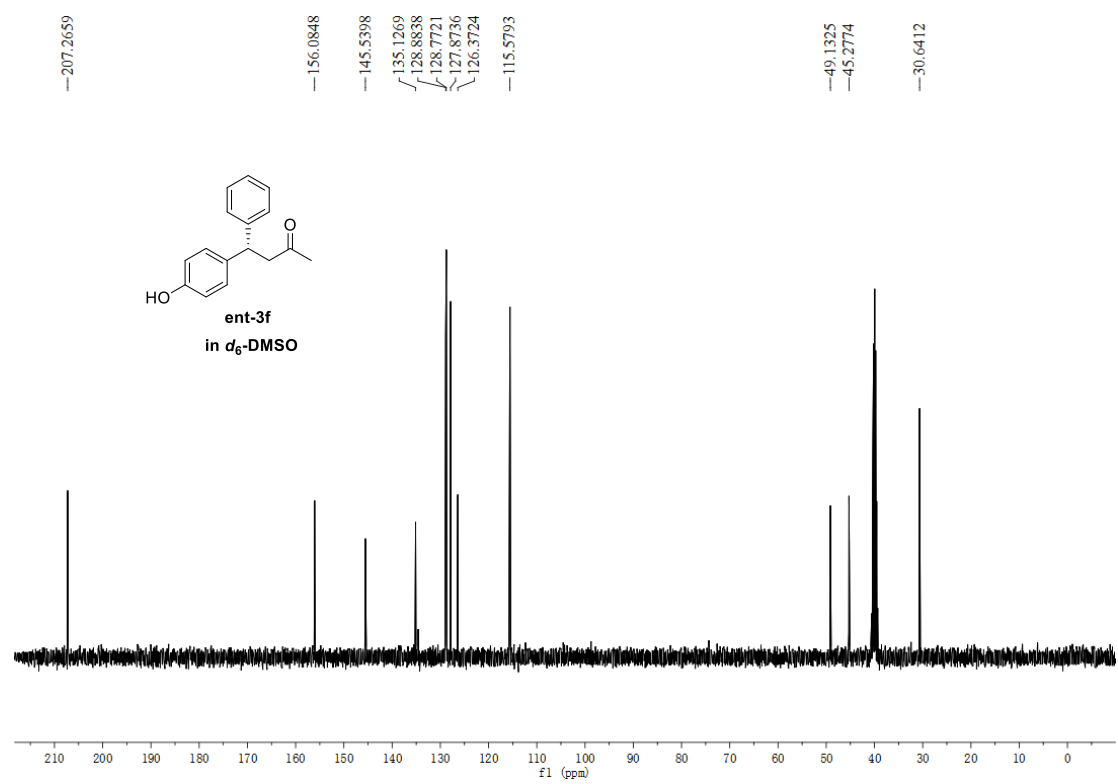

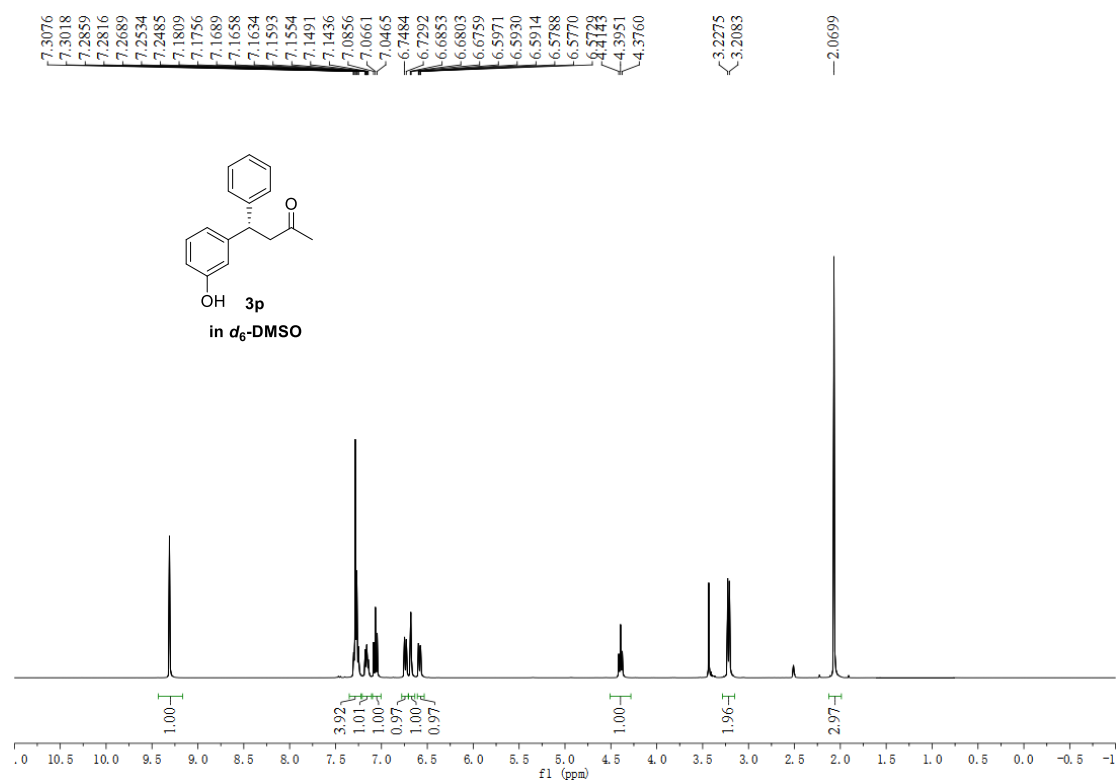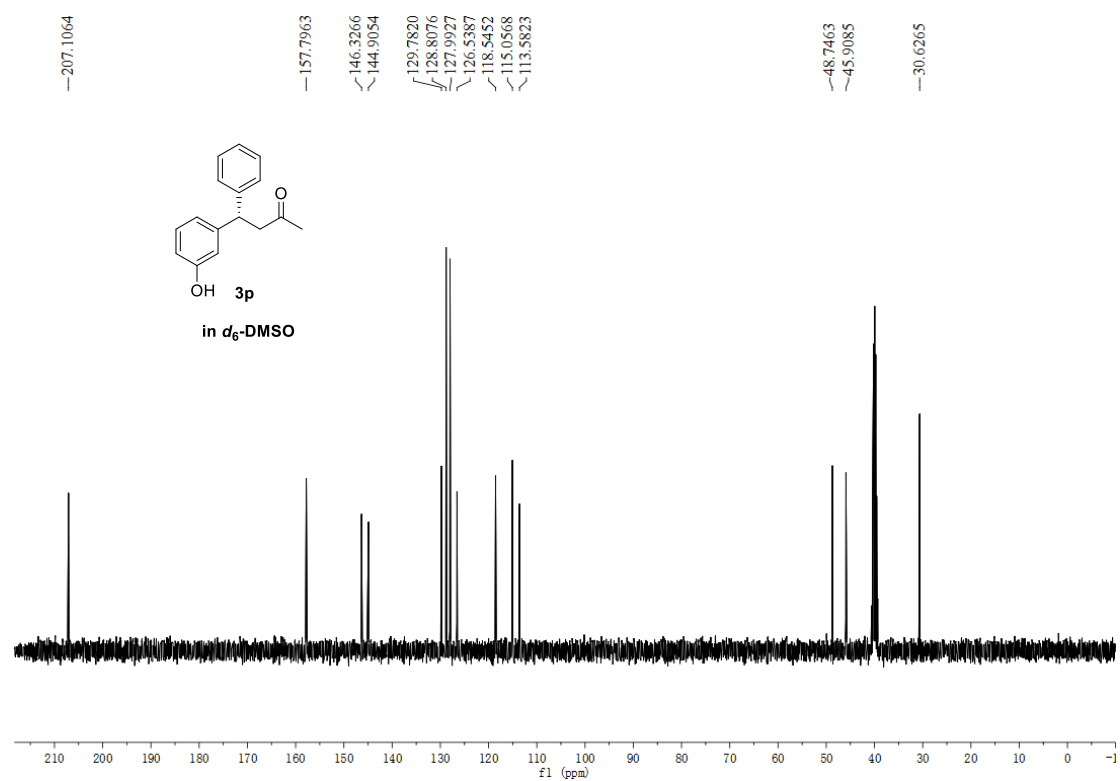

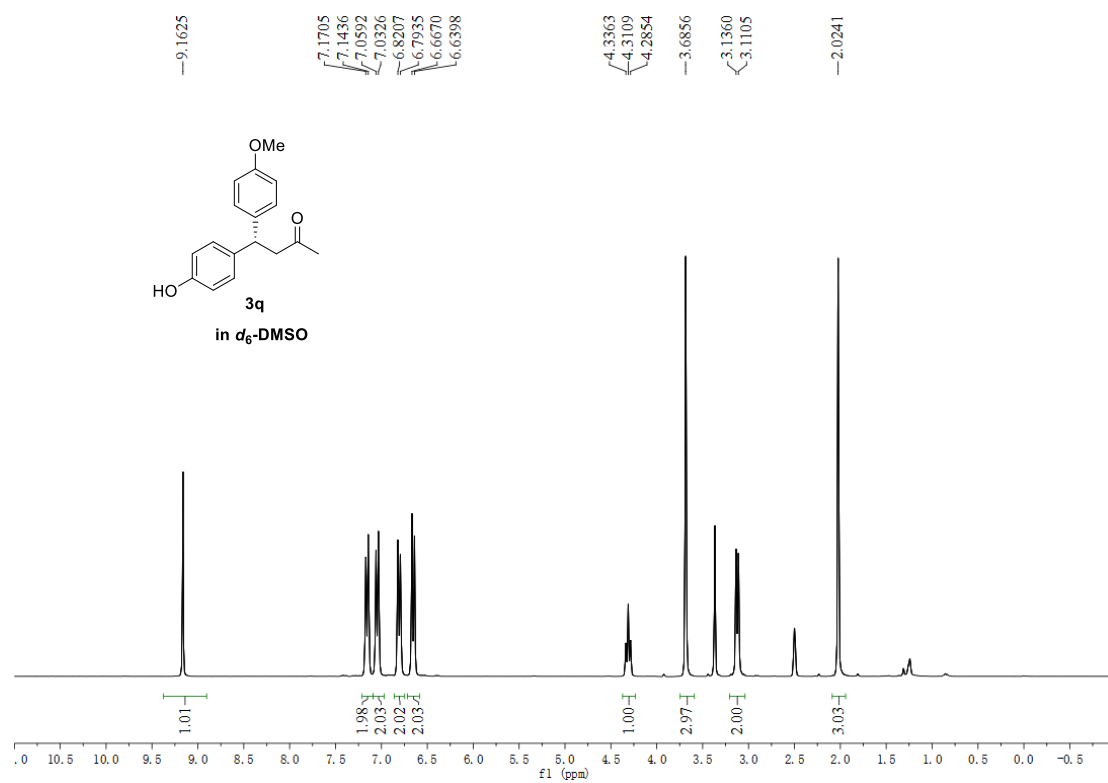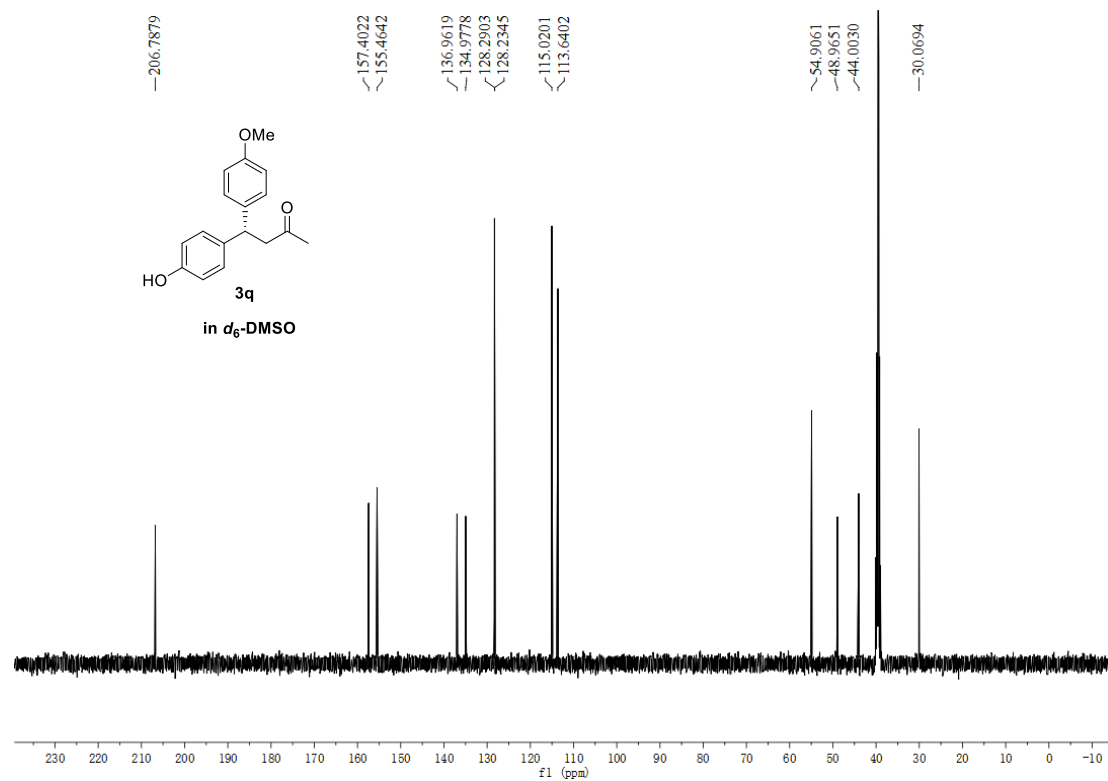

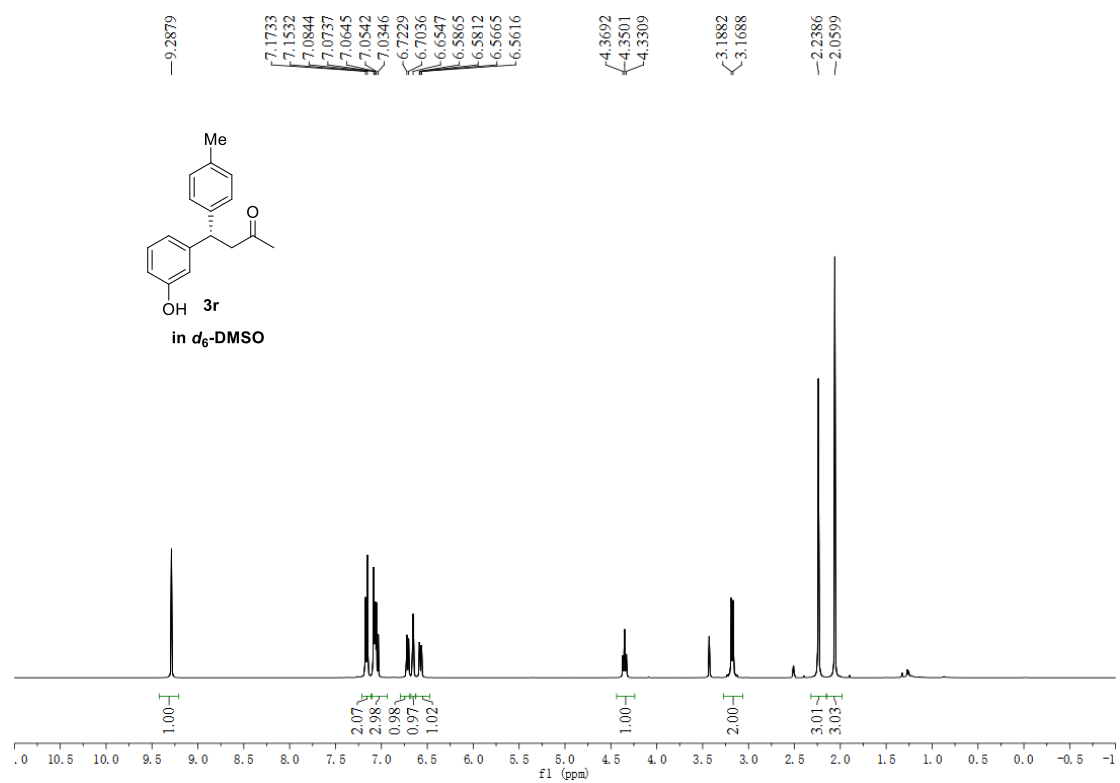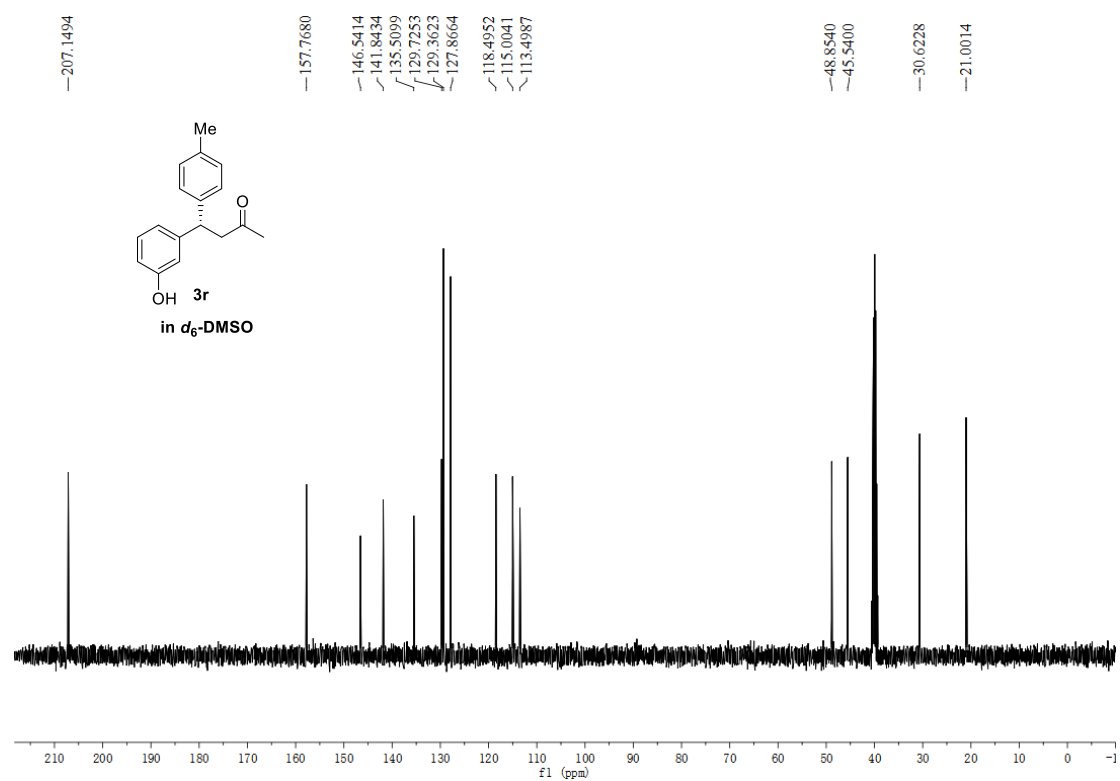

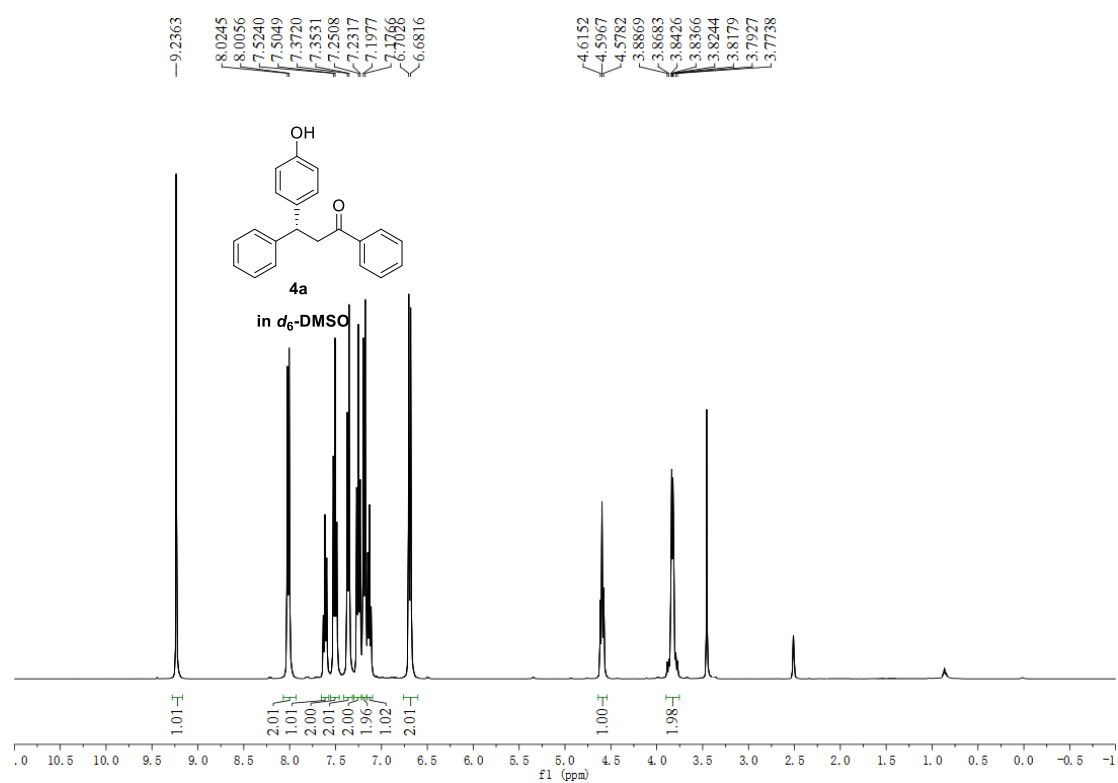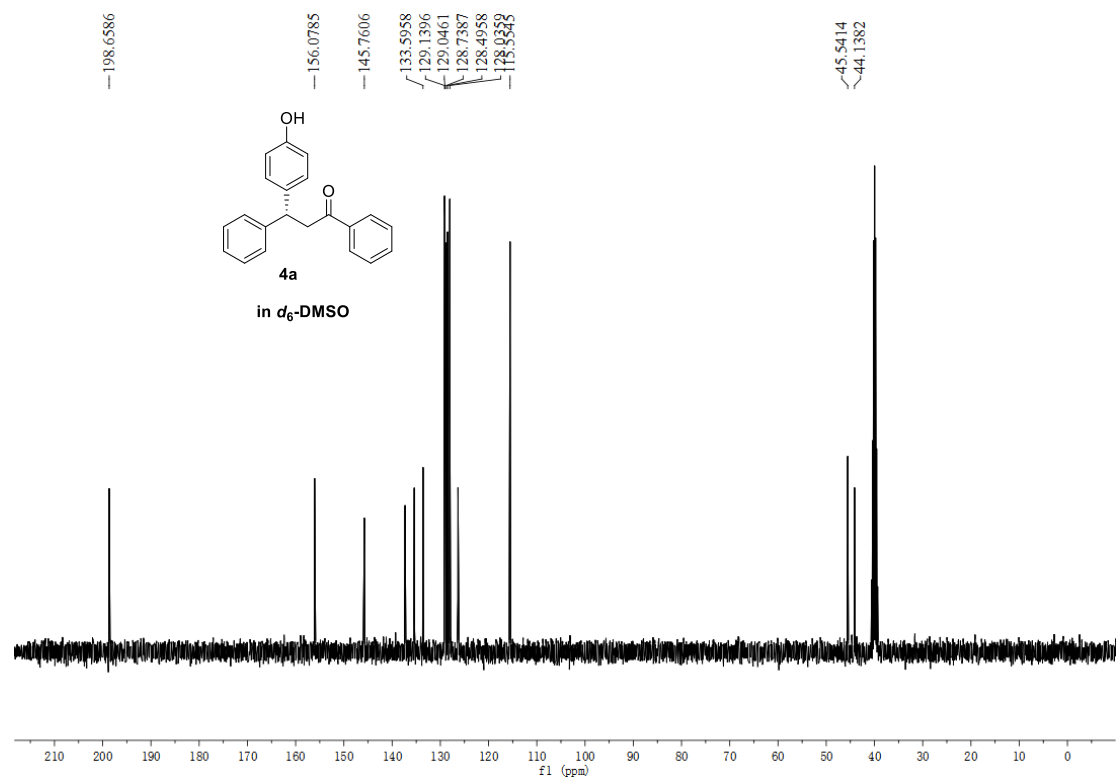

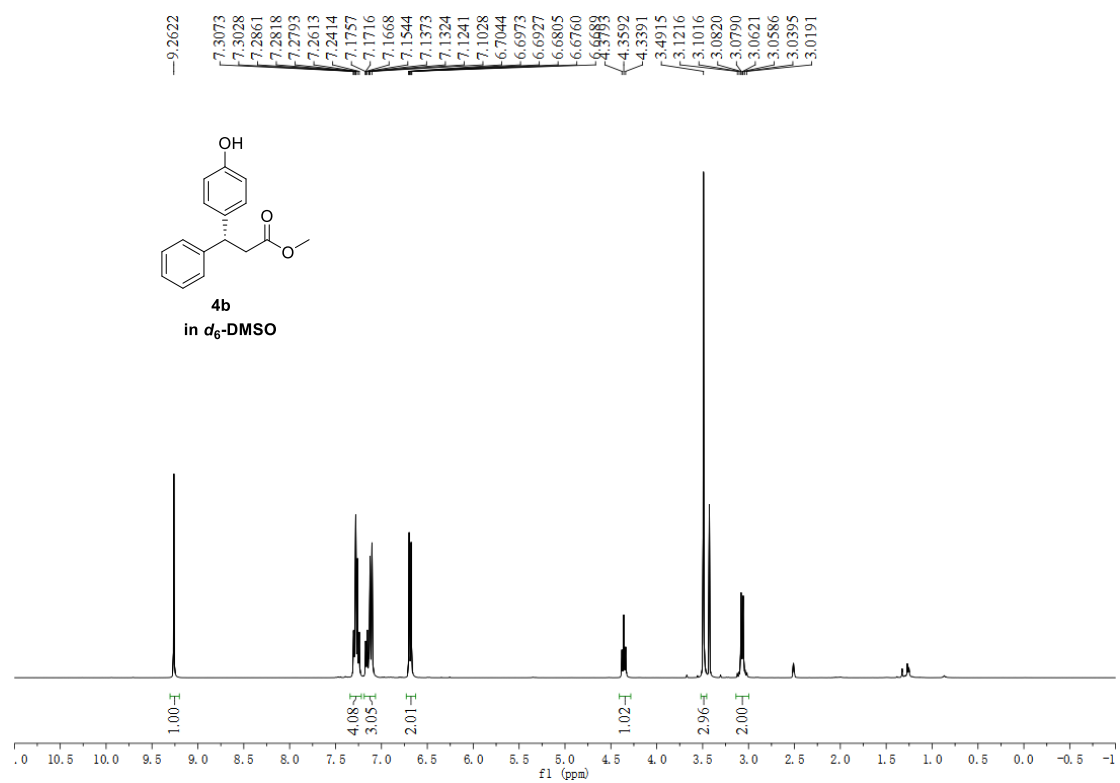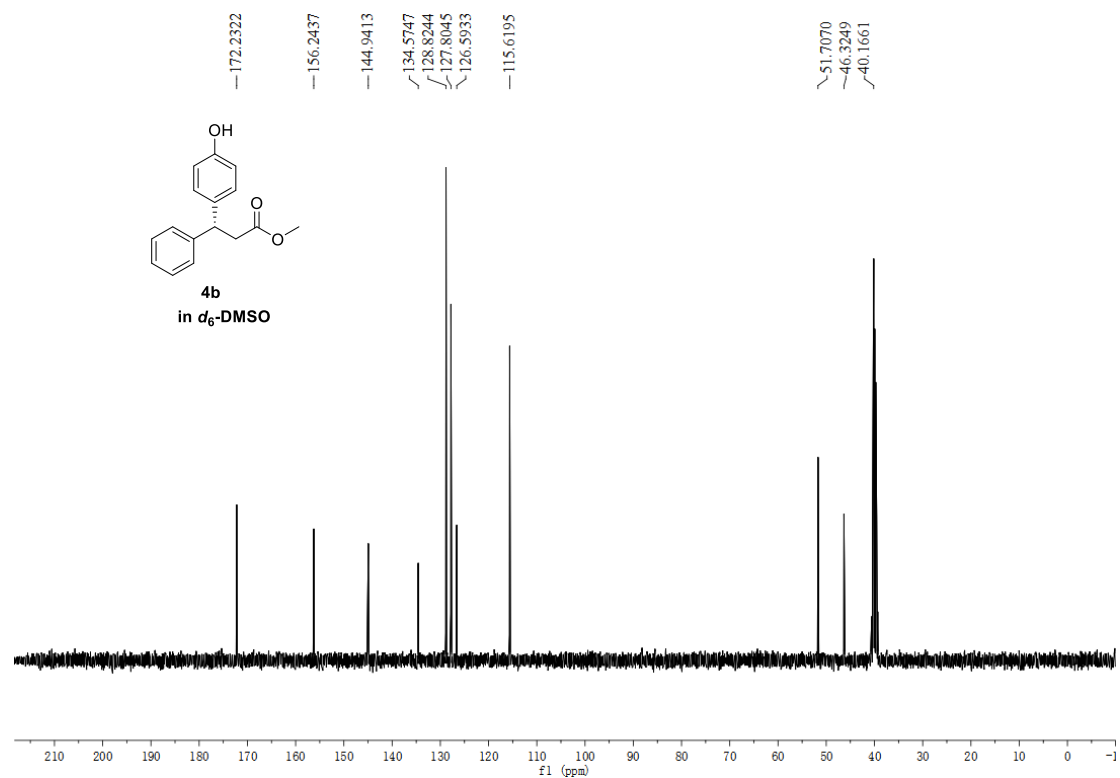

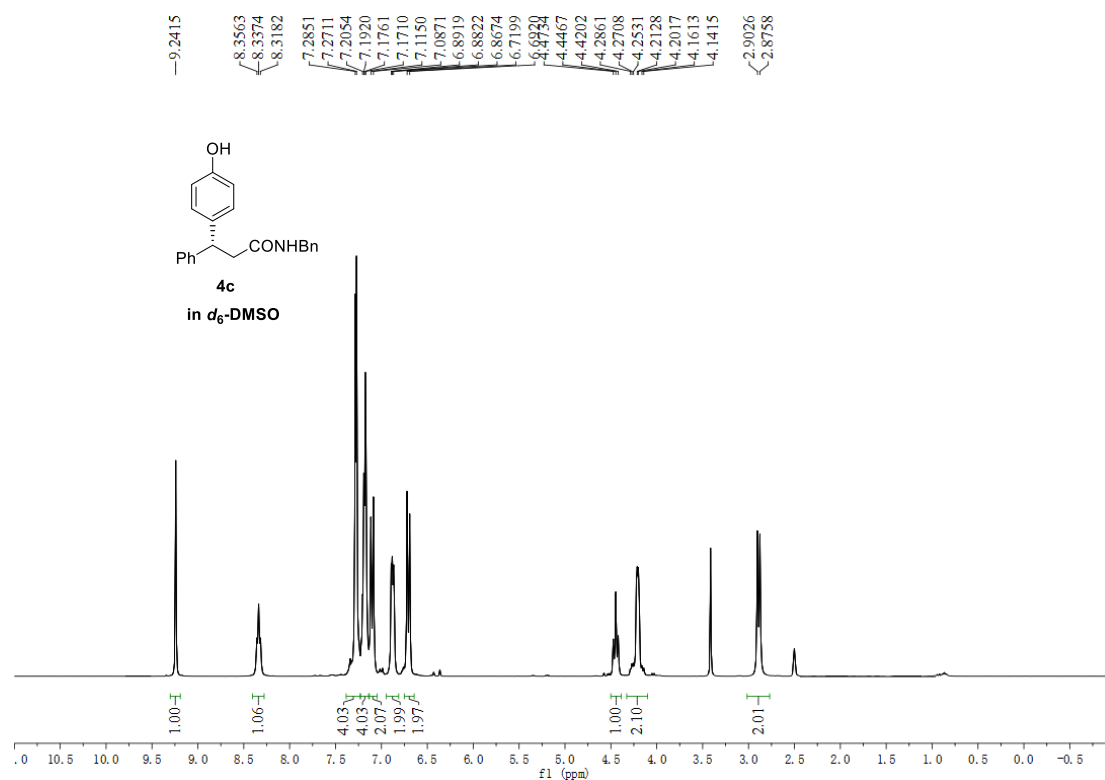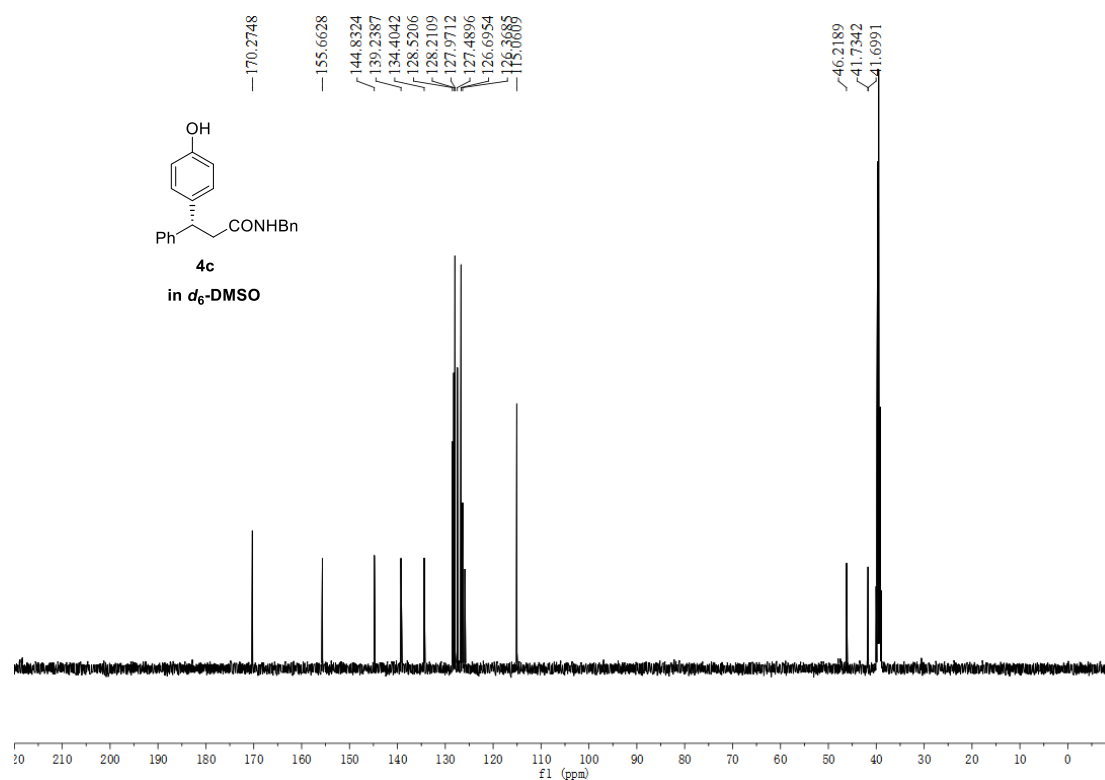

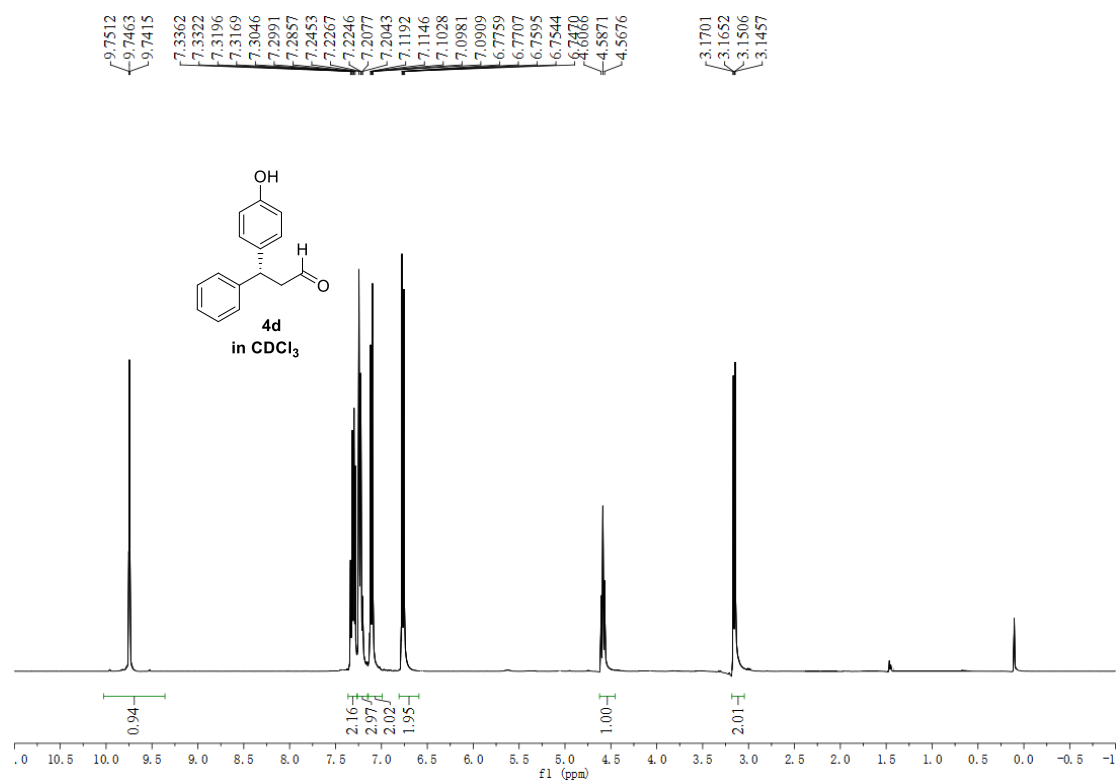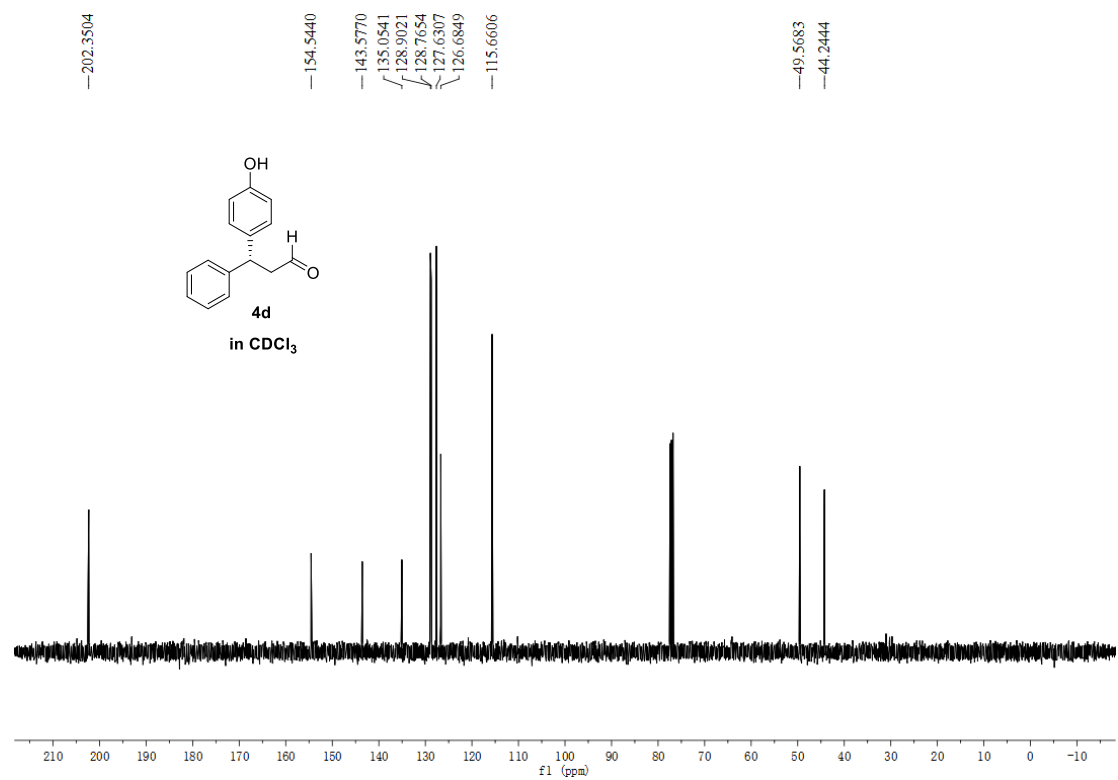

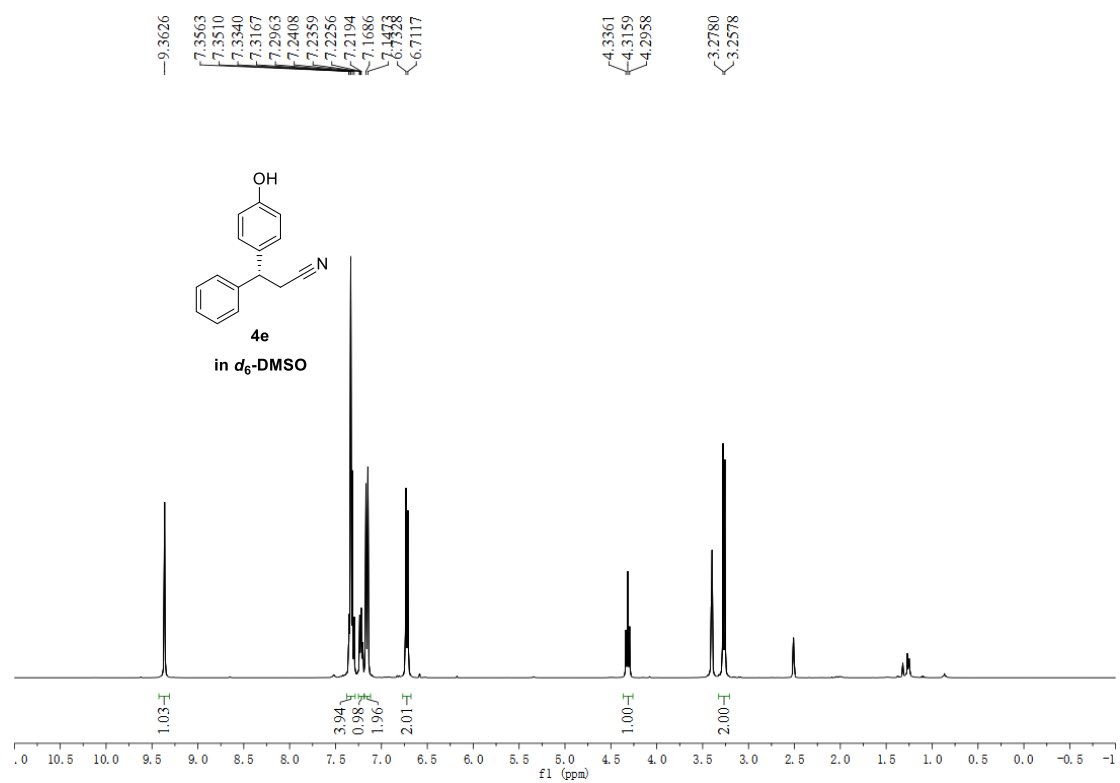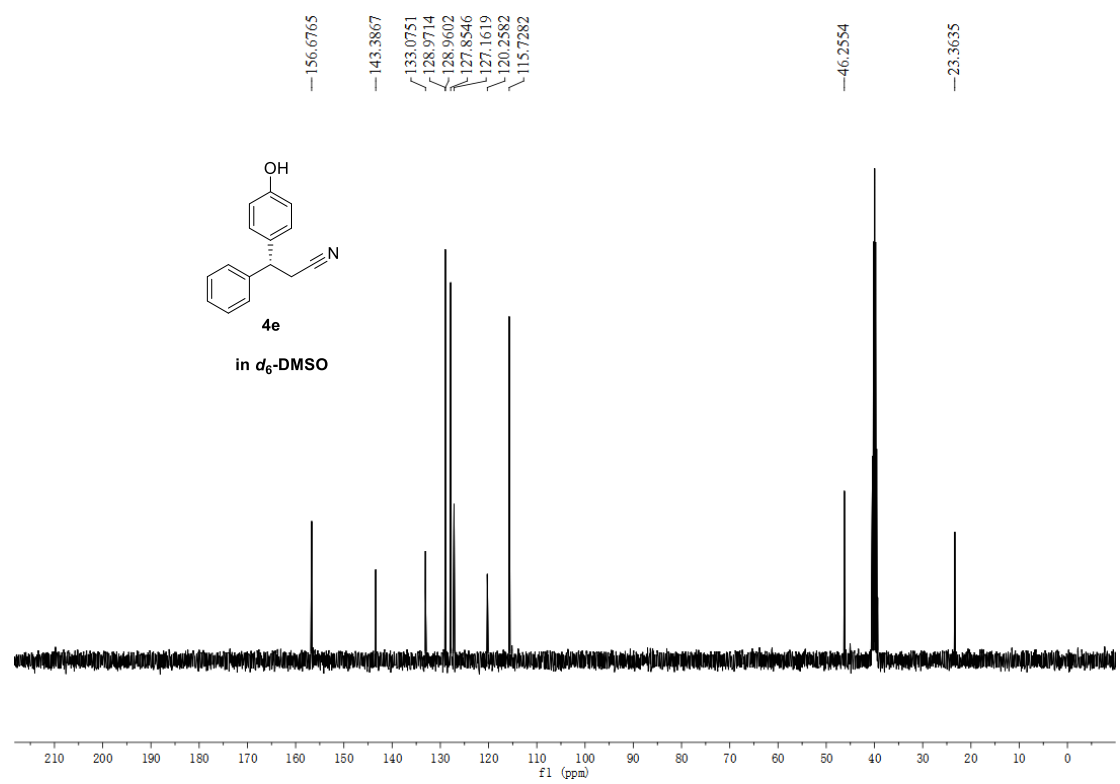

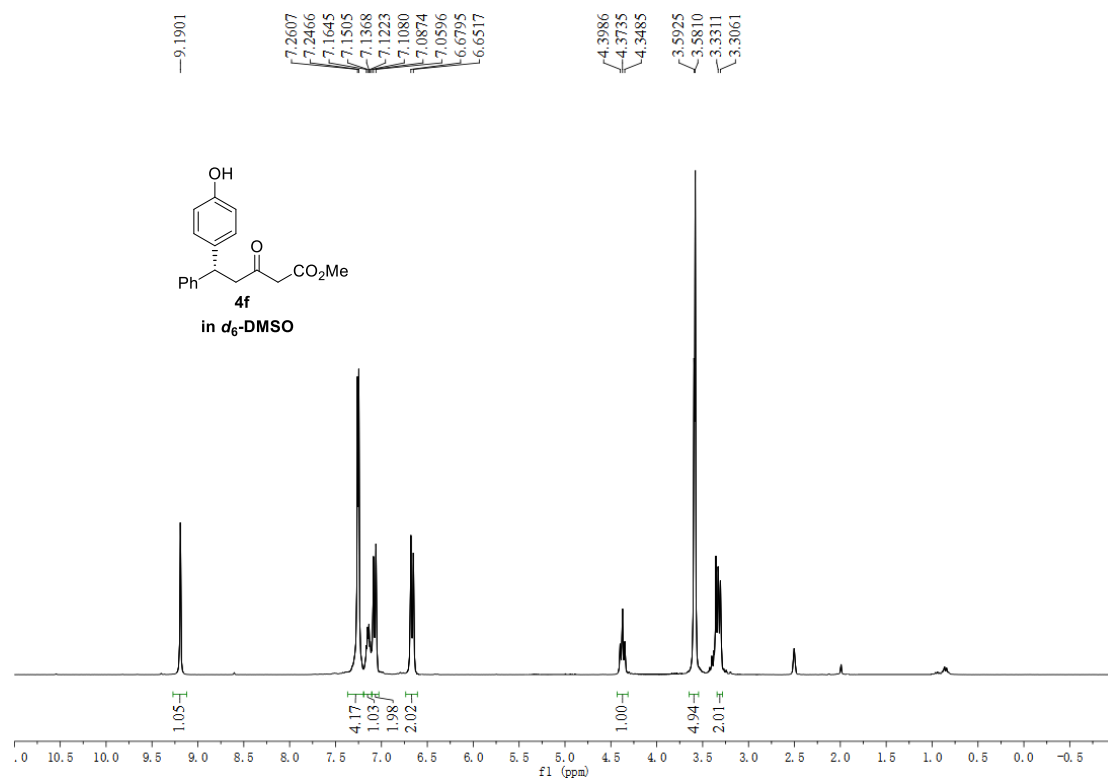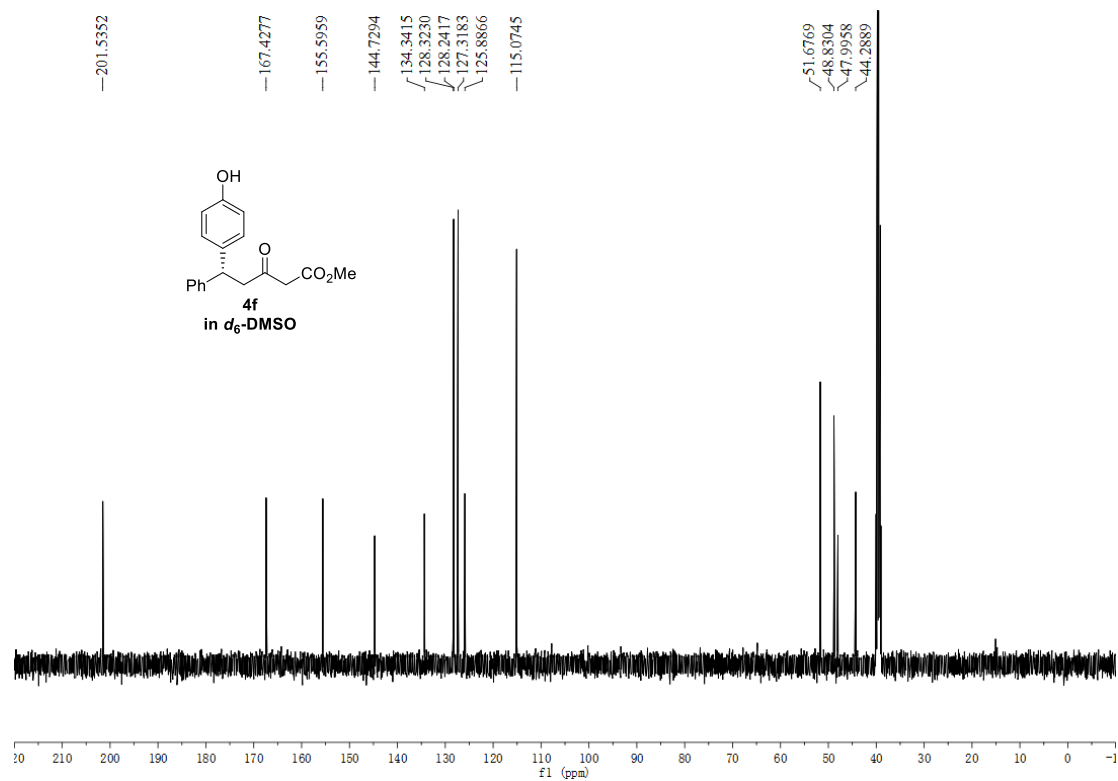

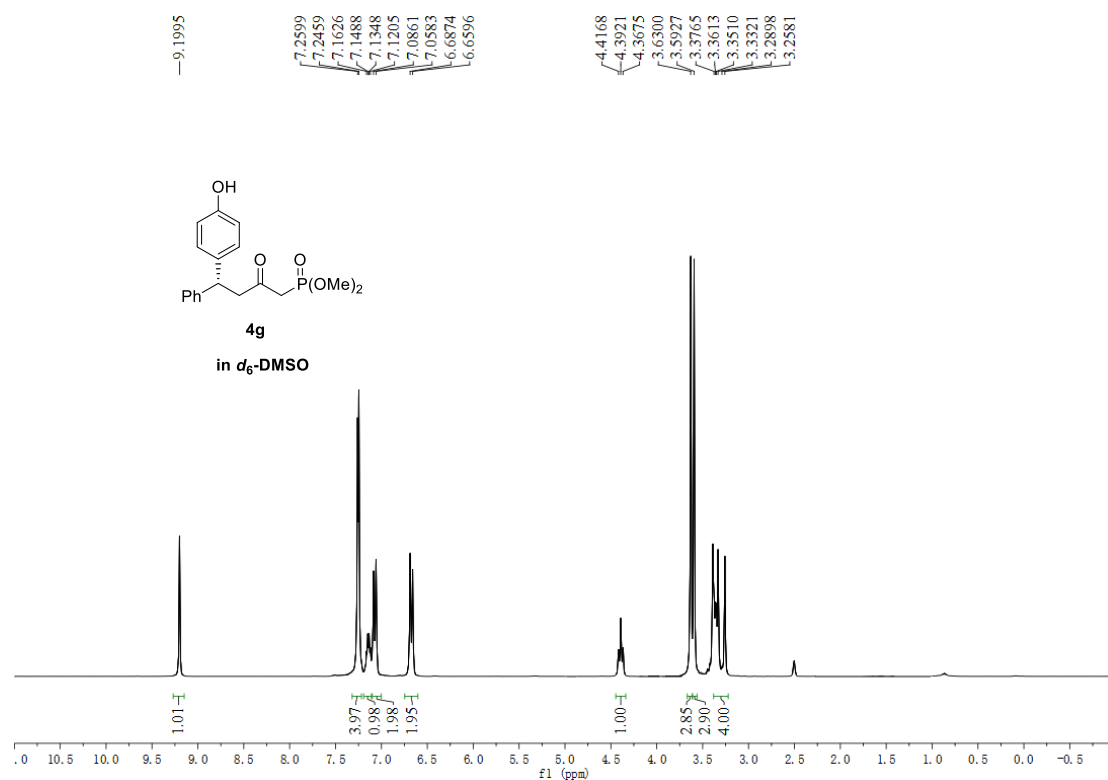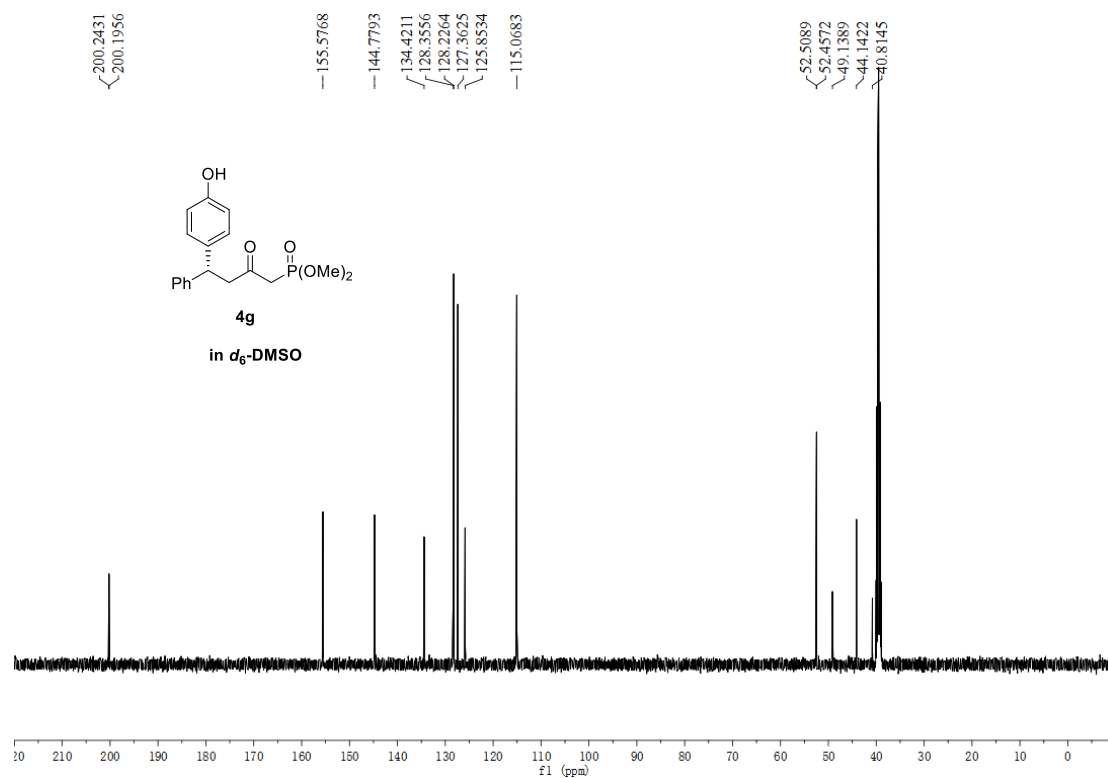

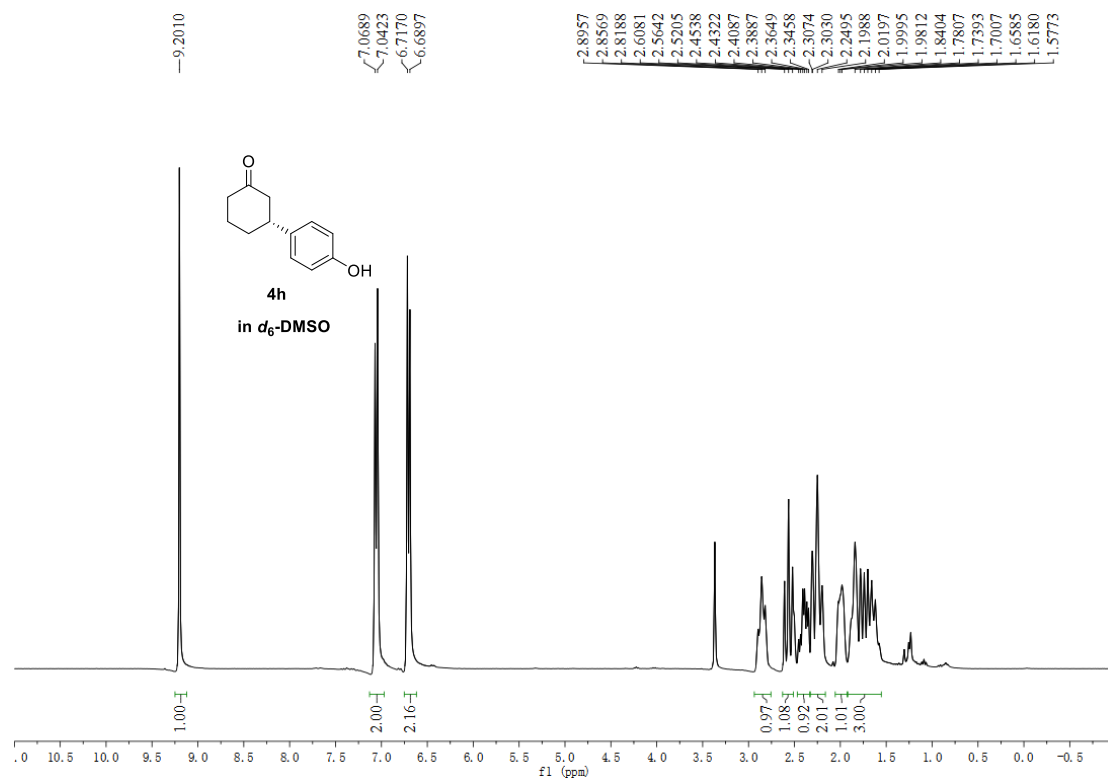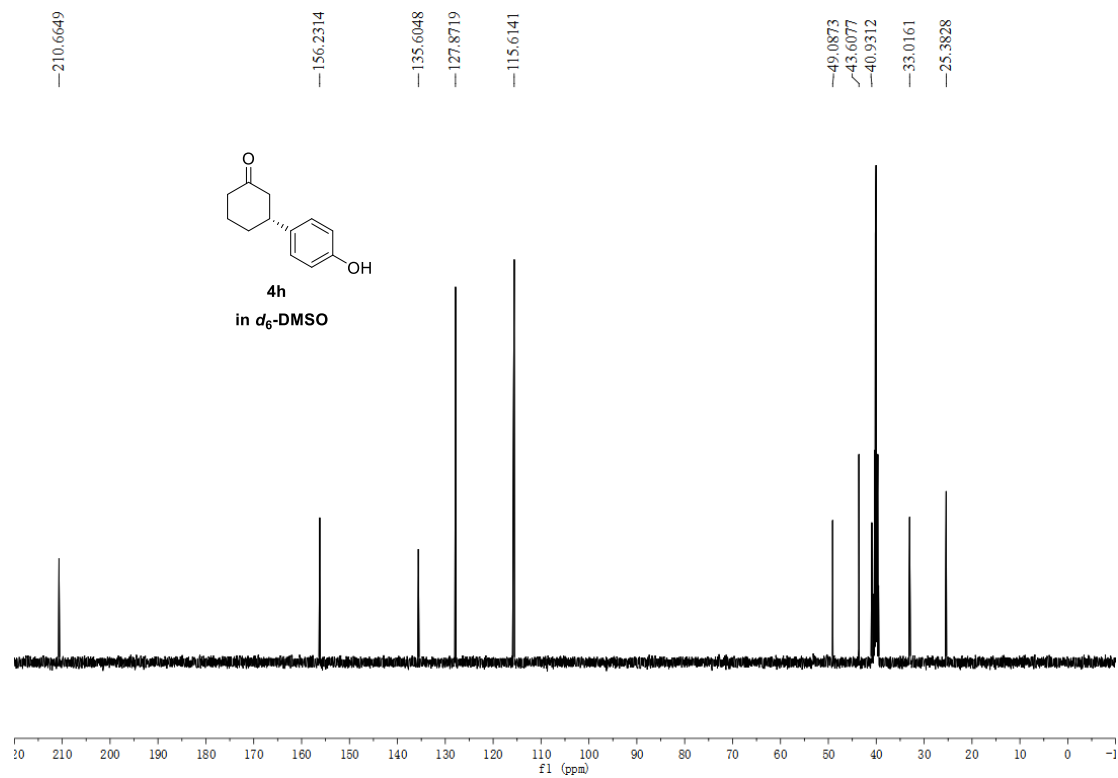

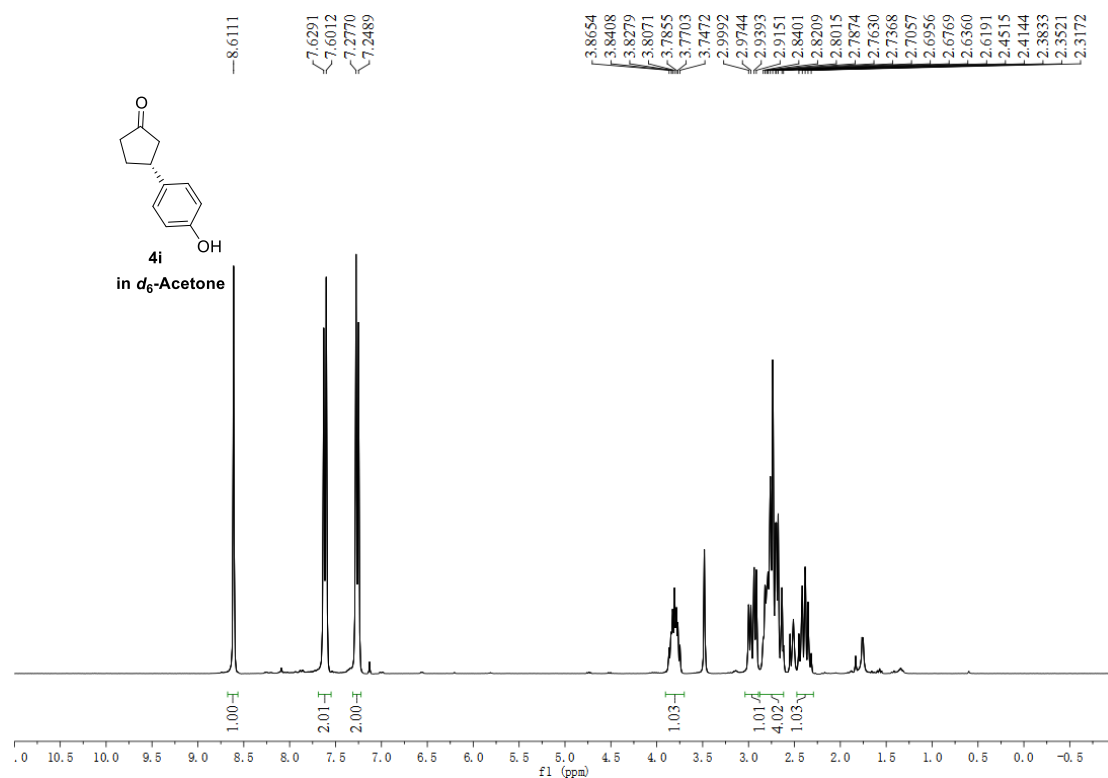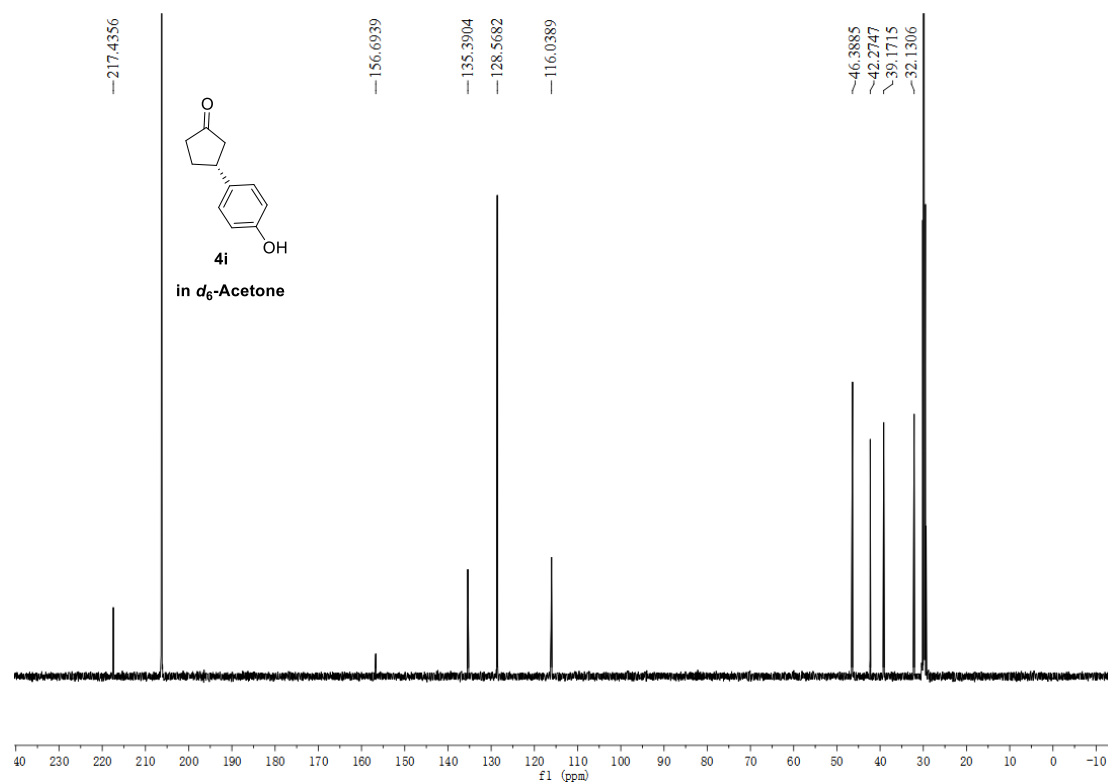

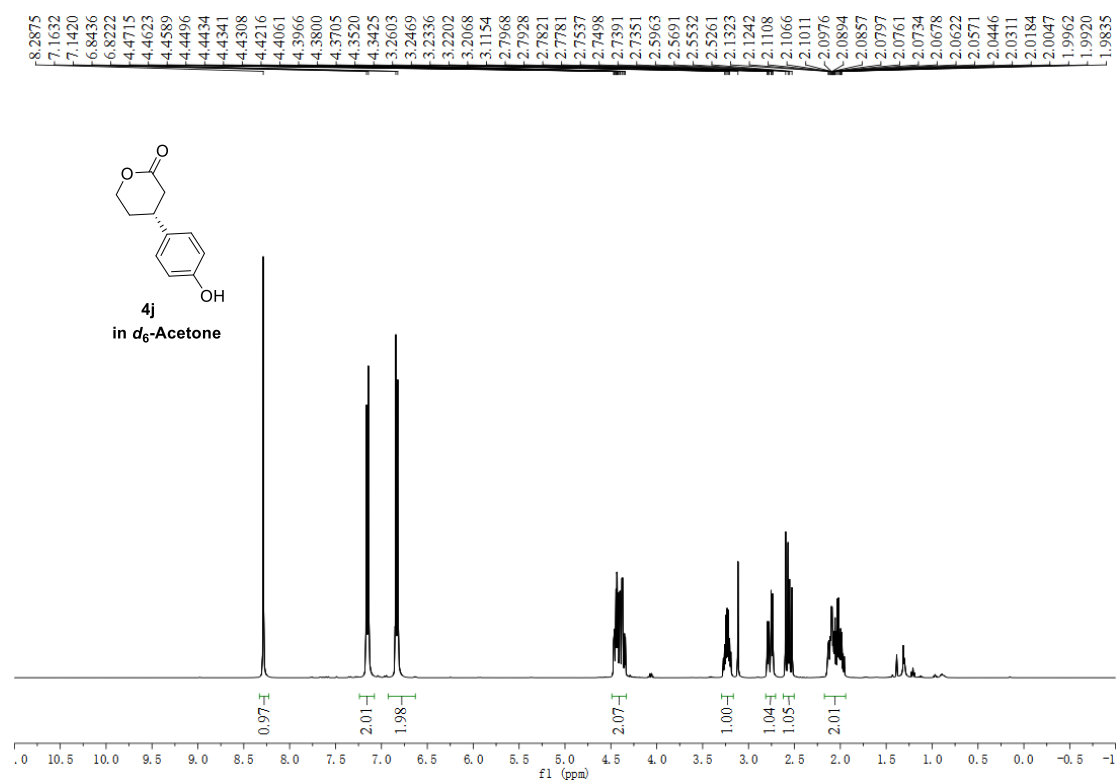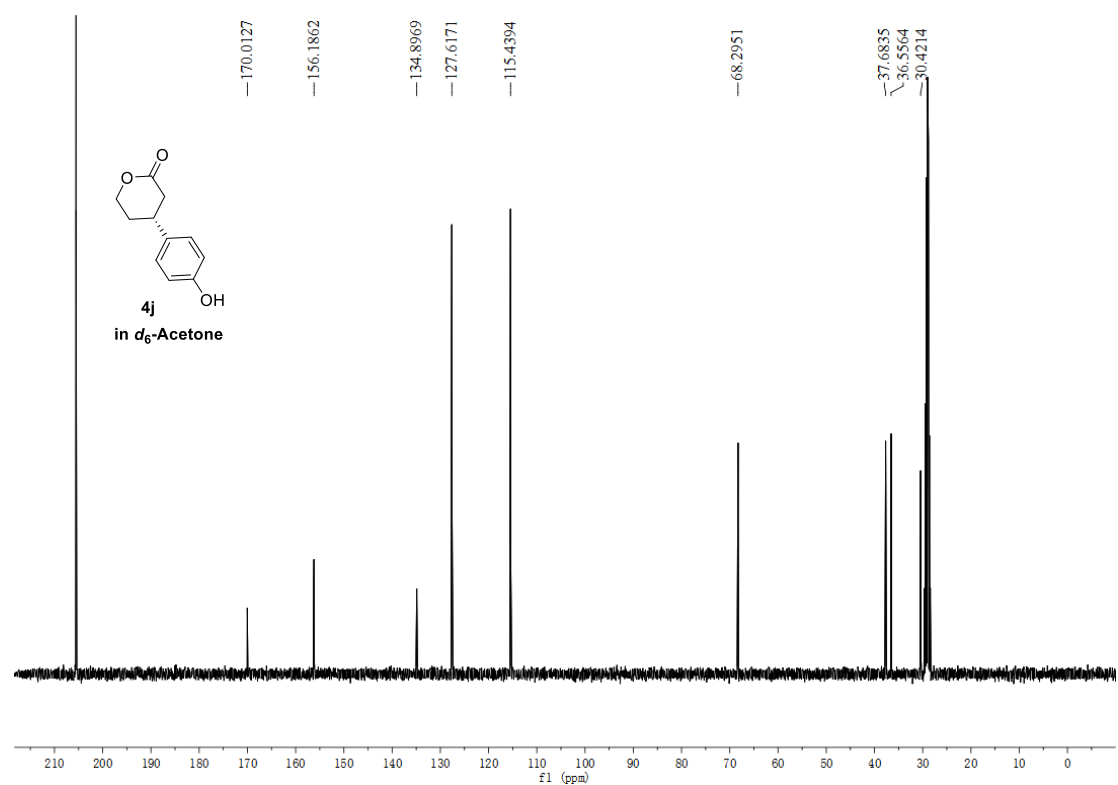

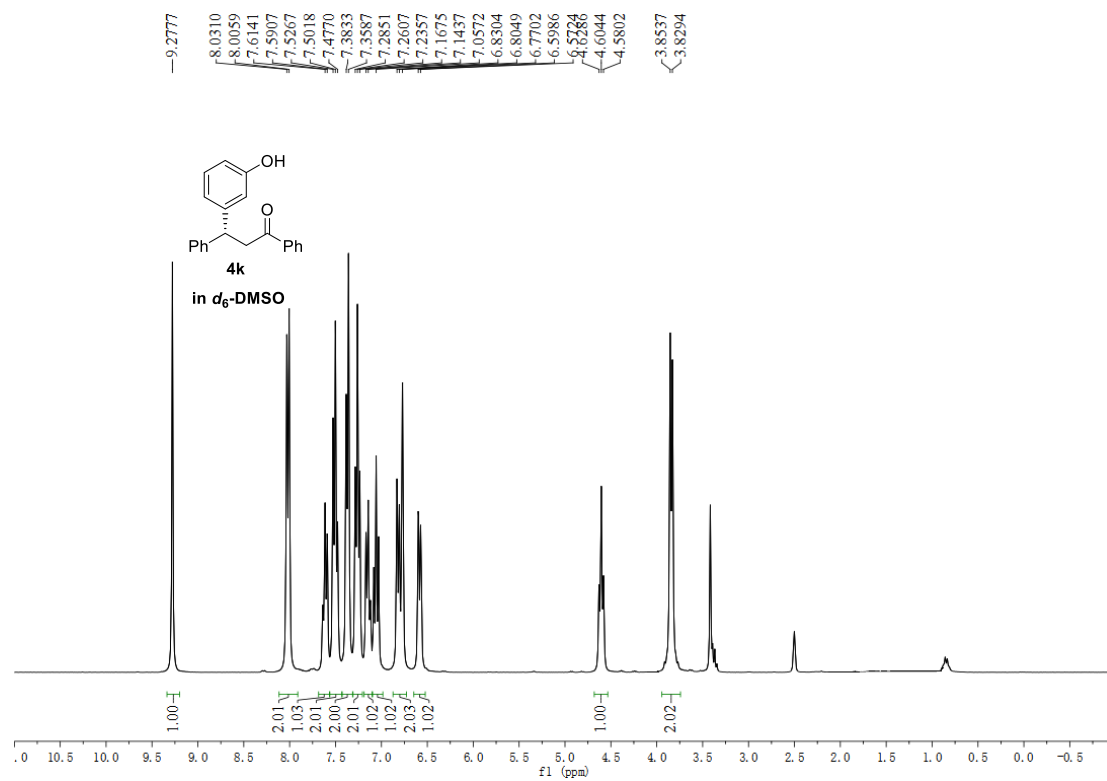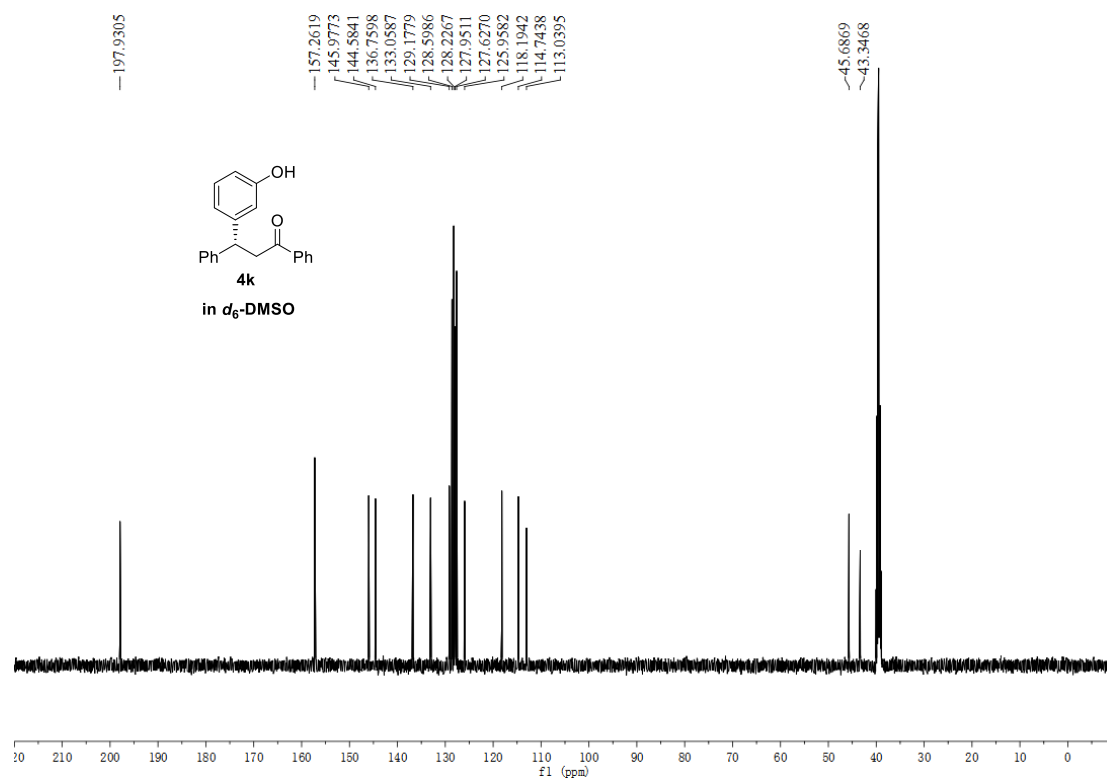

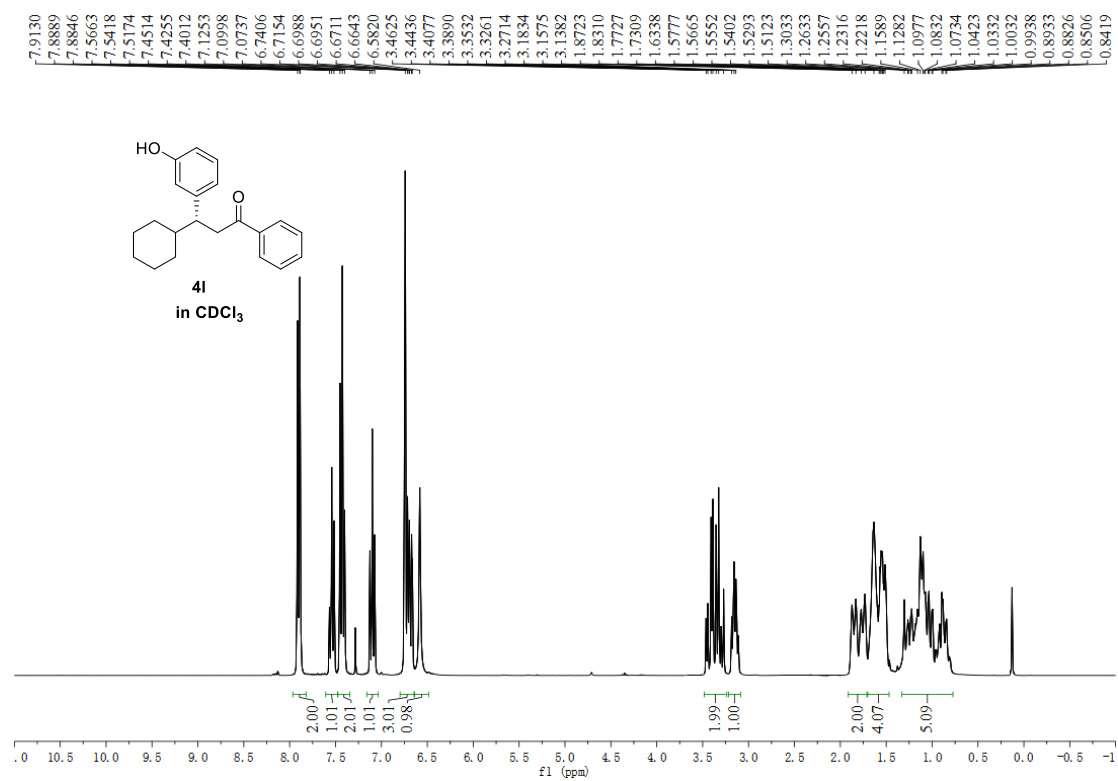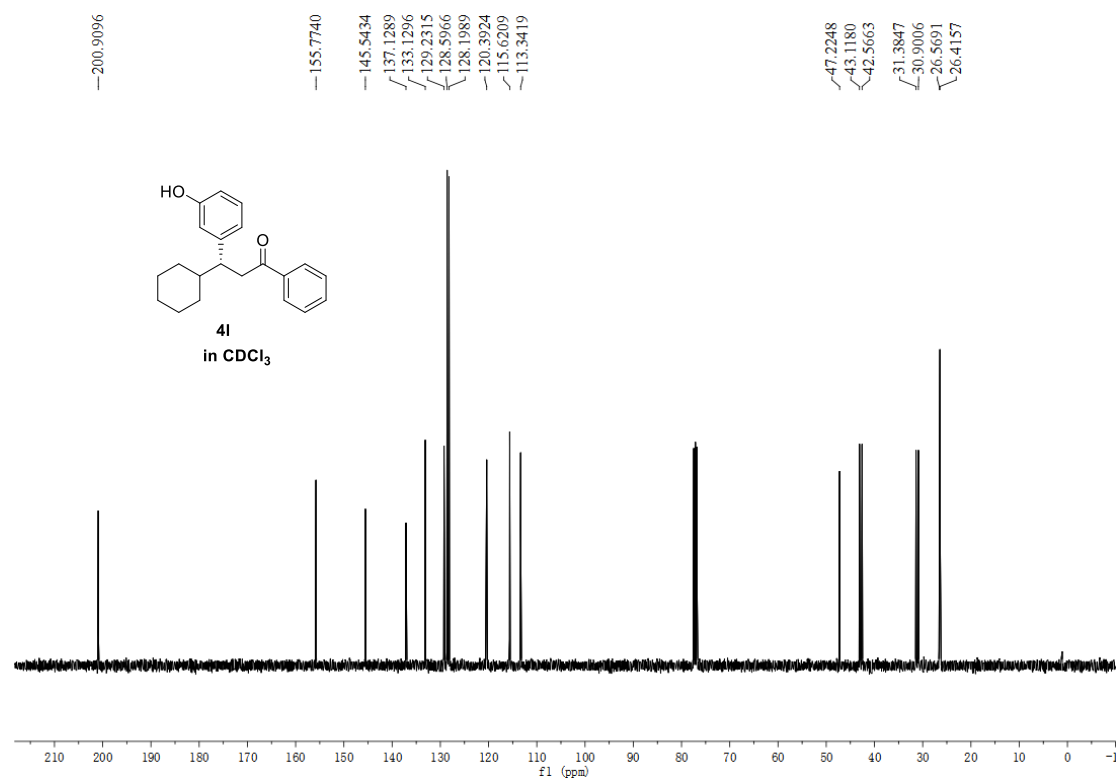

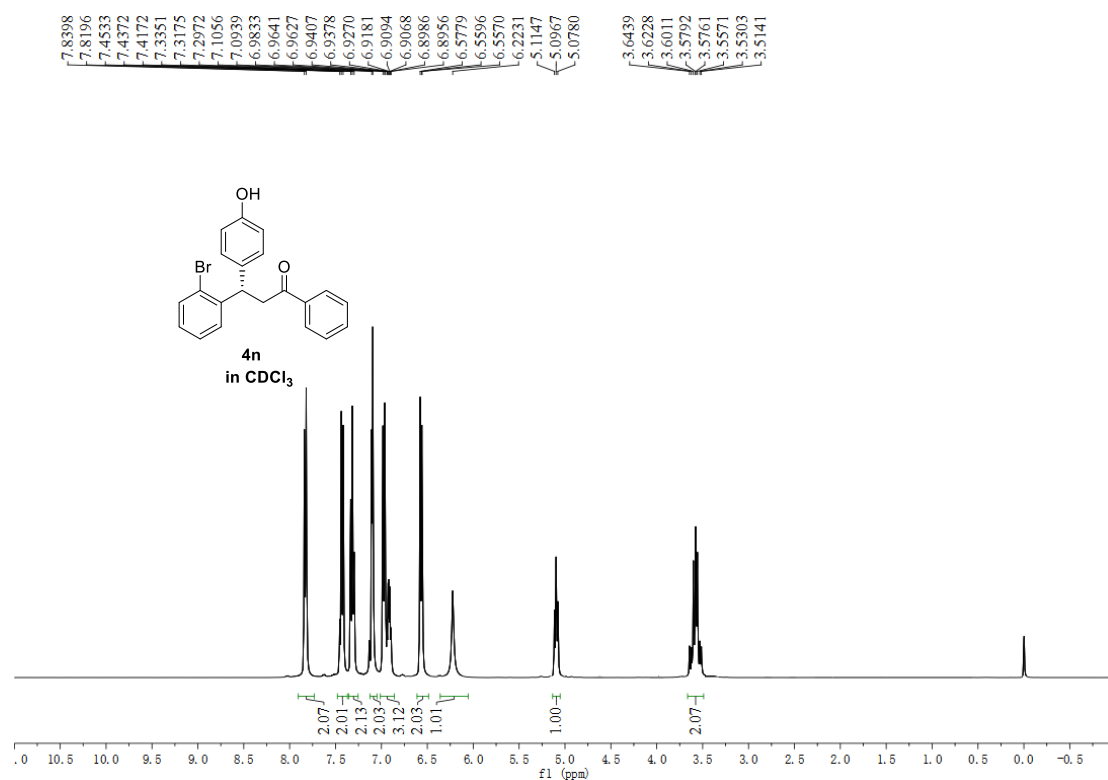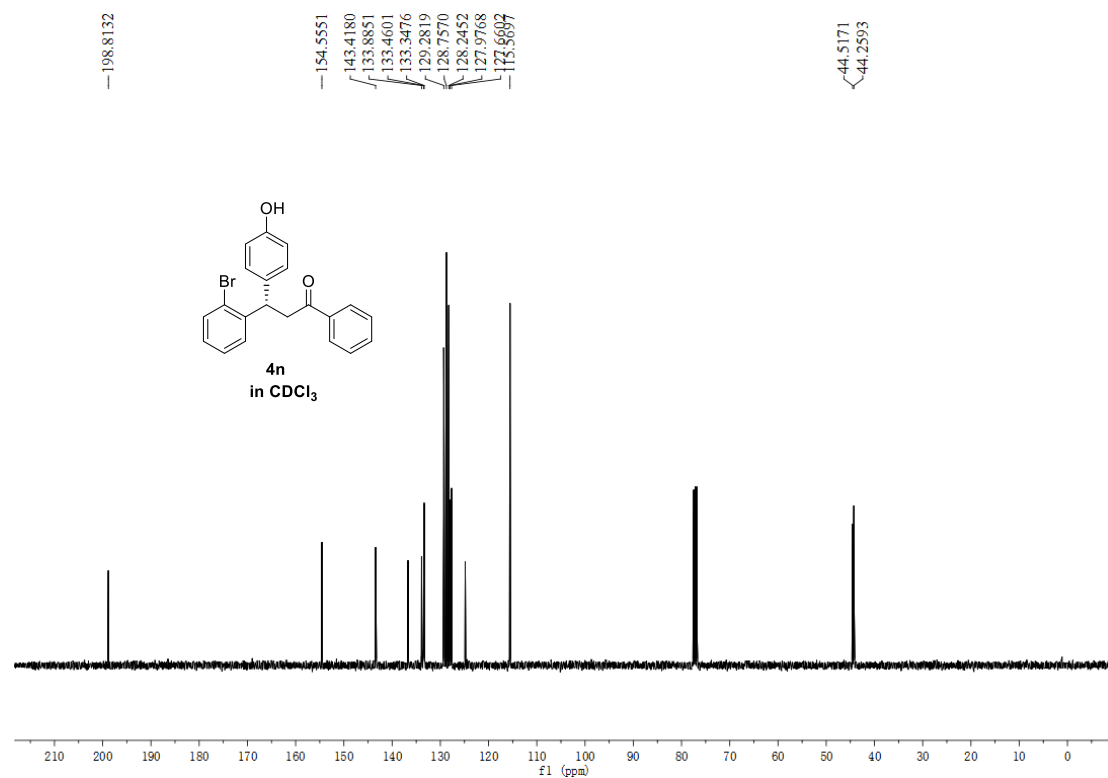

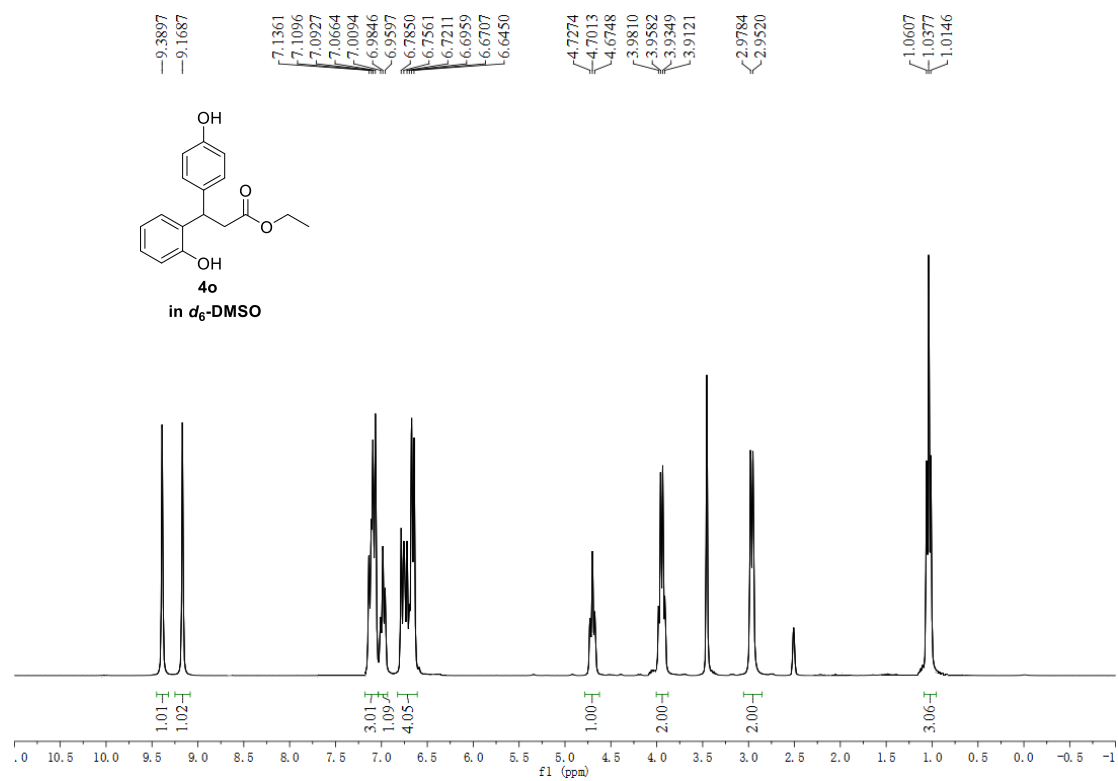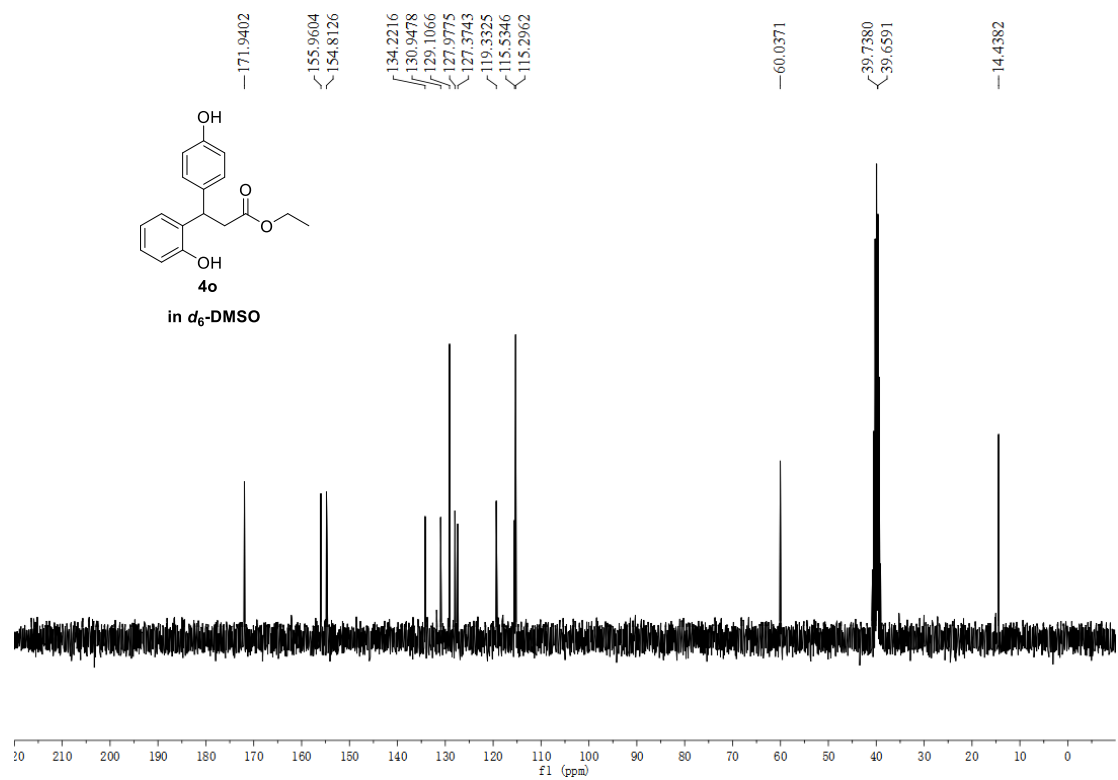

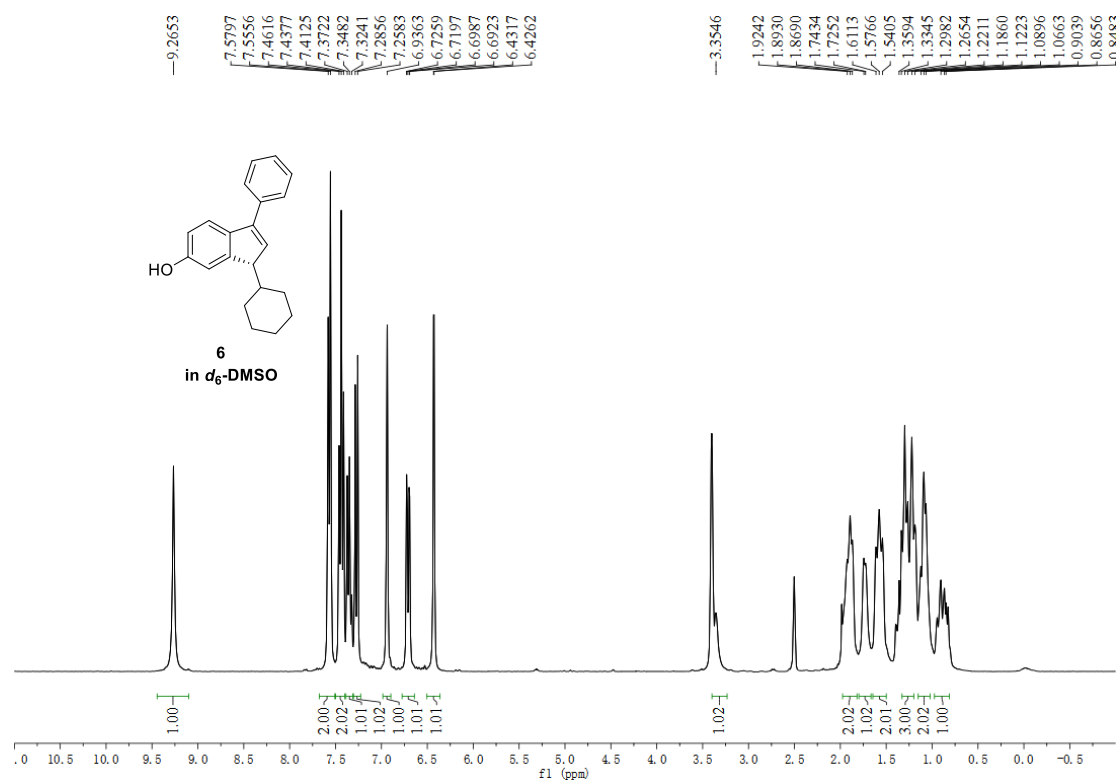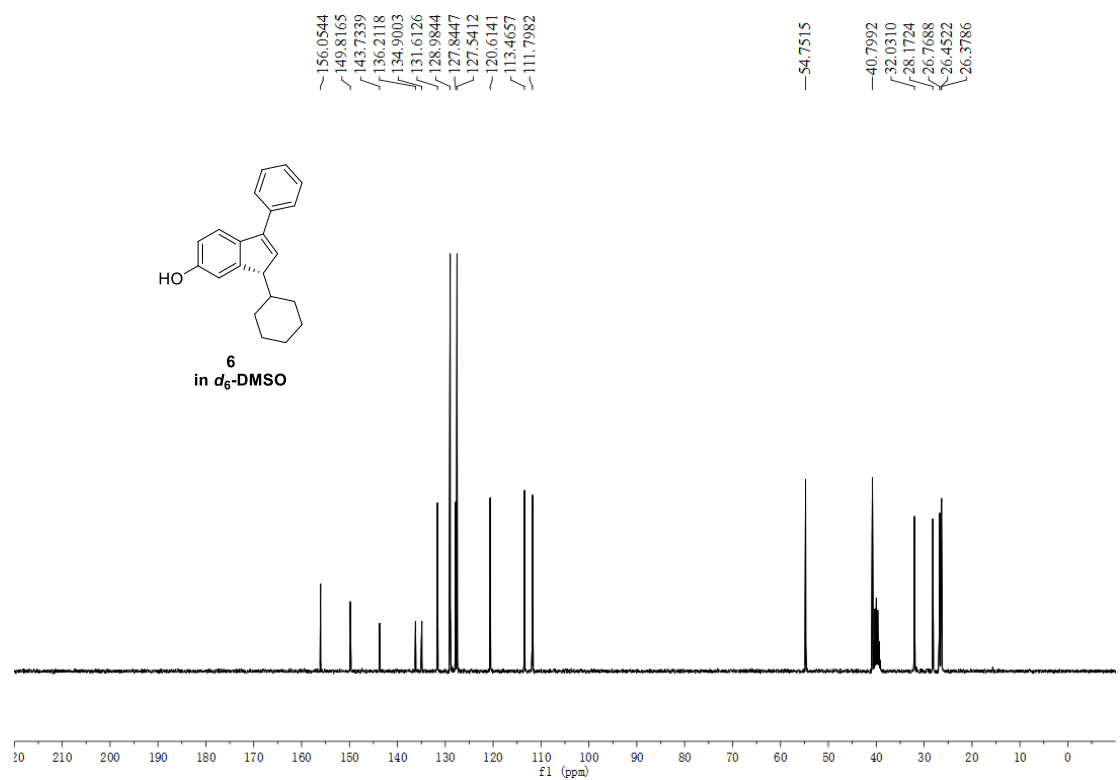

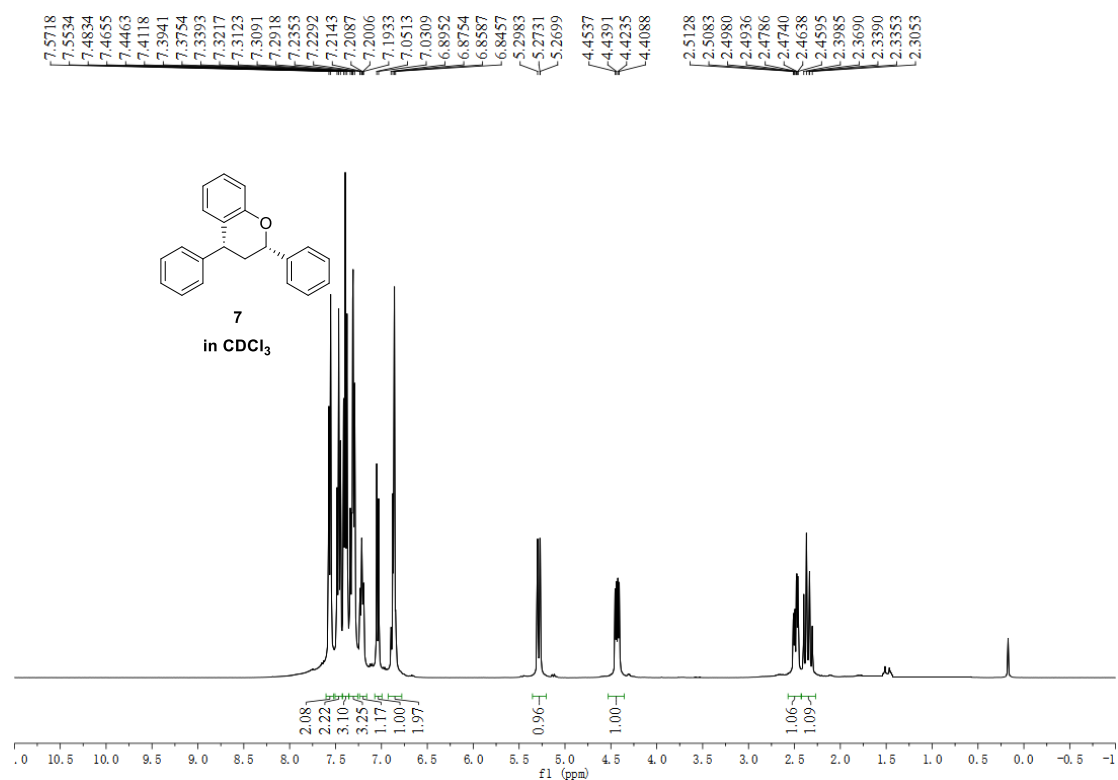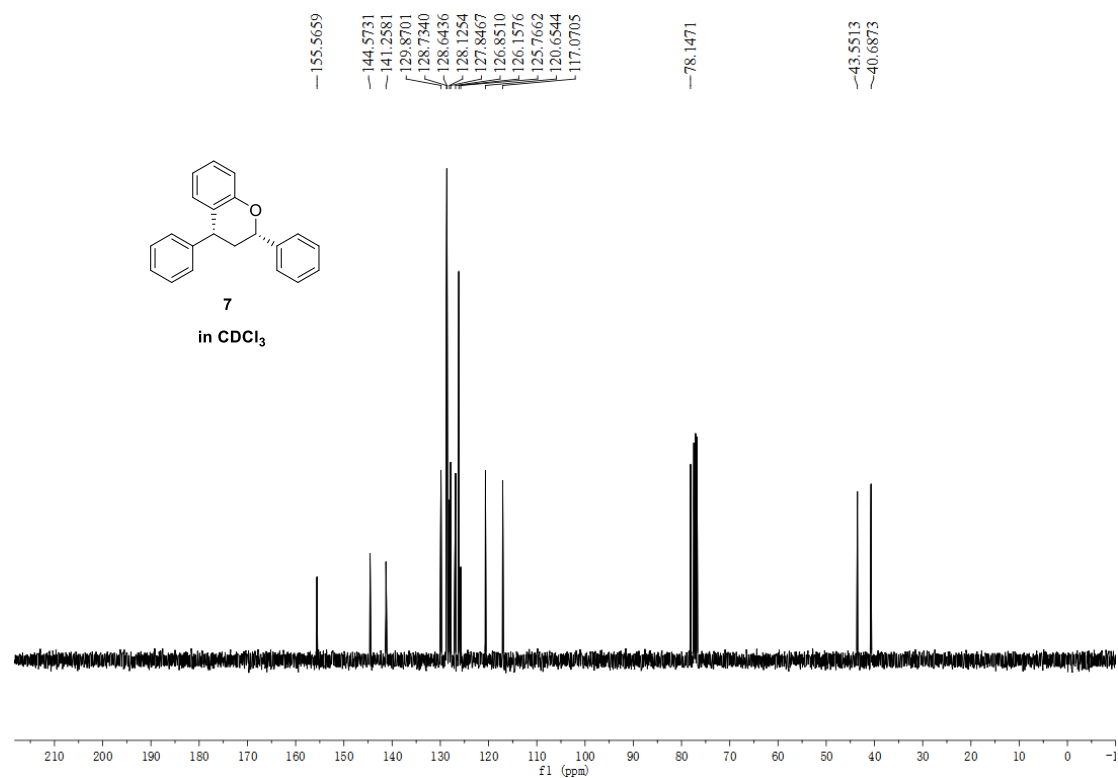

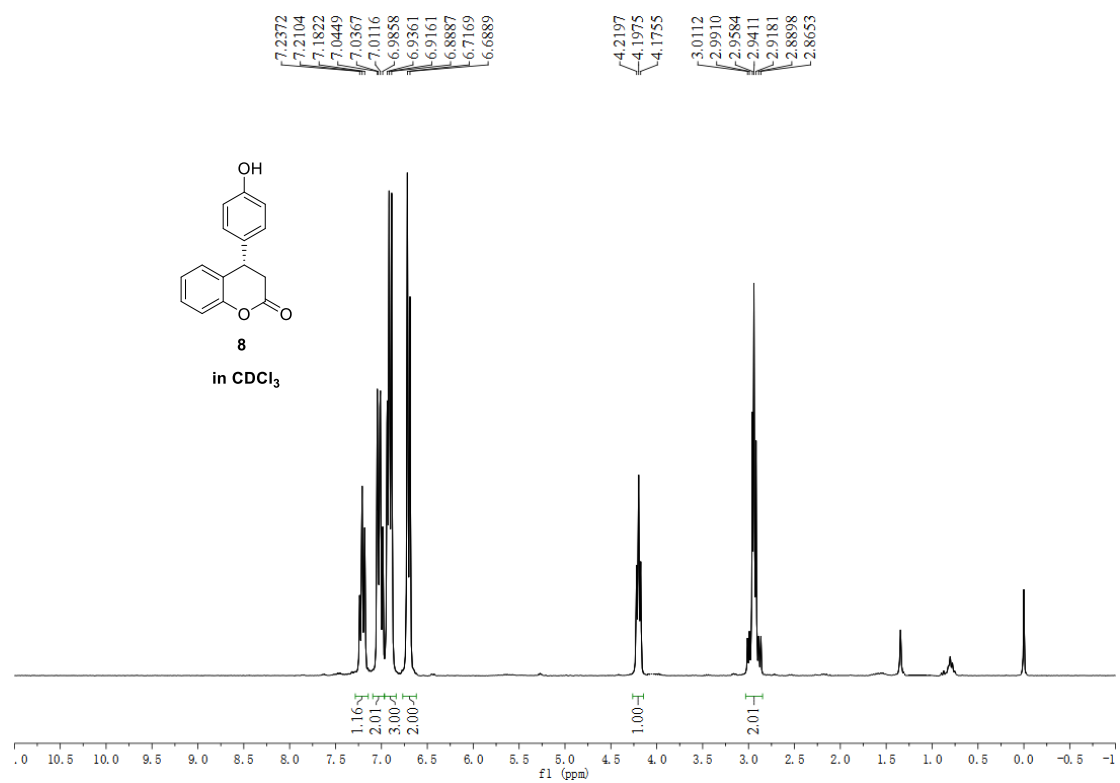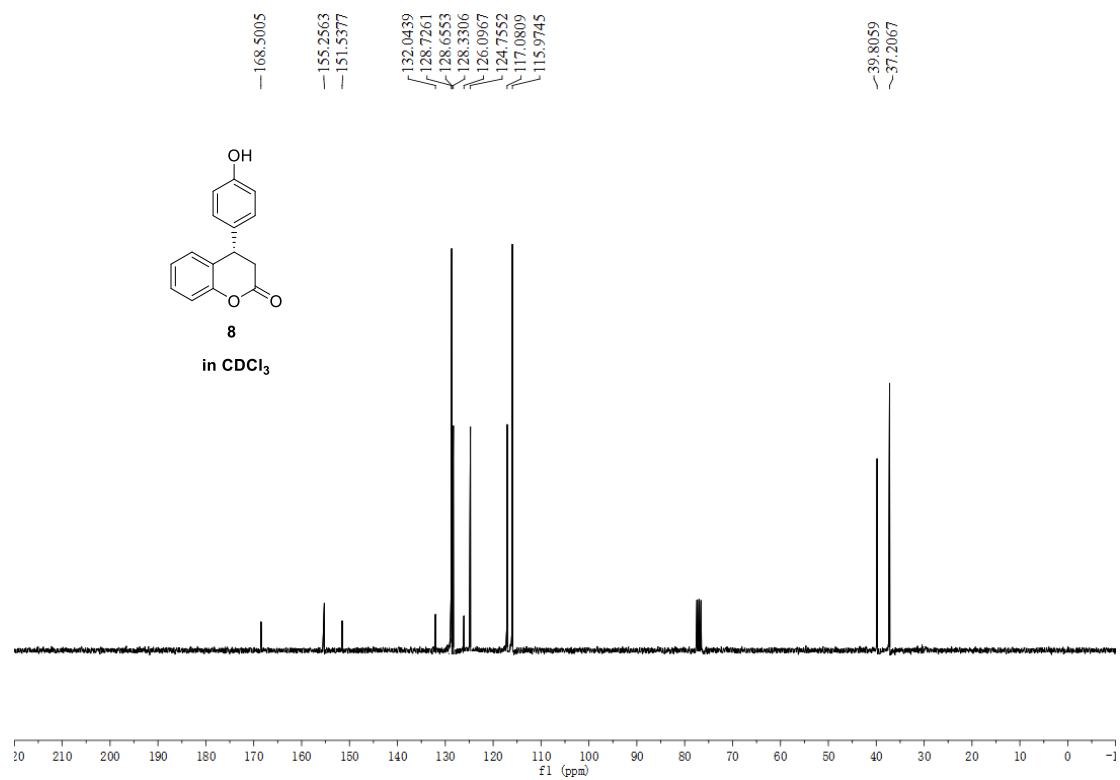

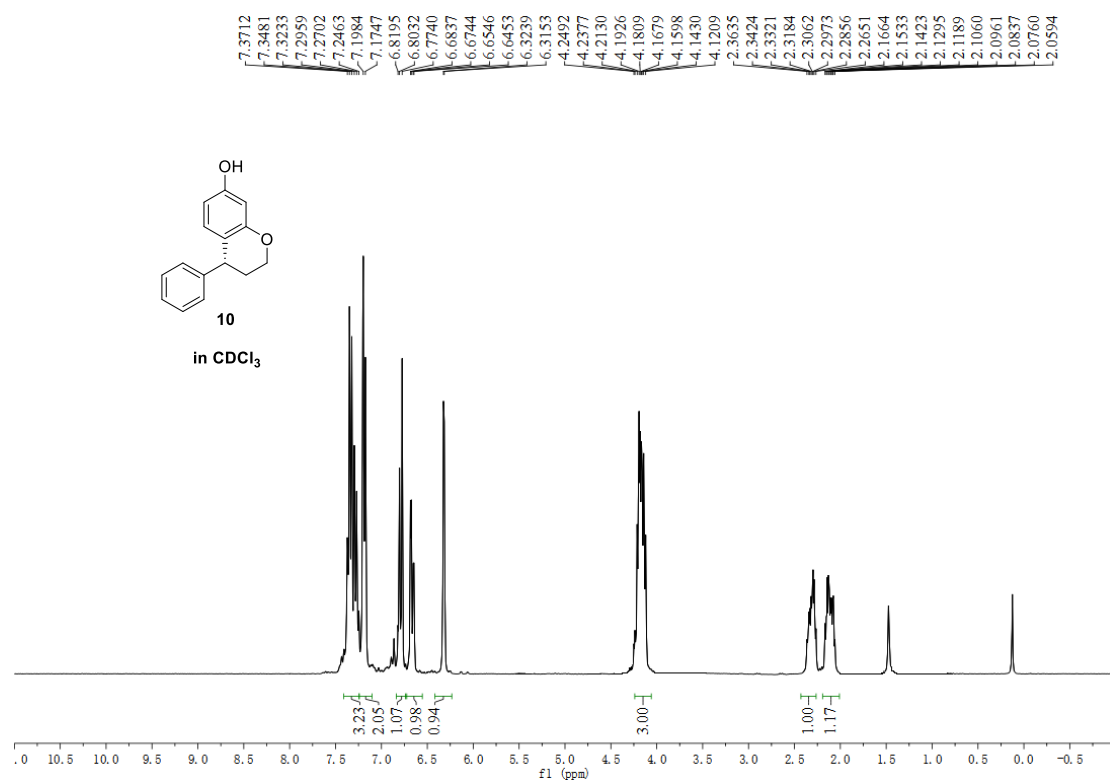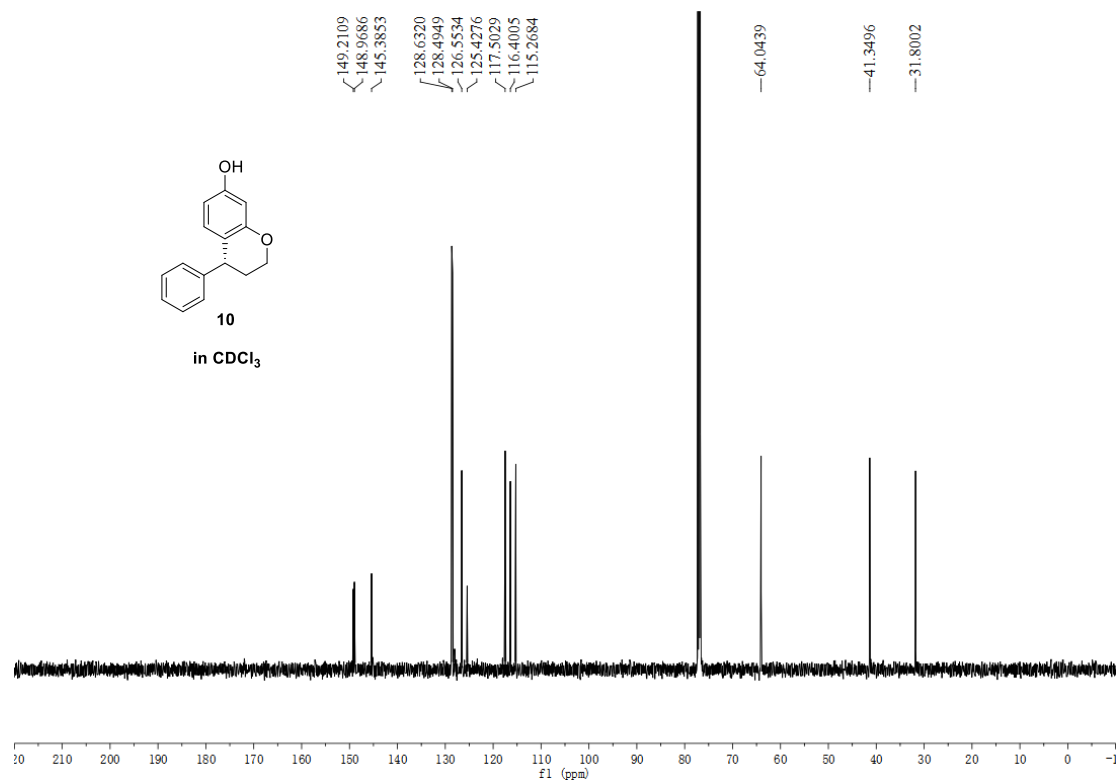

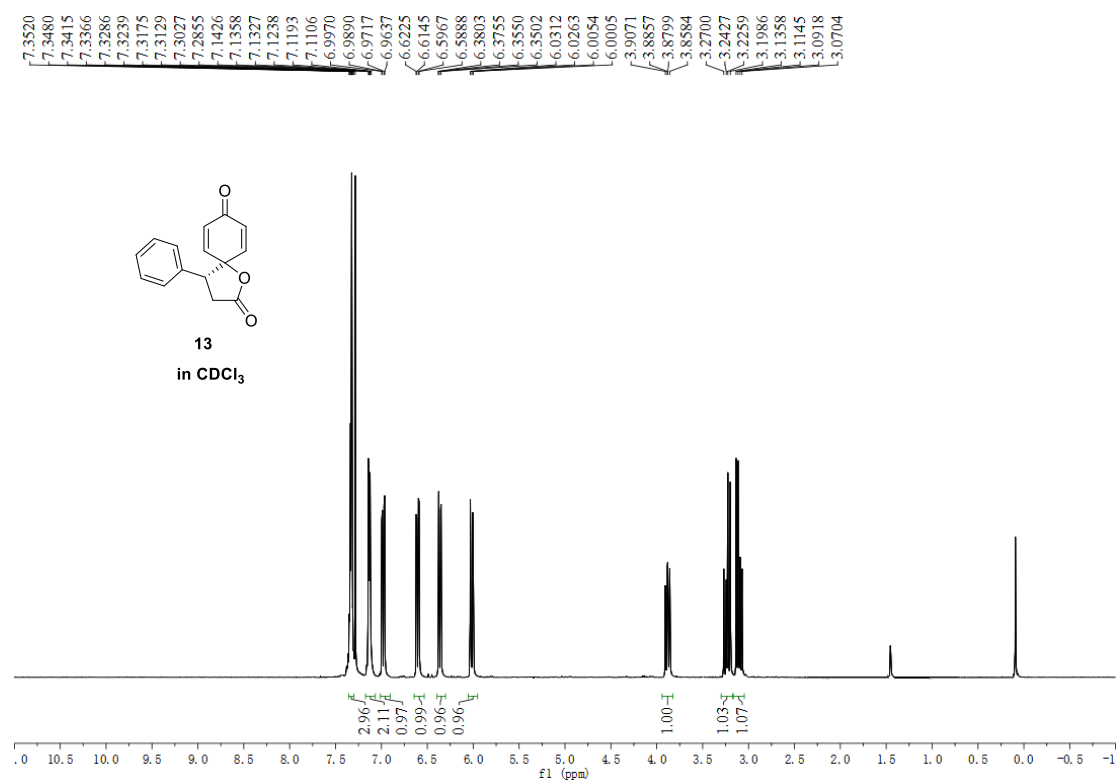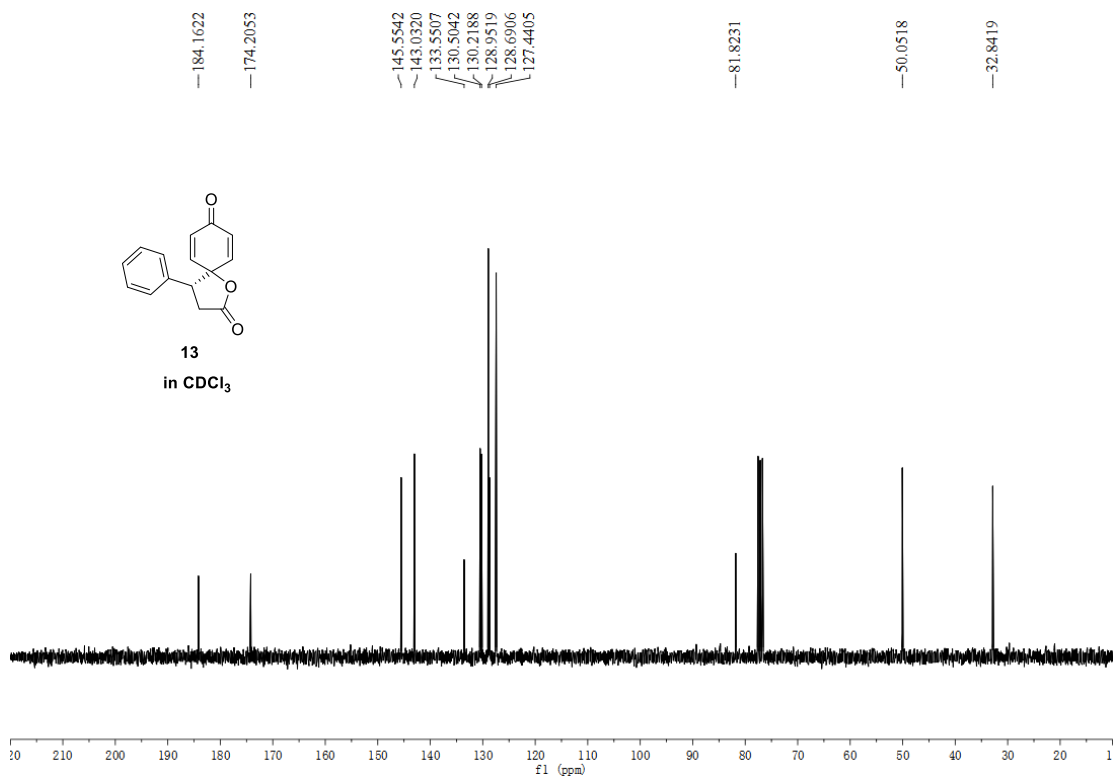

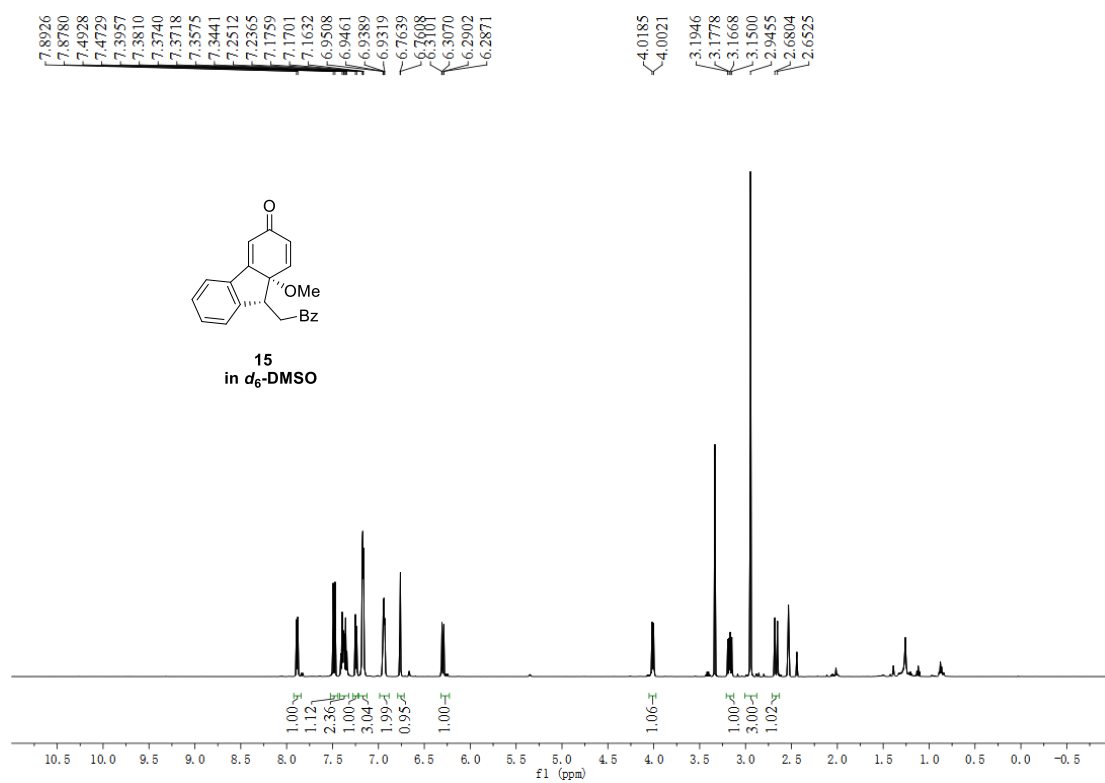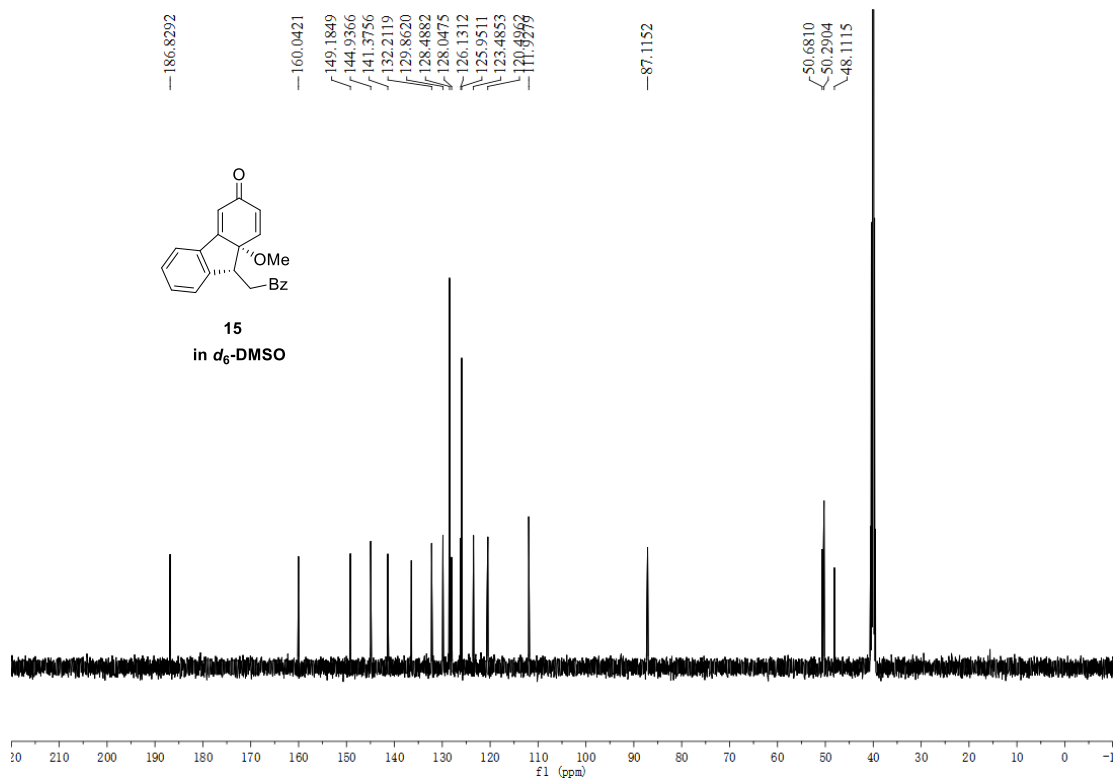

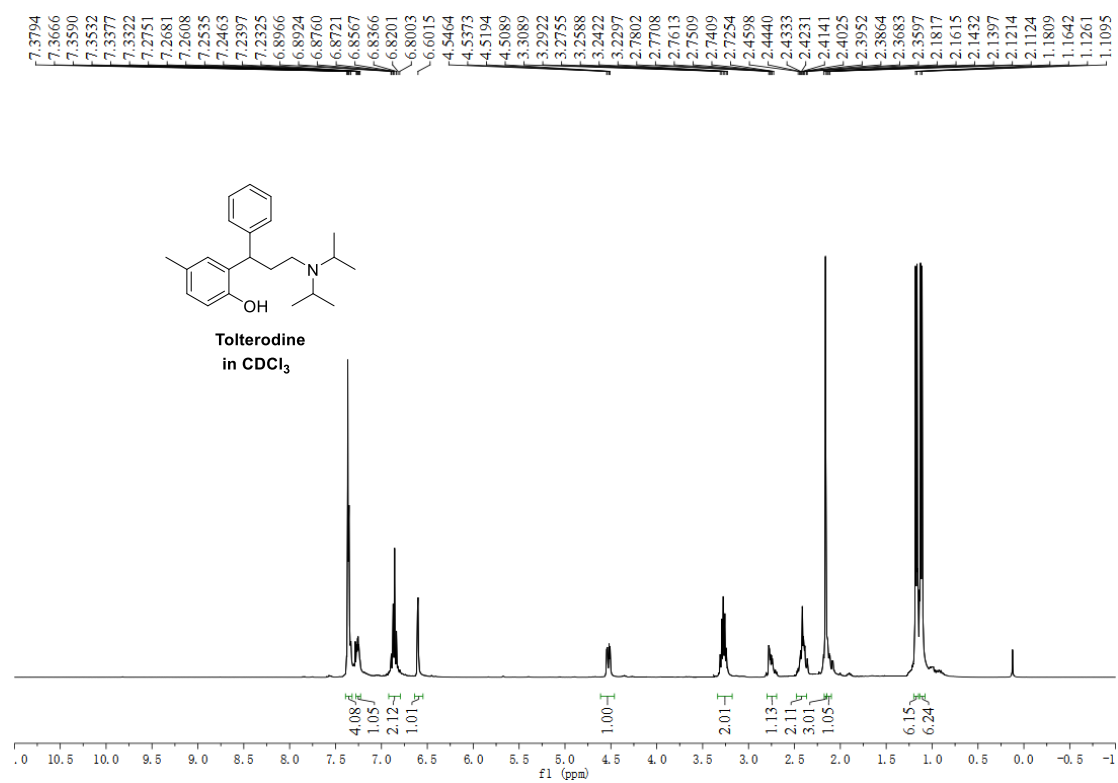

# 15 NOESY DMSO 303K AV-300

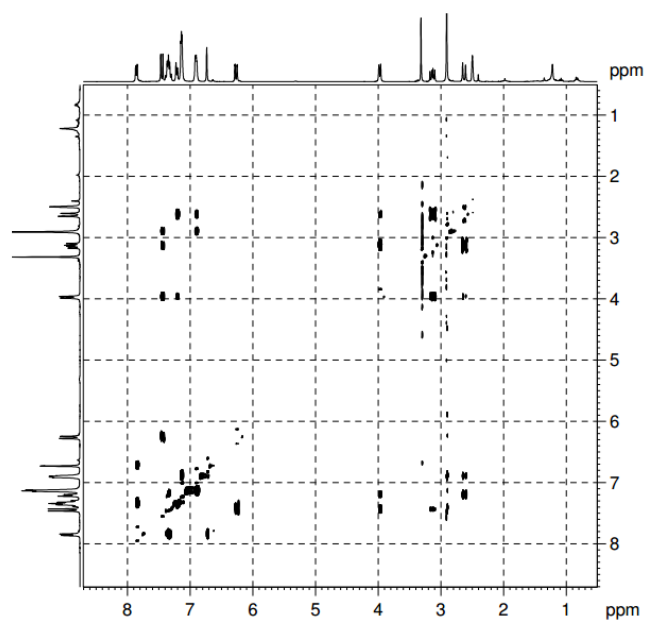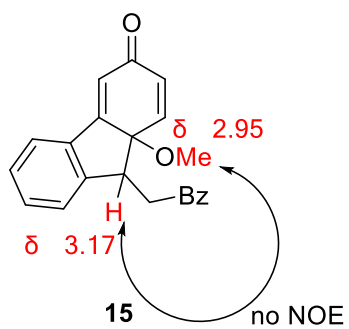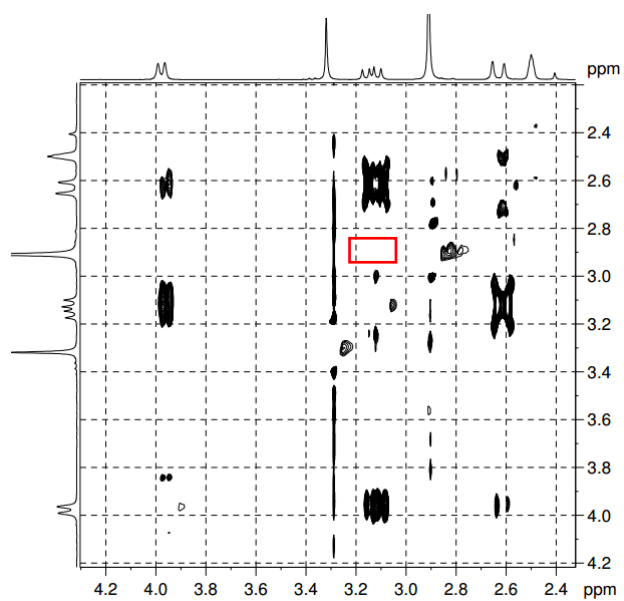

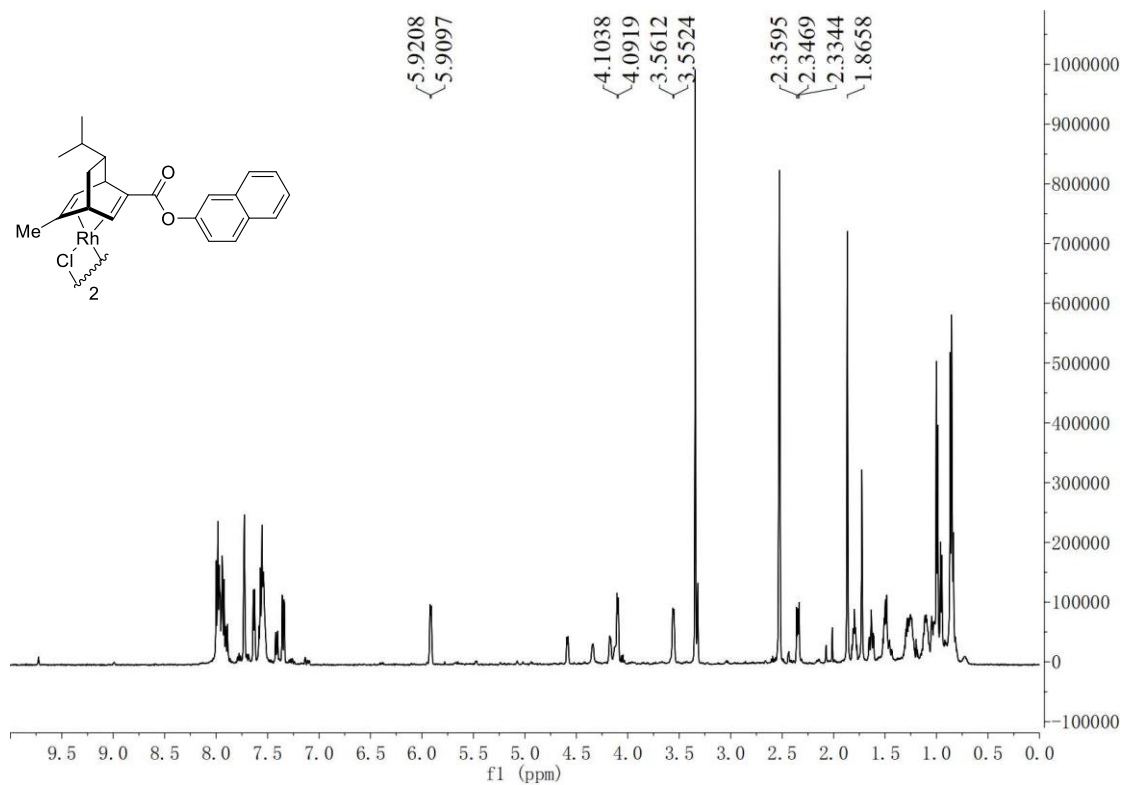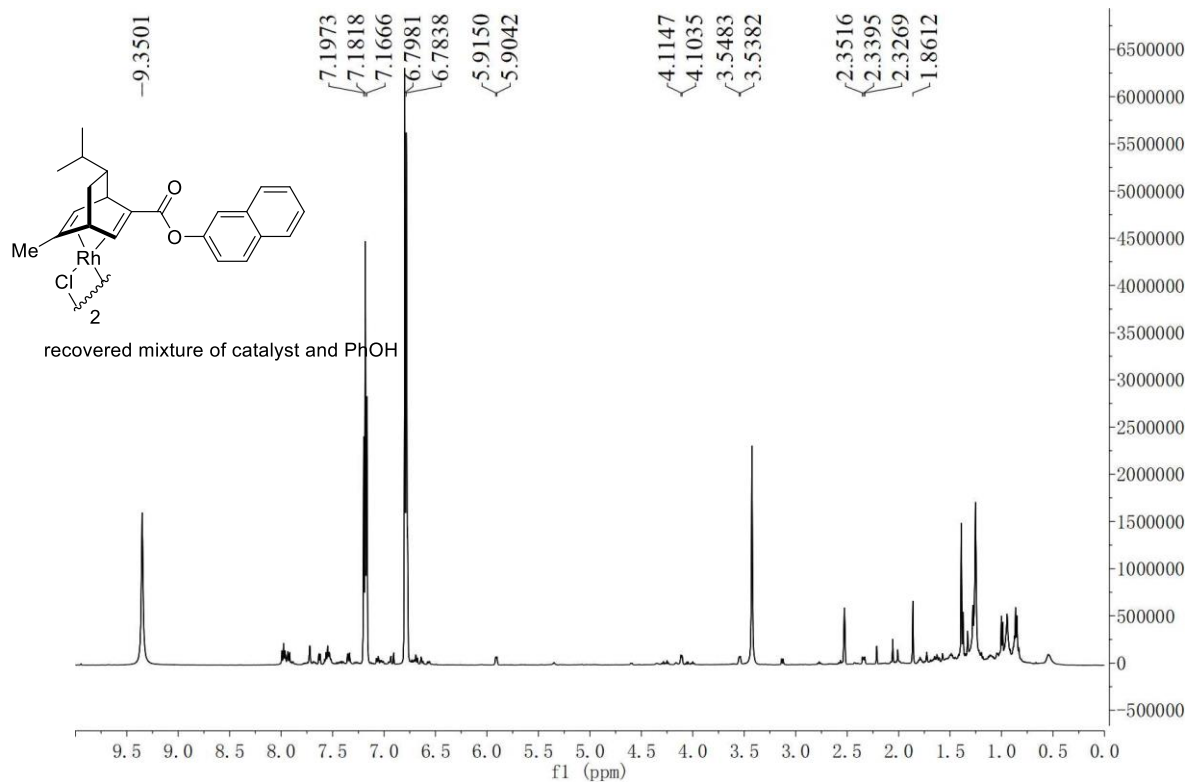

## 11.HPLC Charts

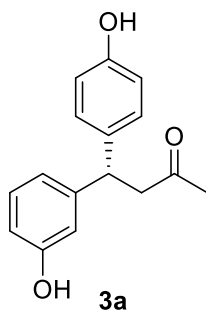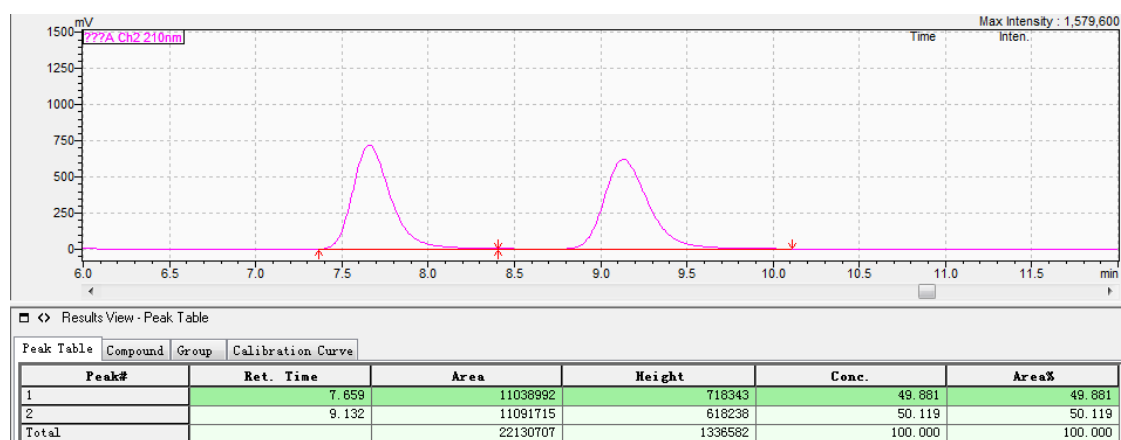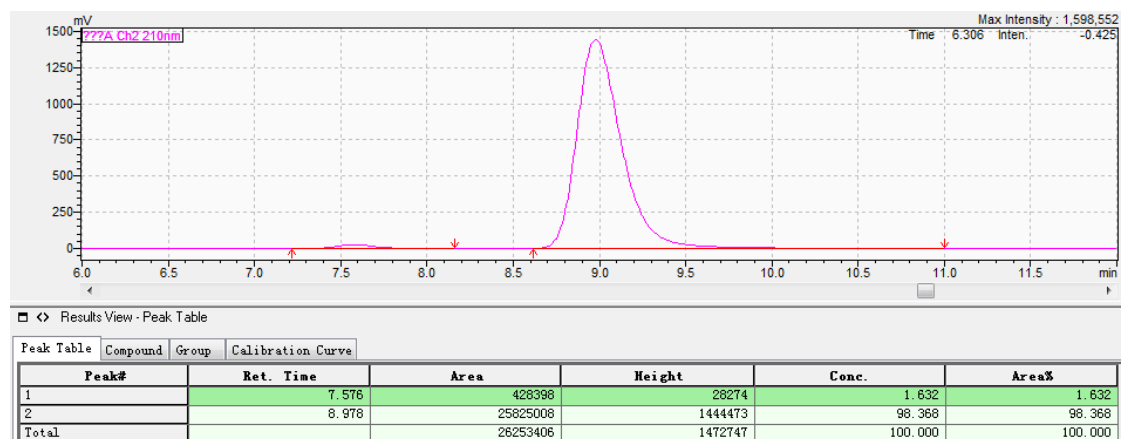

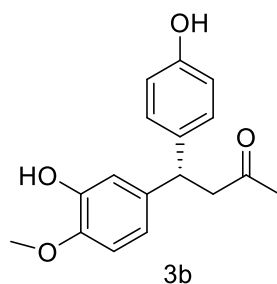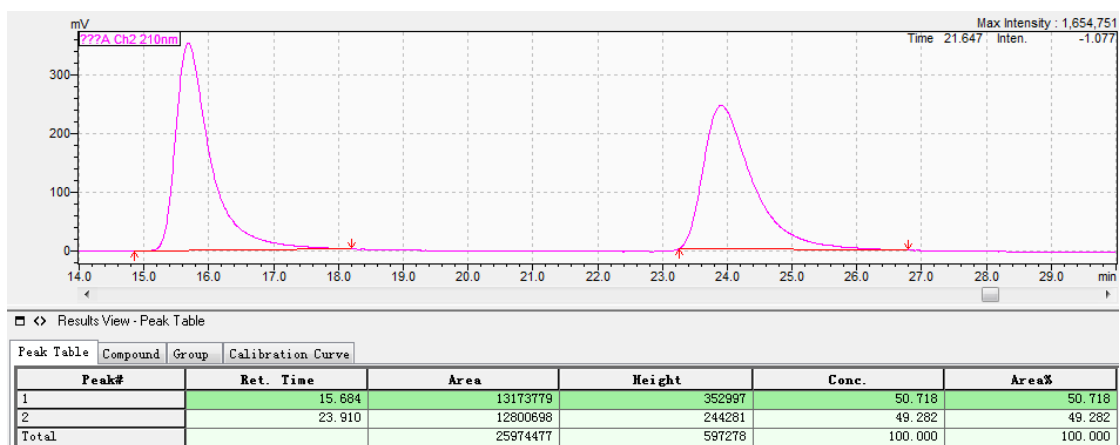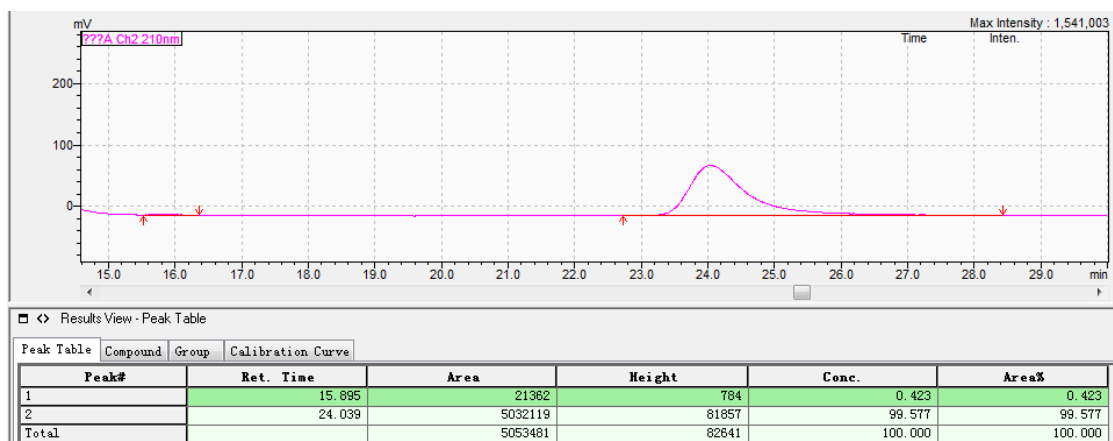

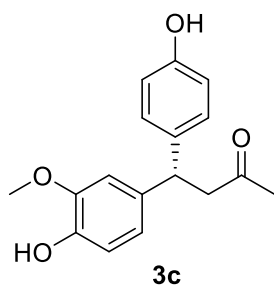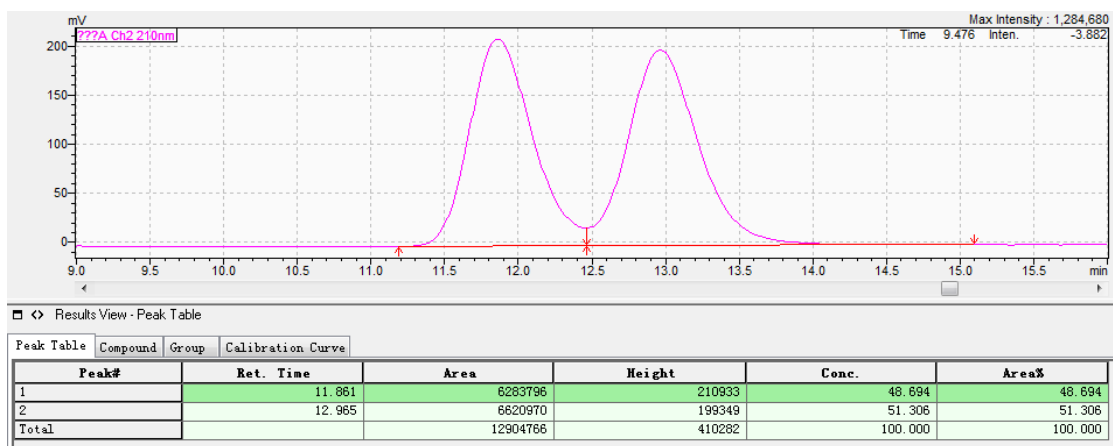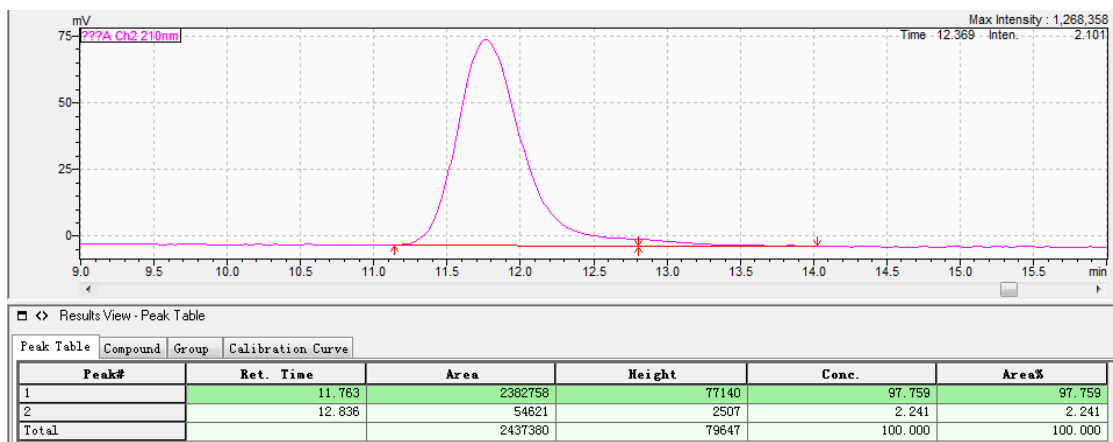

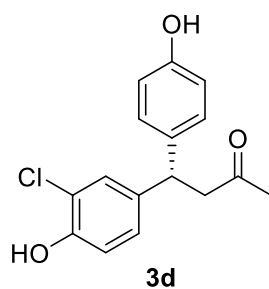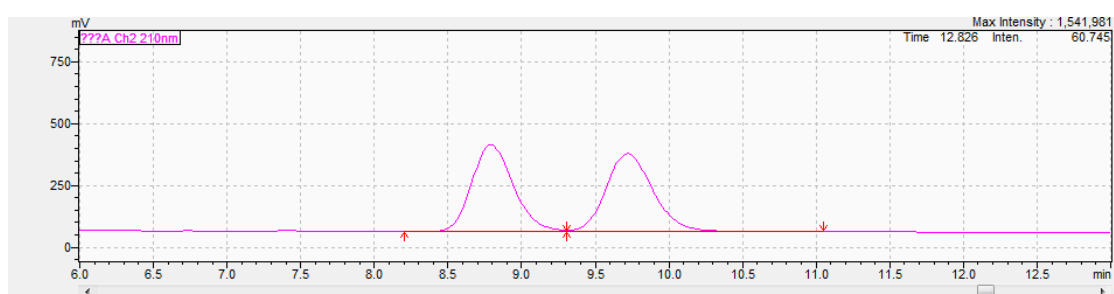

Results View - Peak Table

Peak Table Compound Group Calibration Curve

| Peak# | Ret. Time | Area     | Height | Conc.   | Area%   |
|-------|-----------|----------|--------|---------|---------|
| 1     | 8.791     | 6927301  | 351849 | 49.575  | 49.575  |
| 2     | 9.720     | 7046148  | 316632 | 50.425  | 50.425  |
| Total |           | 13973449 | 668481 | 100.000 | 100.000 |

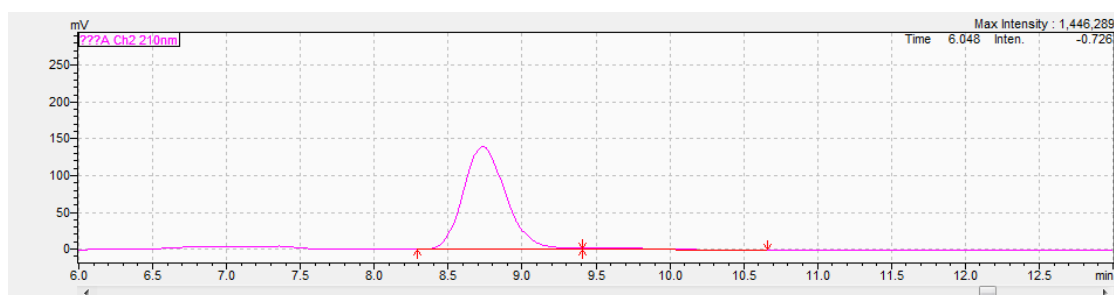

Results View - Peak Table

Peak Table Compound Group Calibration Curve

| Peak# | Ret. Time | Area    | Height | Conc.   | Area%   |
|-------|-----------|---------|--------|---------|---------|
| 1     | 8.734     | 2809742 | 140020 | 97.625  | 97.625  |
| 2     | 9.656     | 68353   | 2734   | 2.375   | 2.375   |
| Total |           | 2878095 | 142754 | 100.000 | 100.000 |

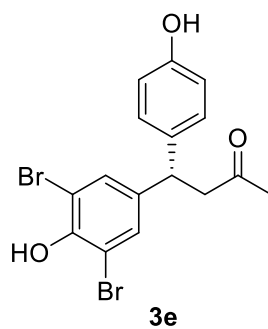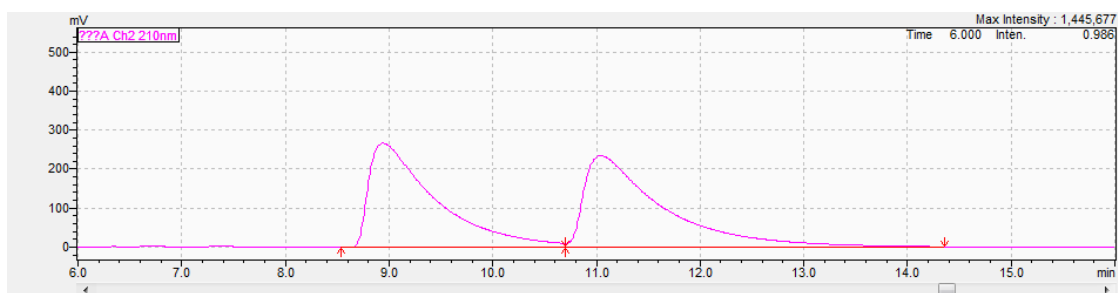

Results View - Peak Table

| Peak# | Ret. Time | Area     | Height | Conc.   | Area%   |
|-------|-----------|----------|--------|---------|---------|
| 1     | 8.941     | 11893692 | 267462 | 49.303  | 49.303  |
| 2     | 11.040    | 12229977 | 235293 | 50.697  | 50.697  |
| Total |           | 24123669 | 502755 | 100.000 | 100.000 |

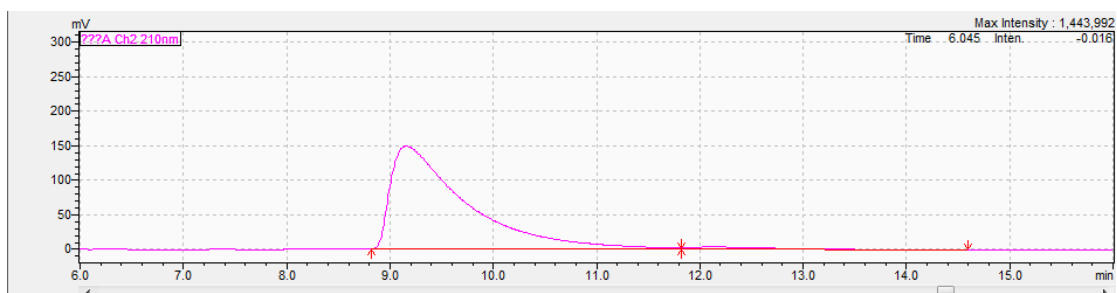

Results View - Peak Table

| Peak# | Ret. Time | Area    | Height | Conc.   | Area%   |
|-------|-----------|---------|--------|---------|---------|
| 1     | 9.159     | 7486376 | 148417 | 97.241  | 97.241  |
| 2     | 12.118    | 212394  | 3427   | 2.759   | 2.759   |
| Total |           | 7698770 | 151844 | 100.000 | 100.000 |

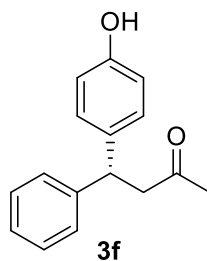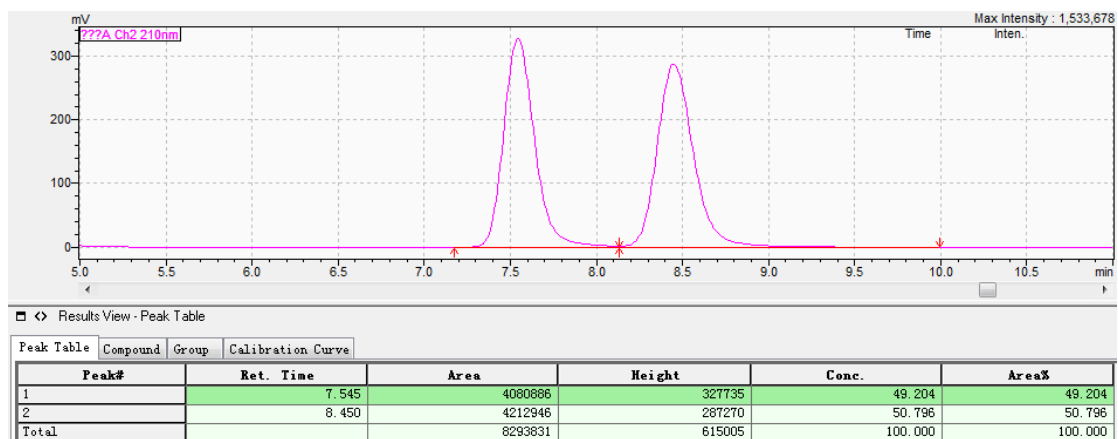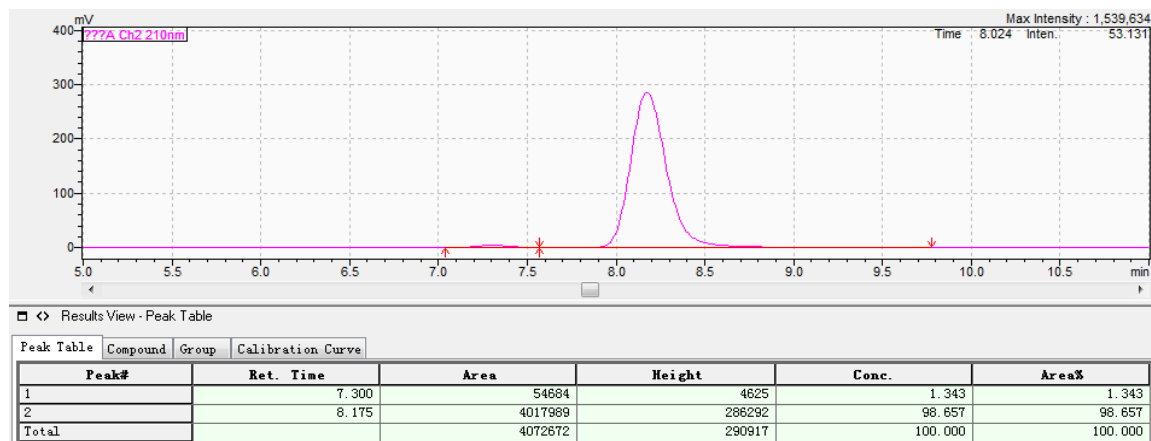

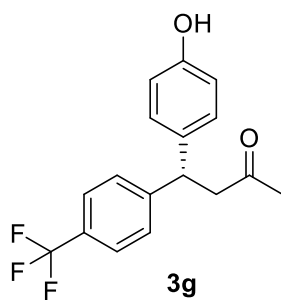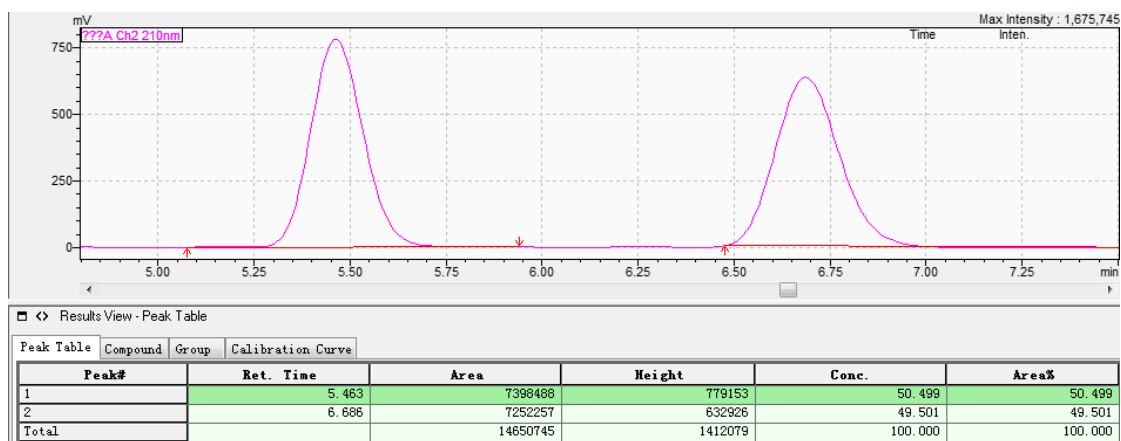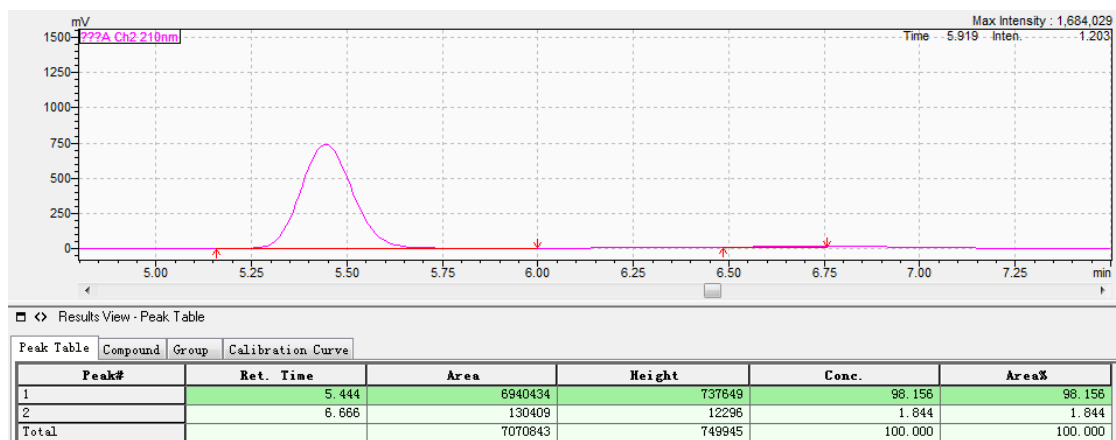

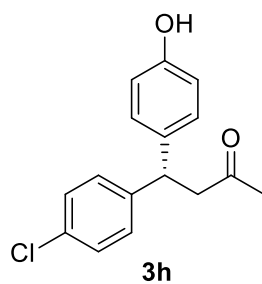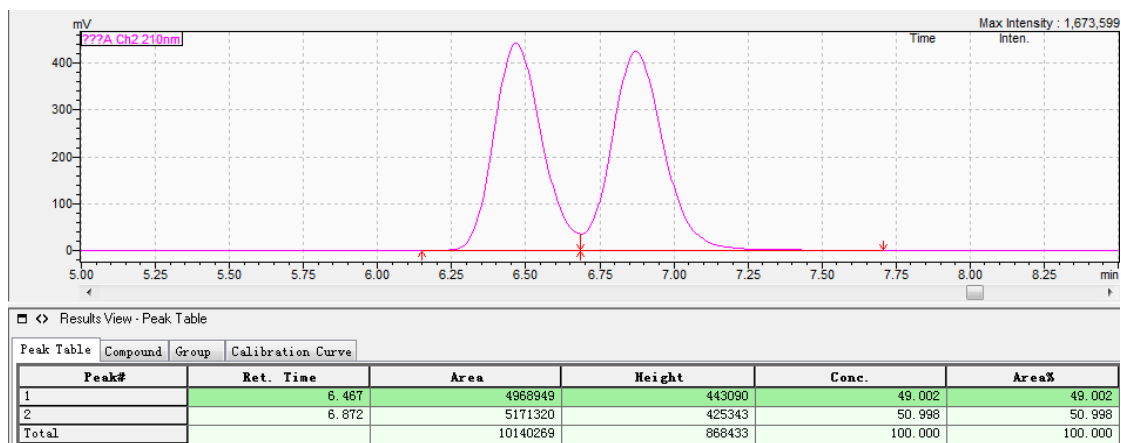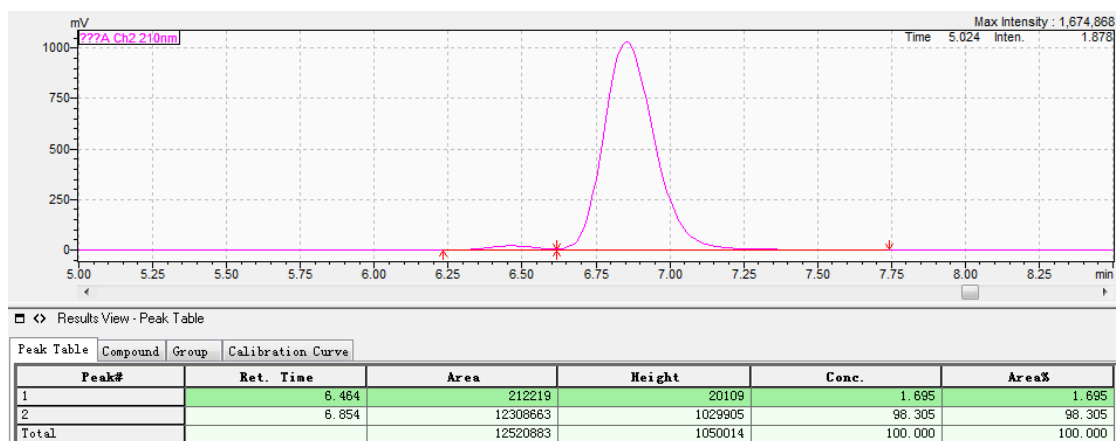

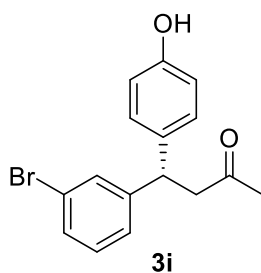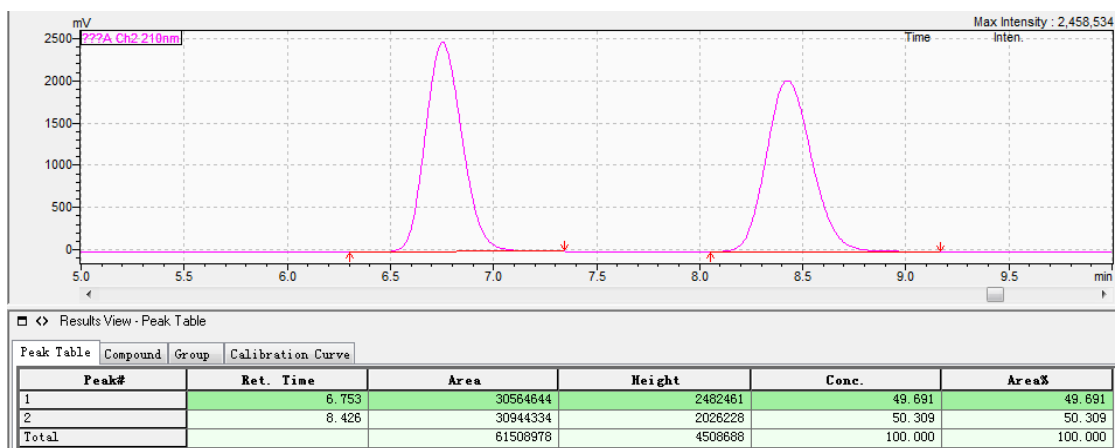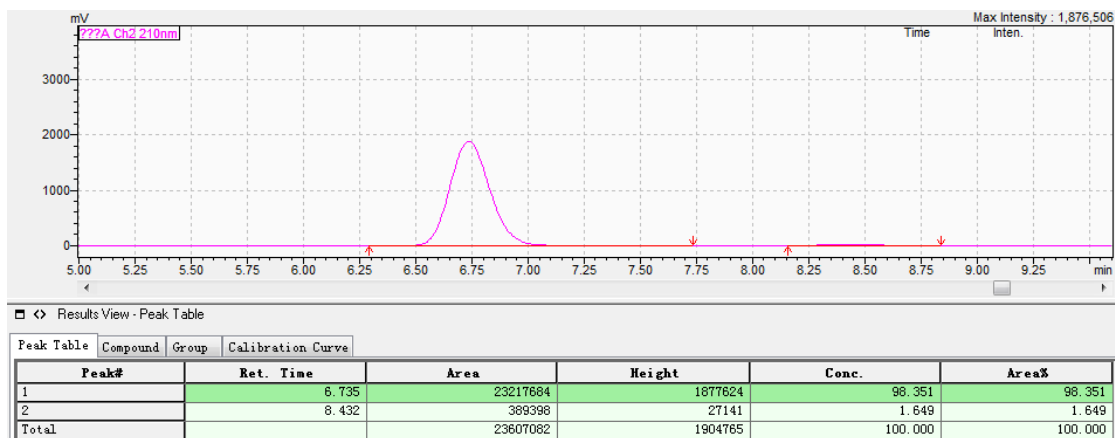

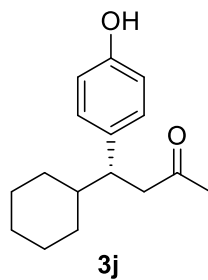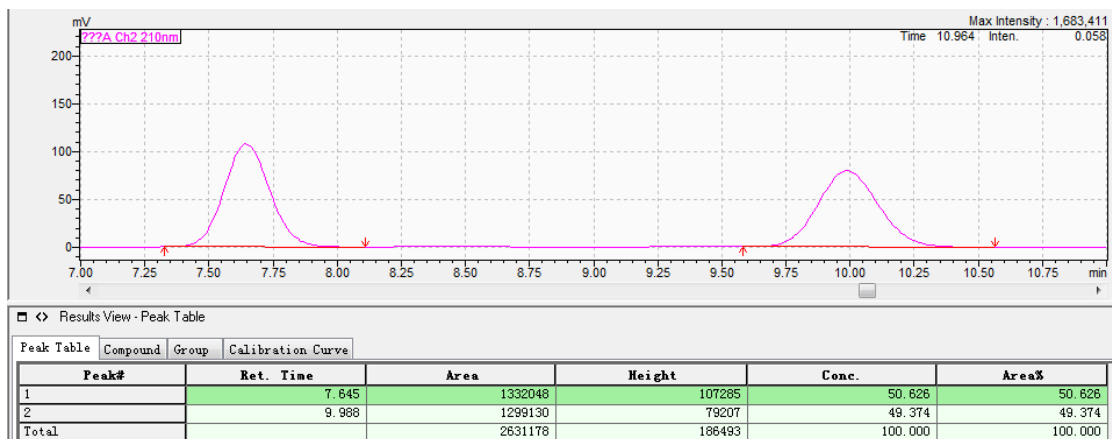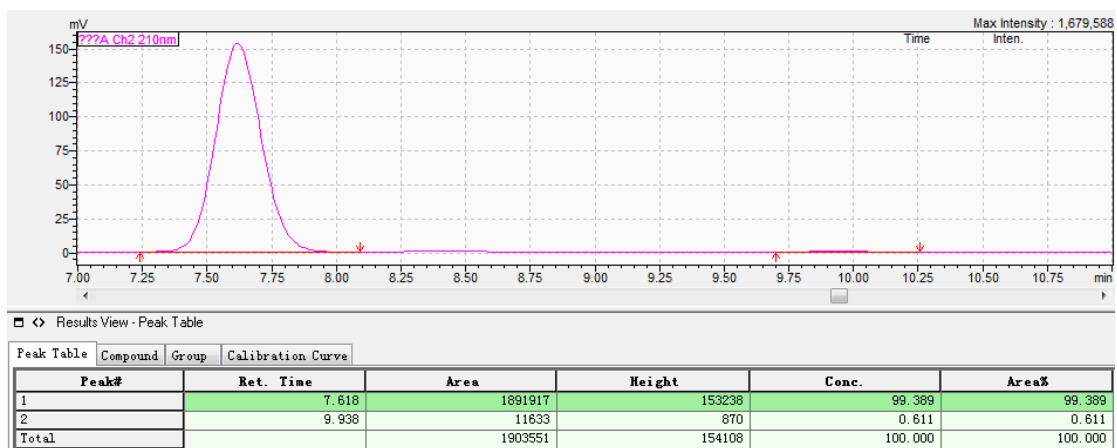

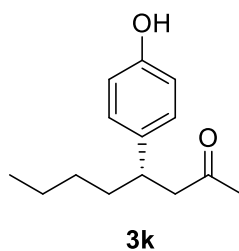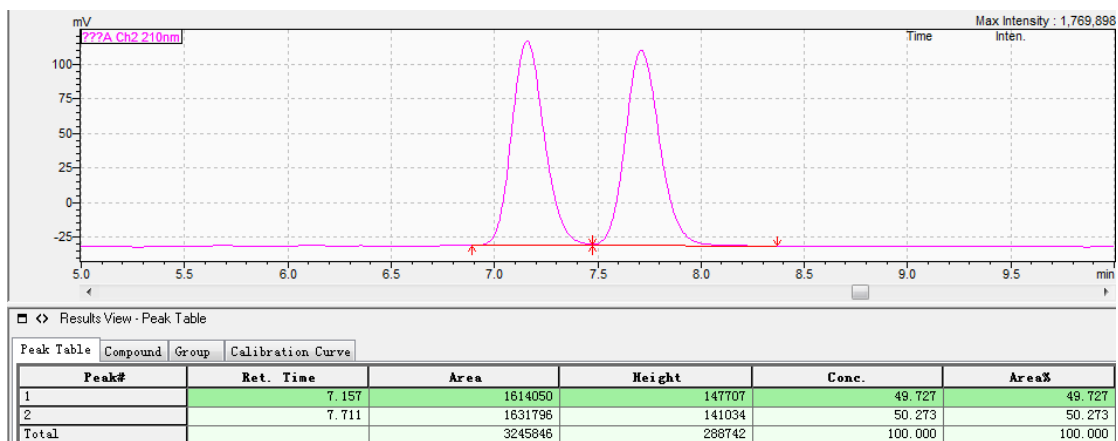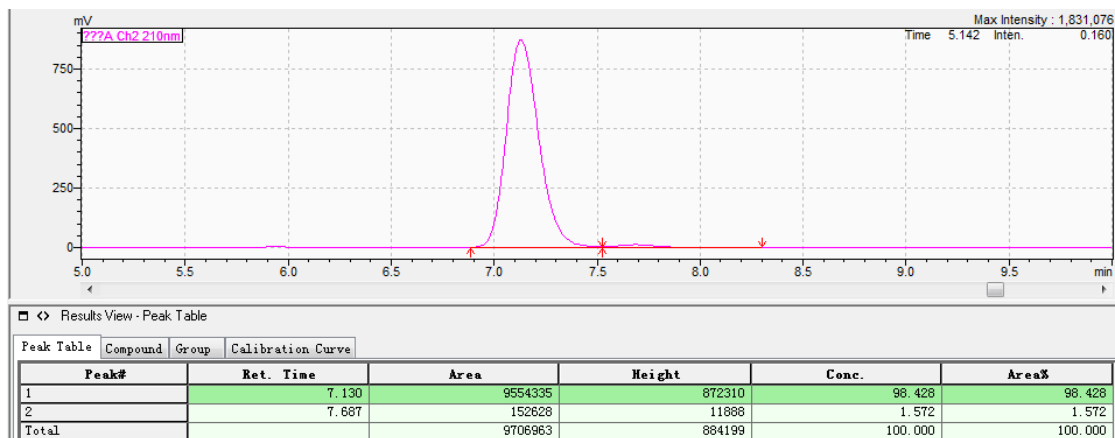

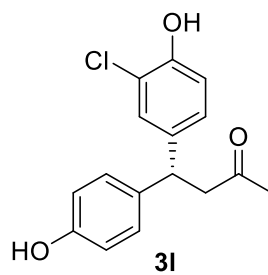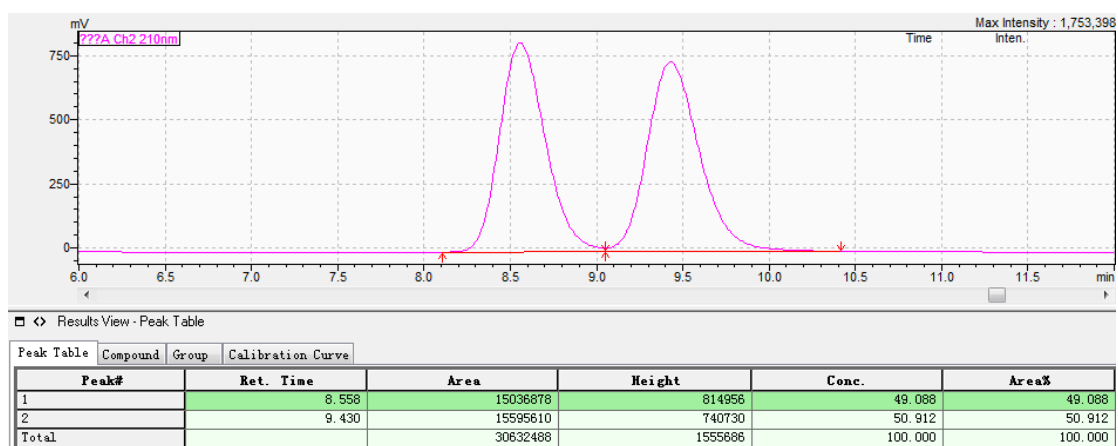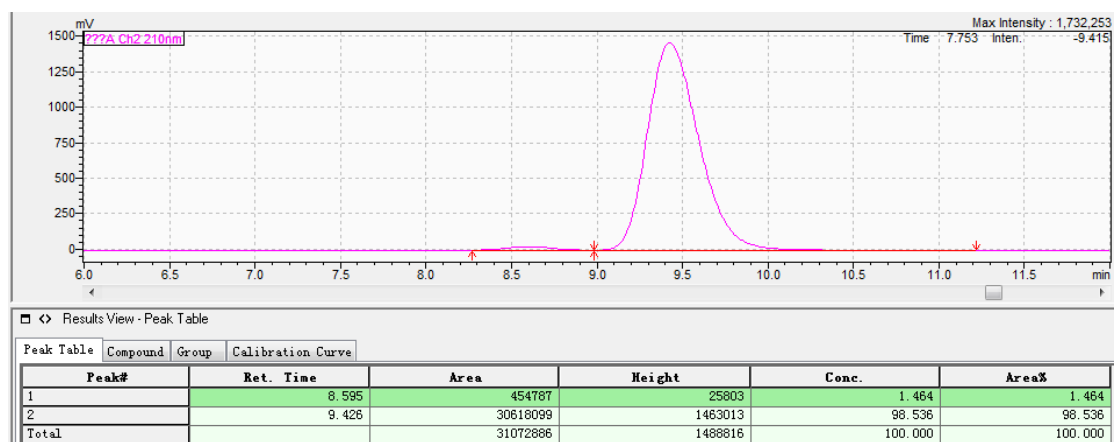

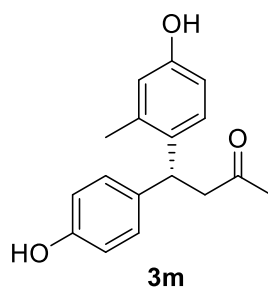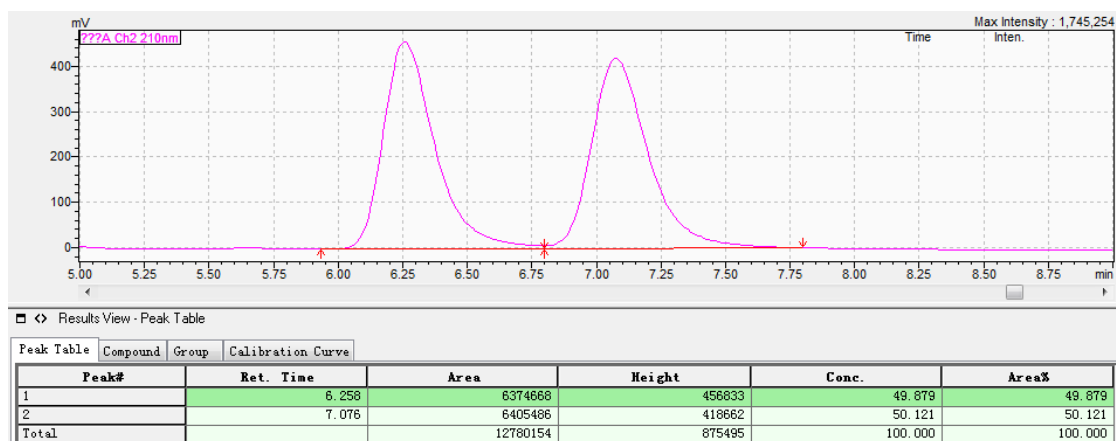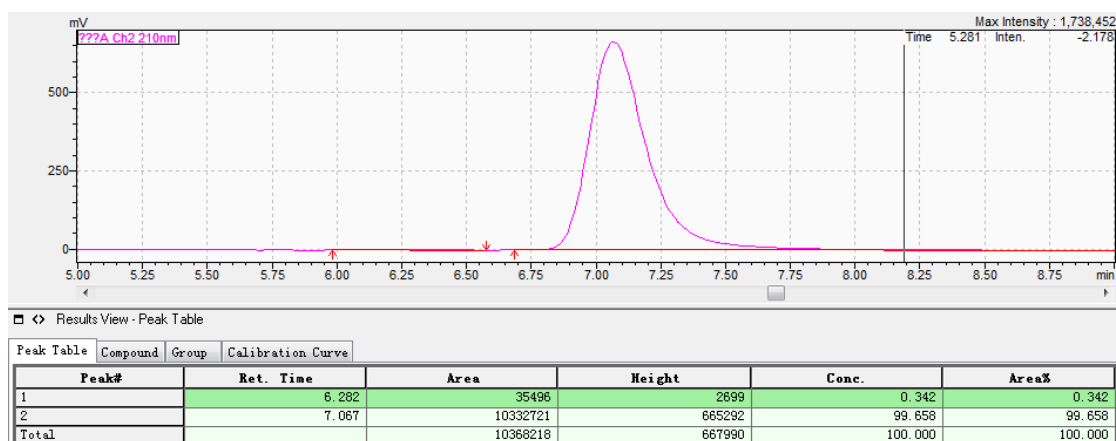

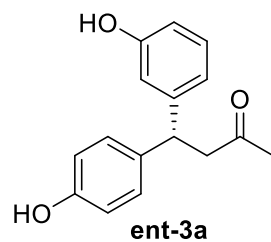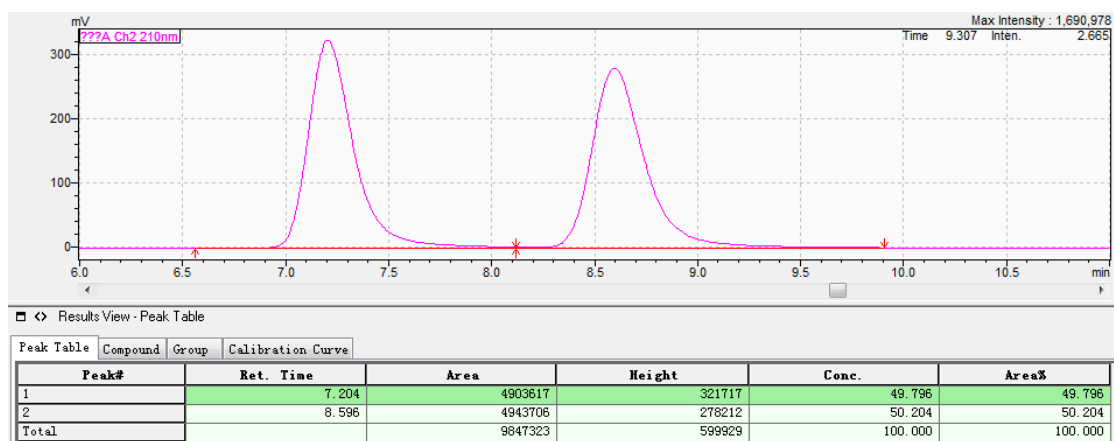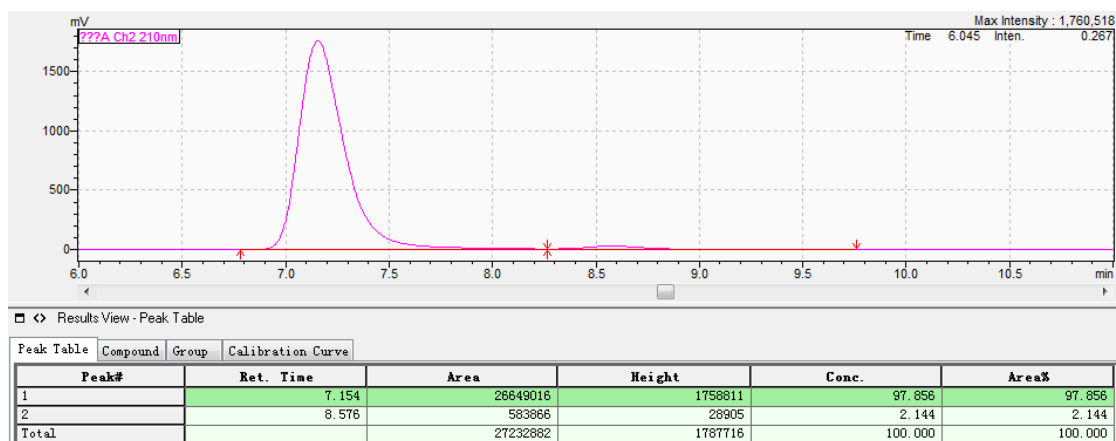

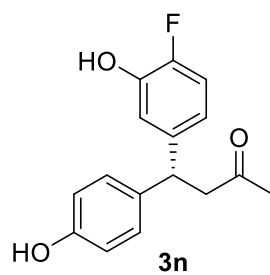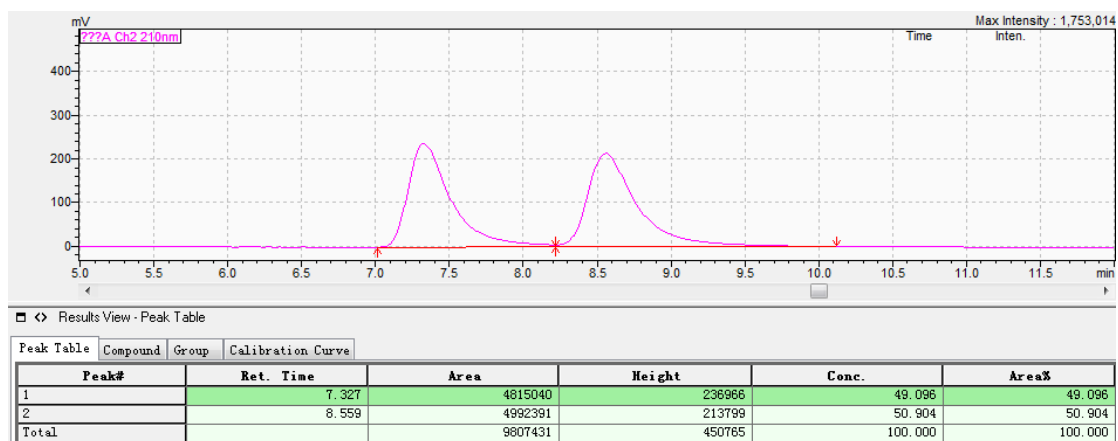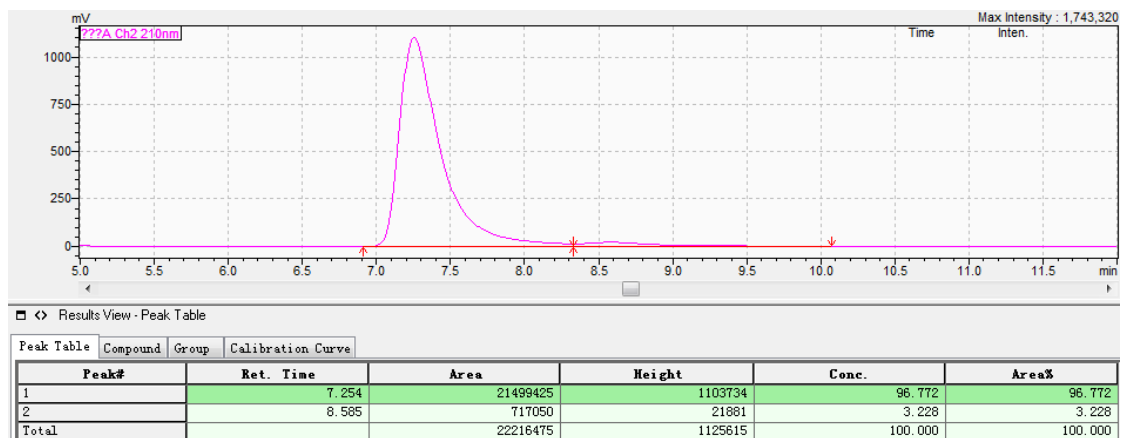

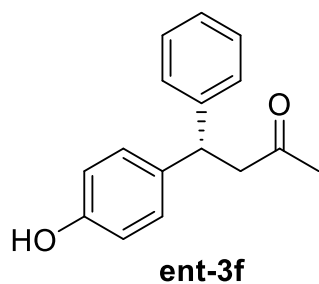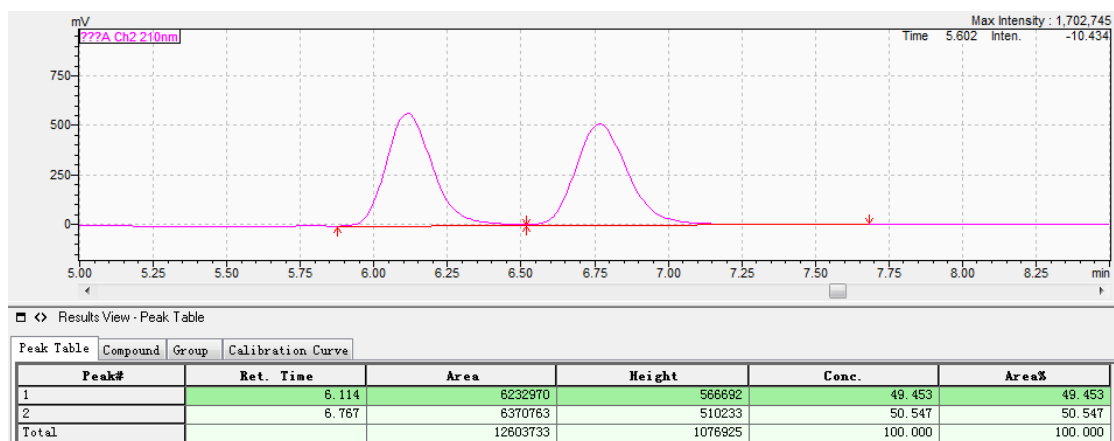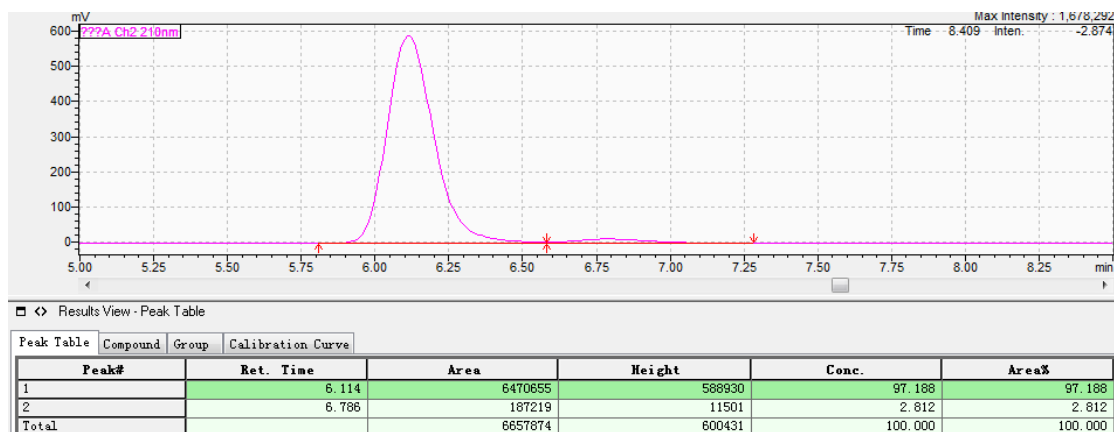

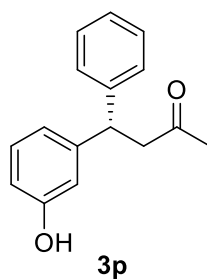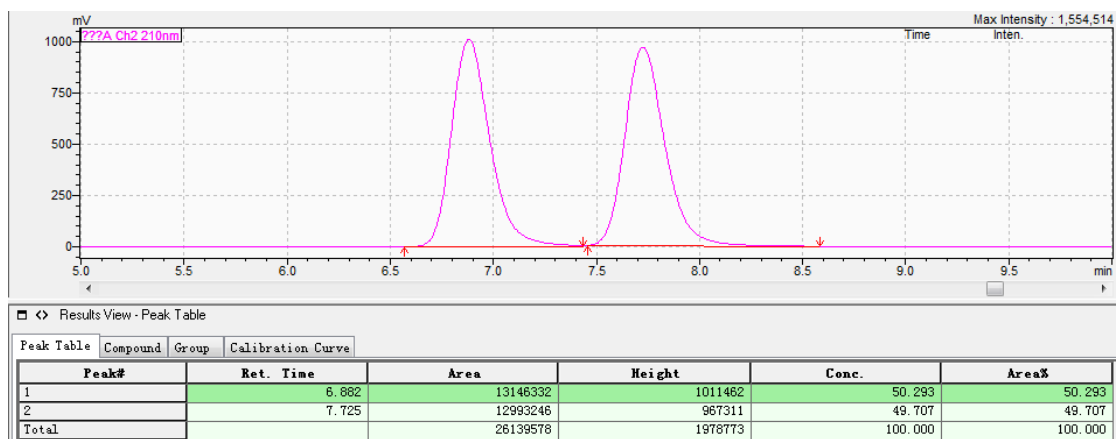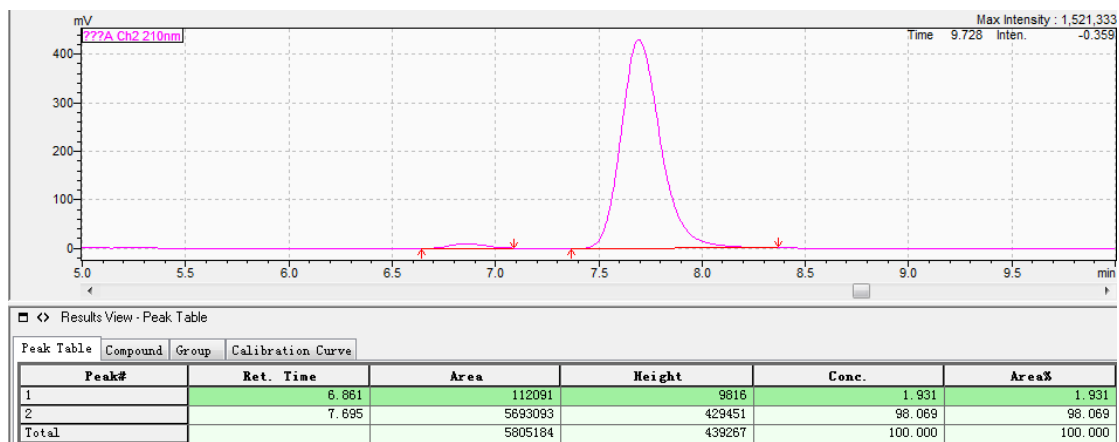

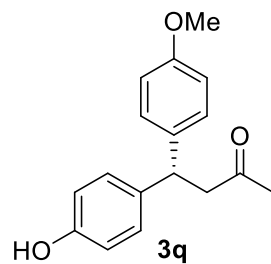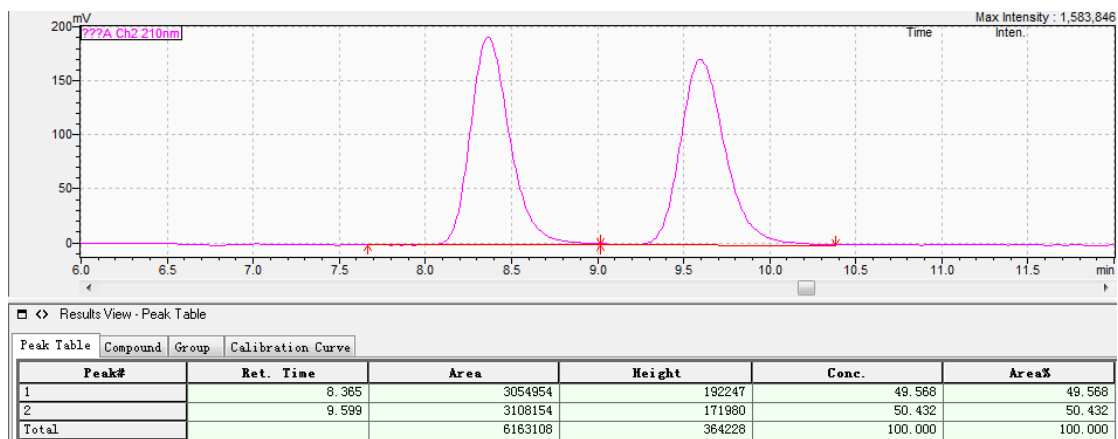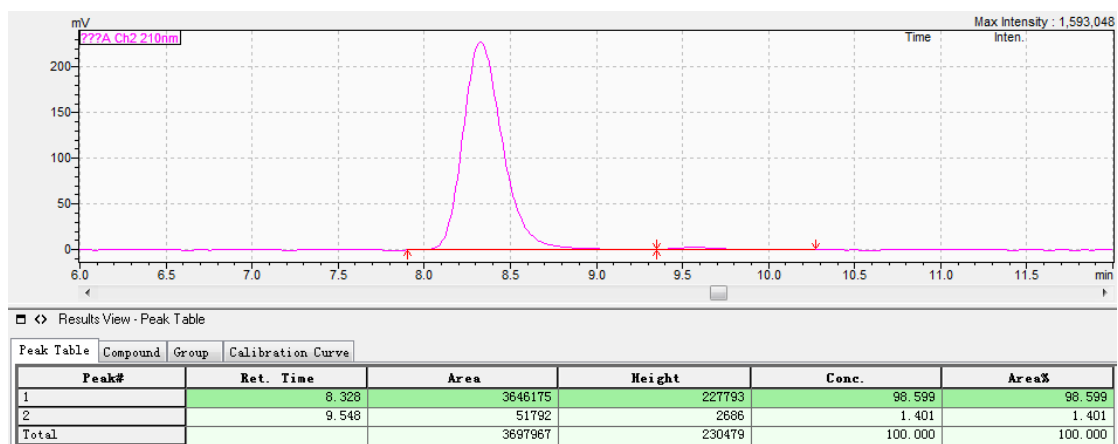

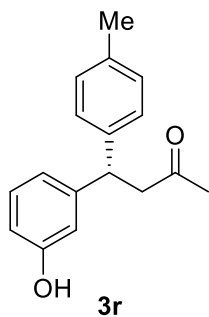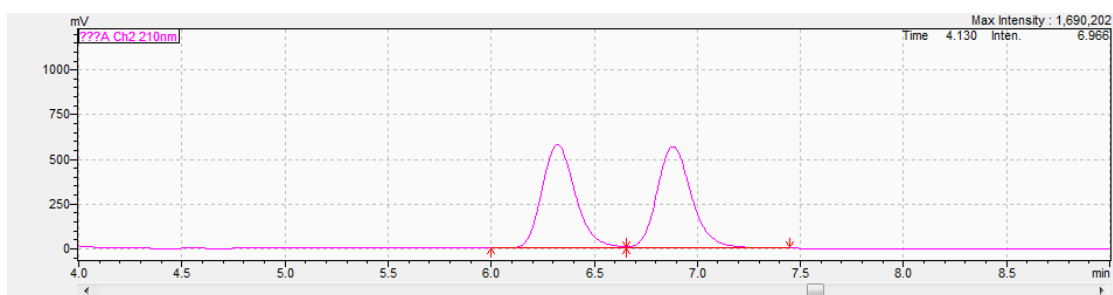

Results View - Peak Table

Peak Table Compound Group Calibration Curve

| Peak# | Ret. Time | Area     | Height  | Conc.   | Area%   |
|-------|-----------|----------|---------|---------|---------|
| 1     | 6.322     | 6544555  | 579239  | 49.751  | 49.751  |
| 2     | 6.882     | 6610062  | 567843  | 50.249  | 50.249  |
| Total |           | 13154617 | 1147082 | 100.000 | 100.000 |

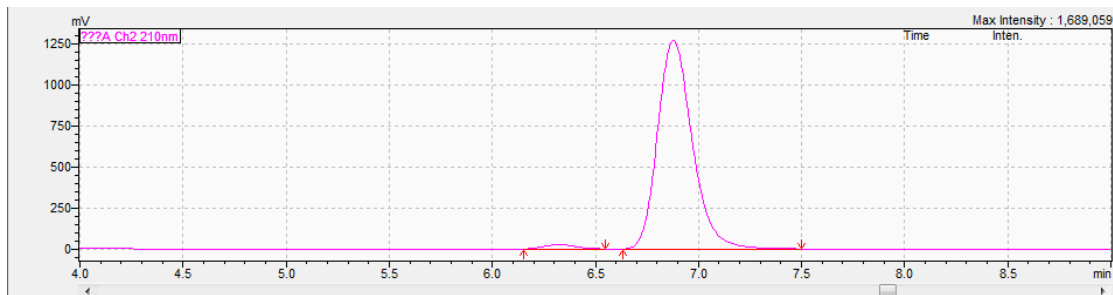

Results View - Peak Table

Peak Table Compound Group Calibration Curve

| Peak# | Ret. Time | Area     | Height  | Conc.   | Area%   |
|-------|-----------|----------|---------|---------|---------|
| 1     | 6.324     | 263195   | 25093   | 1.744   | 1.744   |
| 2     | 6.878     | 14830151 | 1269613 | 98.256  | 98.256  |
| Total |           | 15093346 | 1294706 | 100.000 | 100.000 |

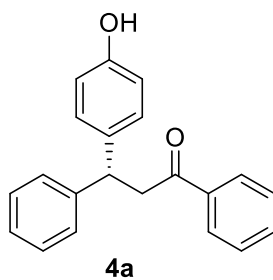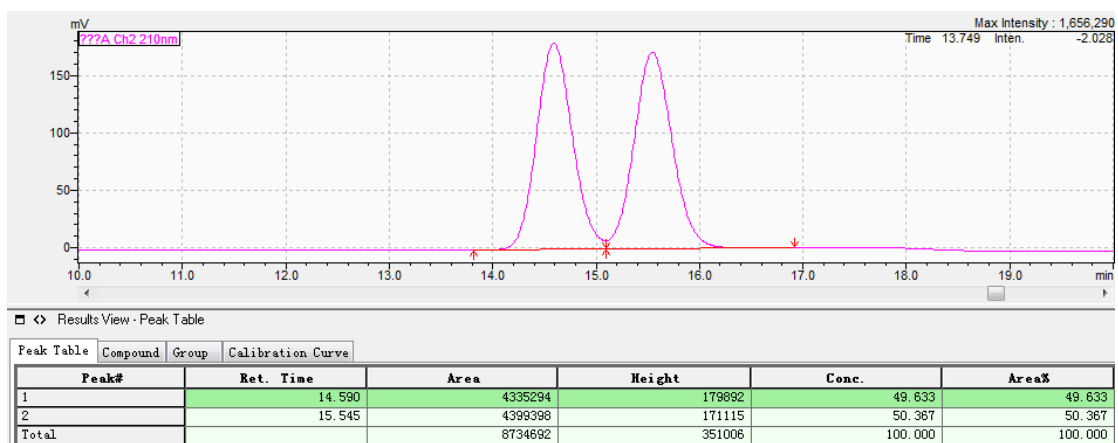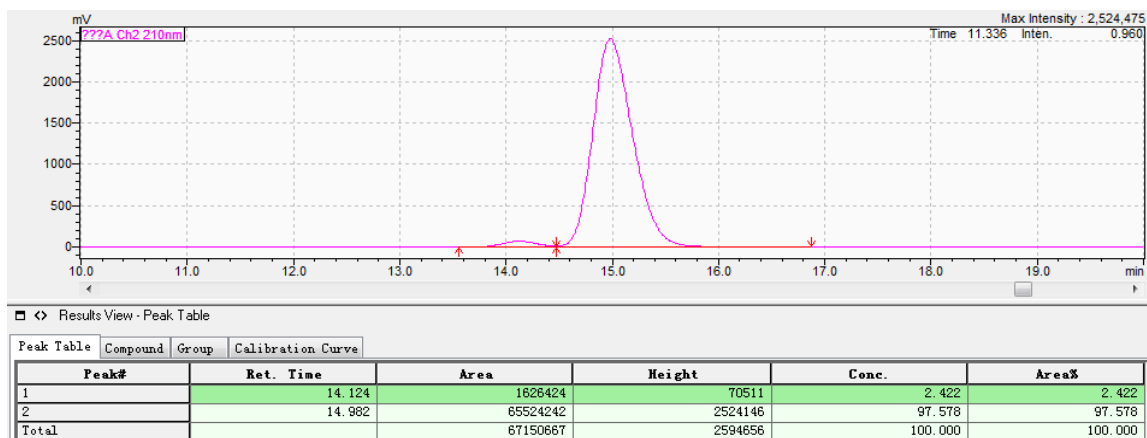

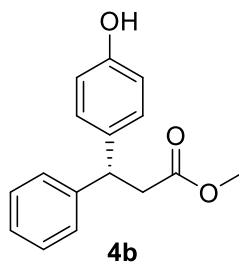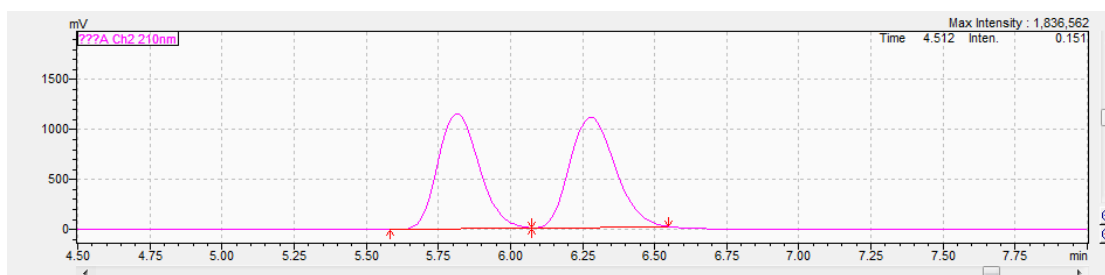

Results View - Peak Table

| Peak# | Ret. Time | Area     | Height  | Conc.   | Area%   |
|-------|-----------|----------|---------|---------|---------|
| 1     | 5.815     | 11375098 | 1151292 | 48.556  | 48.556  |
| 2     | 6.278     | 12052355 | 1101761 | 51.444  | 51.444  |
| Total |           | 23428053 | 2253052 | 100.000 | 100.000 |

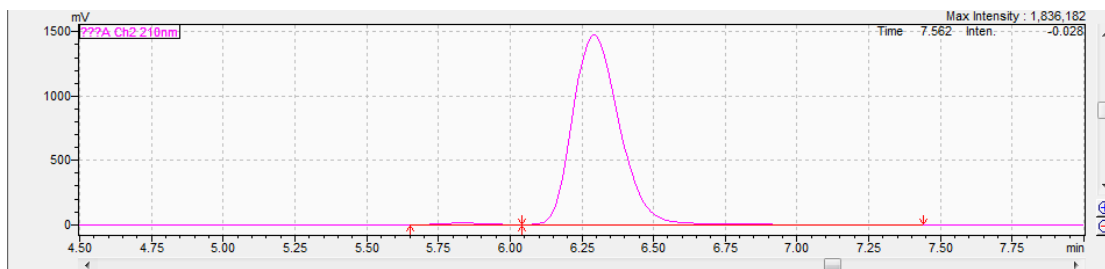

Results View - Peak Table

| Peak# | Ret. Time | Area     | Height  | Conc.   | Area%   |
|-------|-----------|----------|---------|---------|---------|
| 1     | 5.834     | 125200   | 13319   | 0.746   | 0.746   |
| 2     | 6.291     | 16660609 | 1474530 | 99.254  | 99.254  |
| Total |           | 16785809 | 1487849 | 100.000 | 100.000 |

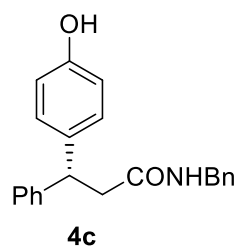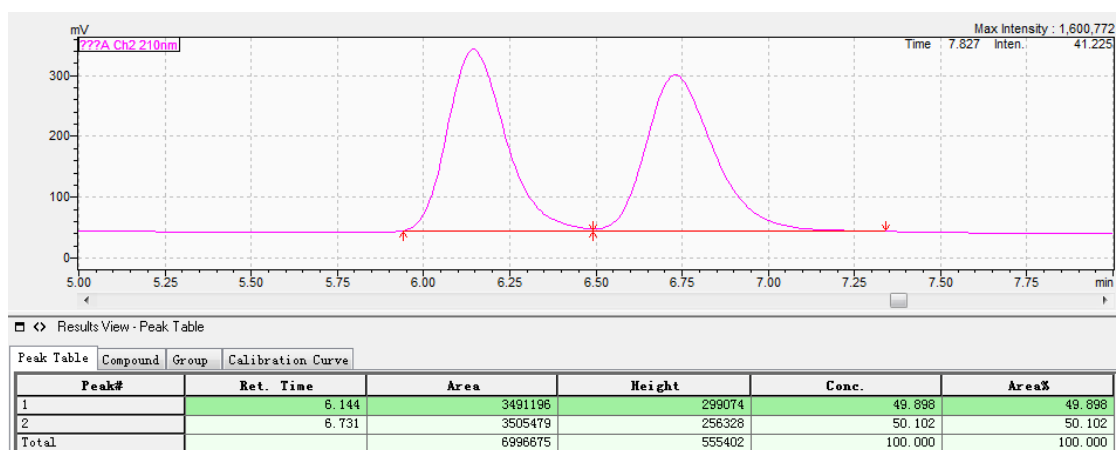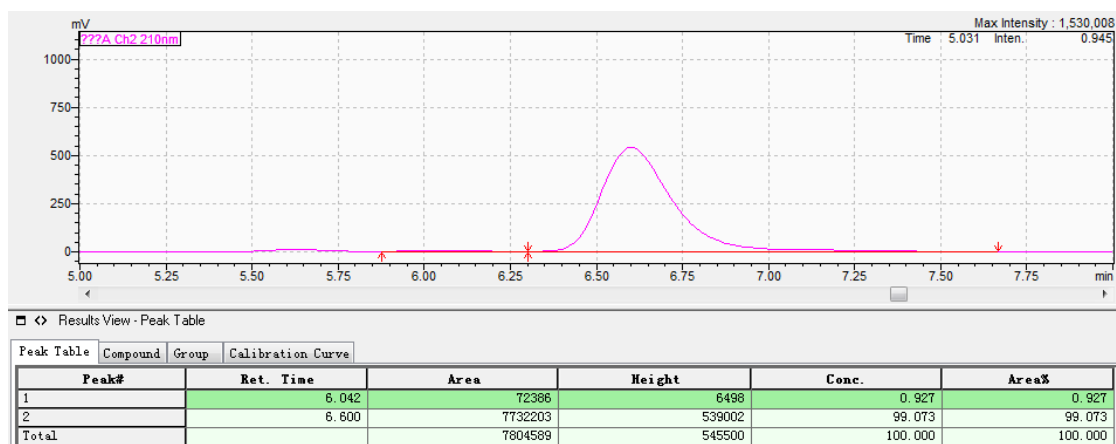

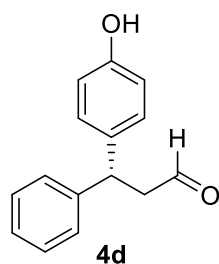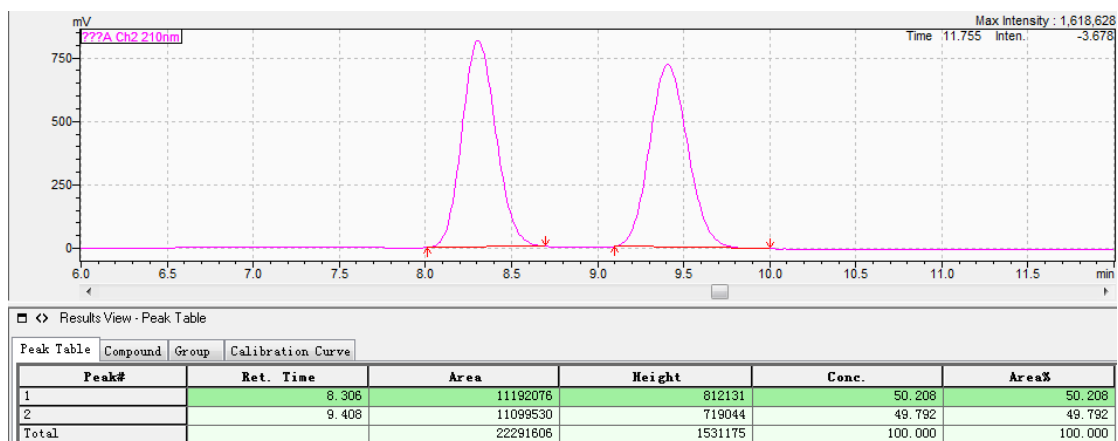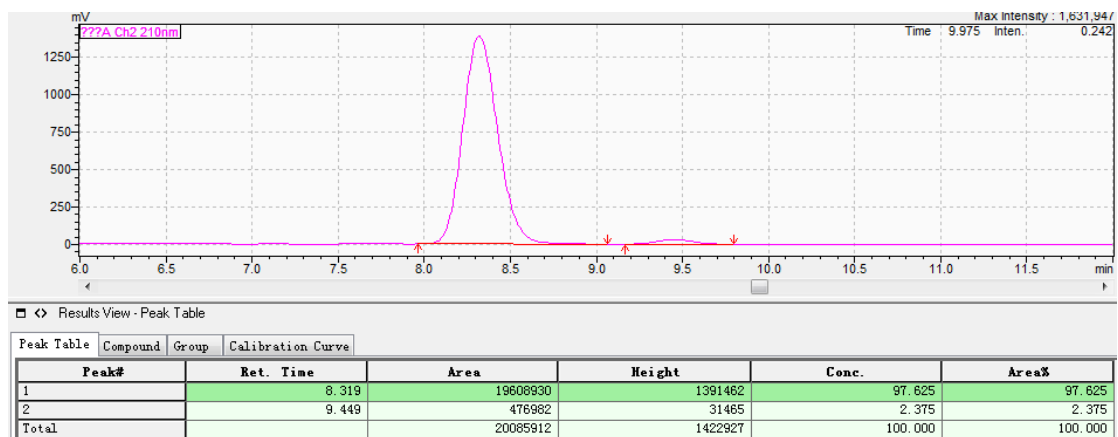

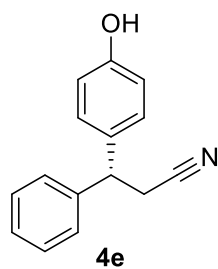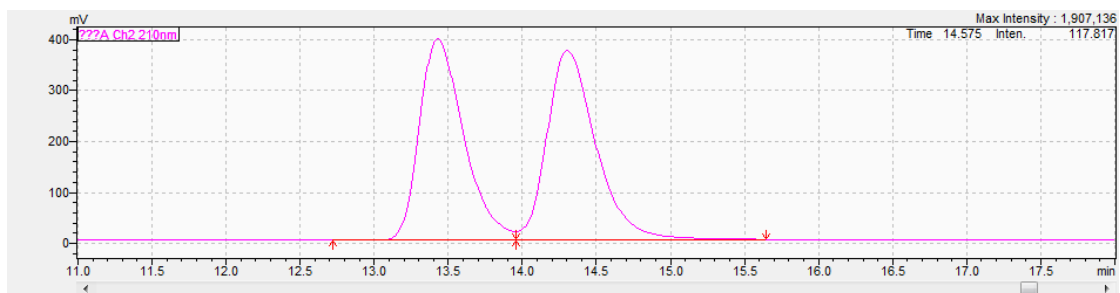

Results View - Peak Table

| Peak# | Ret. Time | Area     | Height | Conc.   | Area%   |
|-------|-----------|----------|--------|---------|---------|
| 1     | 13.428    | 8213347  | 395300 | 49.109  | 49.109  |
| 2     | 14.303    | 8511446  | 371403 | 50.891  | 50.891  |
| Total |           | 16724793 | 766703 | 100.000 | 100.000 |

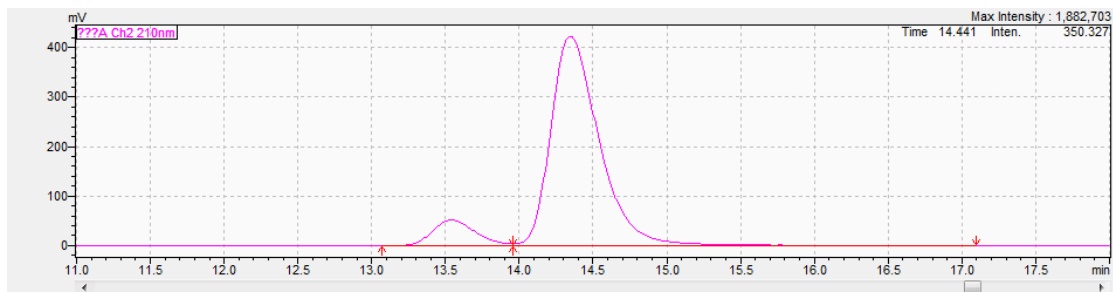

Results View - Peak Table

| Peak# | Ret. Time | Area     | Height | Conc.   | Area%   |
|-------|-----------|----------|--------|---------|---------|
| 1     | 13.542    | 1054321  | 52018  | 9.856   | 9.856   |
| 2     | 14.347    | 9643387  | 422906 | 90.144  | 90.144  |
| Total |           | 10697688 | 474924 | 100.000 | 100.000 |

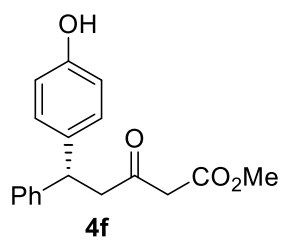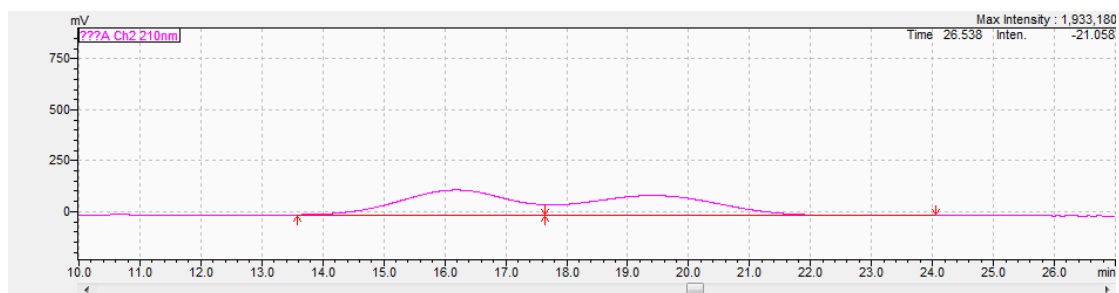

Results View - Peak Table

Peak Table Compound Group Calibration Curve

| Peak# | Ret. Time | Area     | Height | Conc.   | Area%   |
|-------|-----------|----------|--------|---------|---------|
| 1     | 16.160    | 15415761 | 122513 | 50.417  | 50.417  |
| 2     | 19.408    | 15160612 | 96998  | 49.583  | 49.583  |
| Total |           | 30576373 | 219511 | 100.000 | 100.000 |

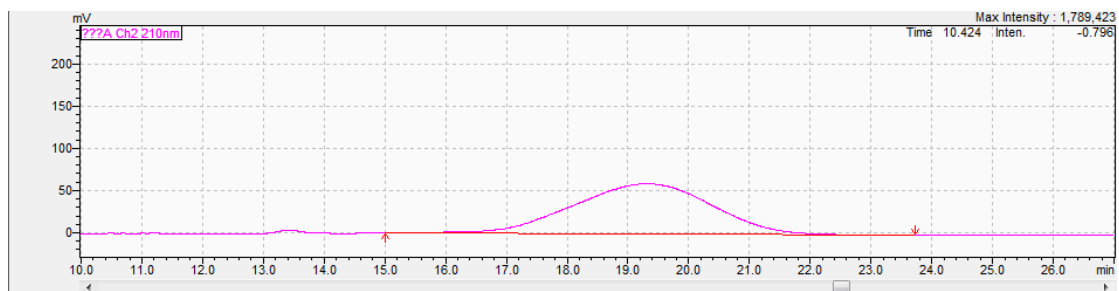

Results View - Peak Table

Peak Table Compound Group Calibration Curve

| Peak# | Ret. Time | Area    | Height | Conc.   | Area%   |
|-------|-----------|---------|--------|---------|---------|
| 1     | 19.344    | 9501035 | 59522  | 100.000 | 100.000 |
| Total |           | 9501035 | 59522  | 100.000 | 100.000 |

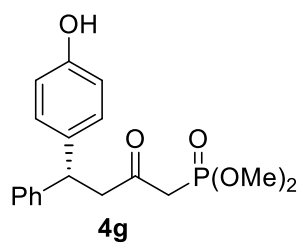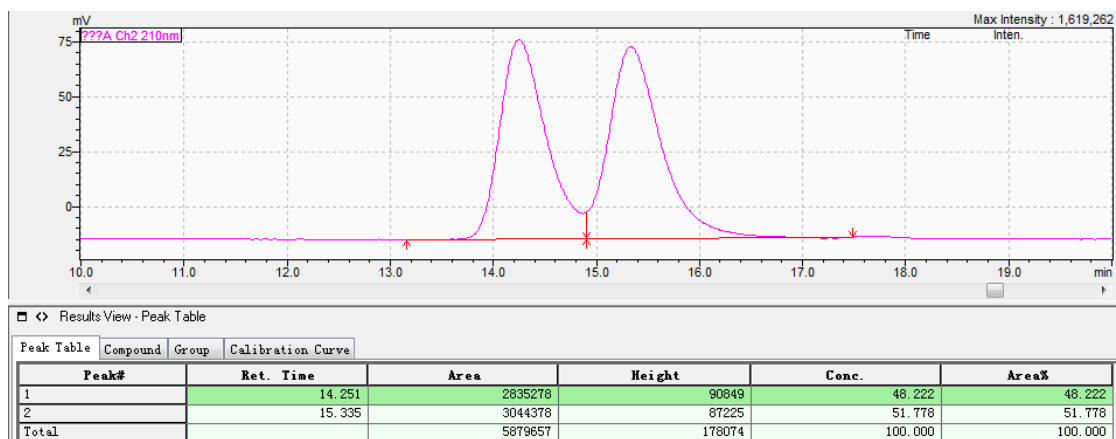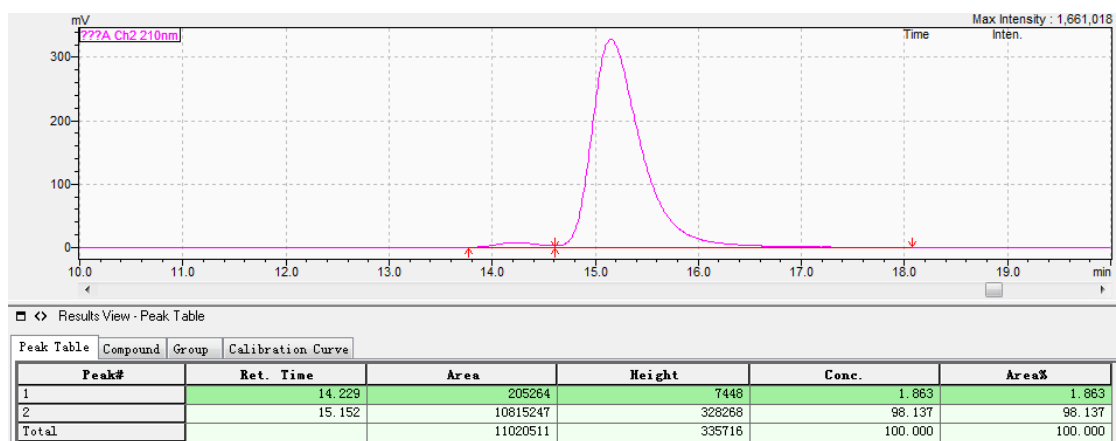

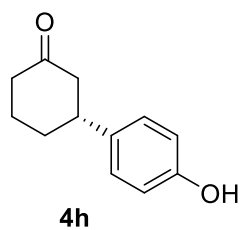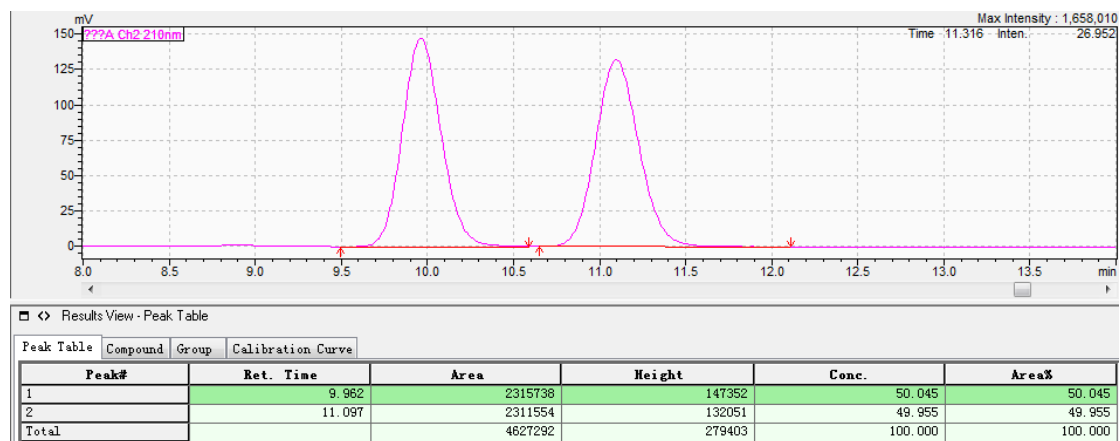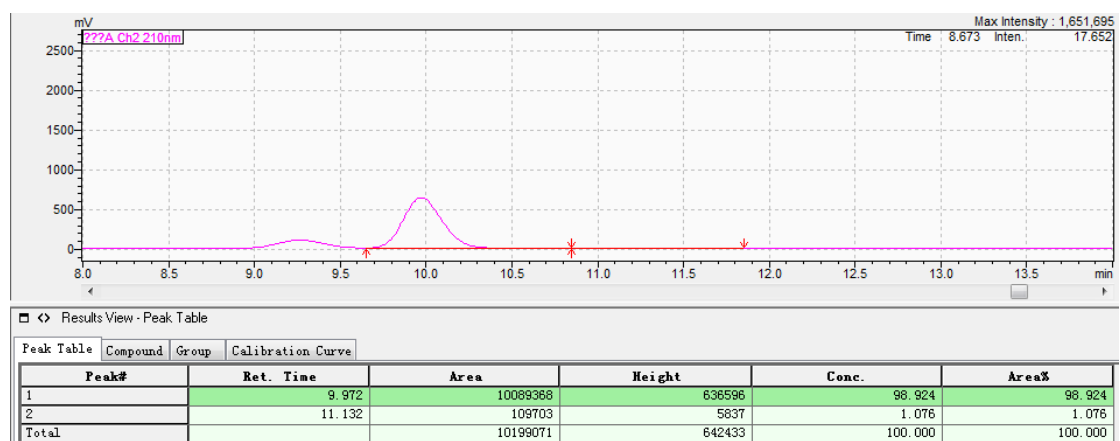

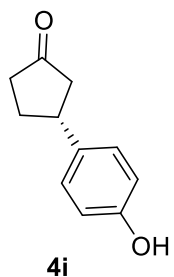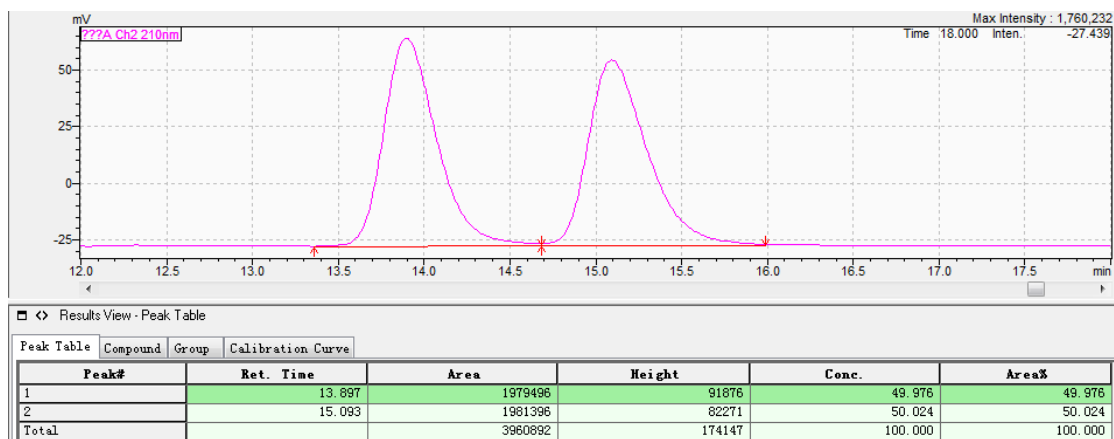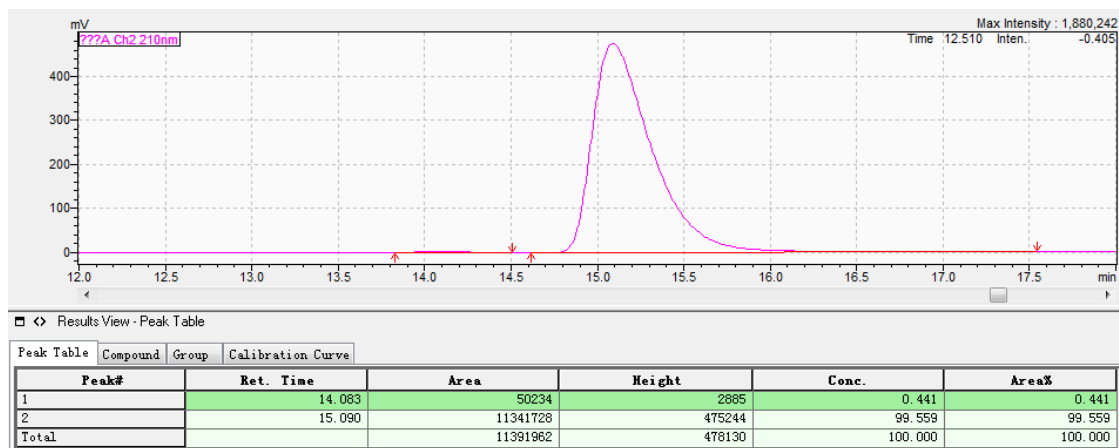

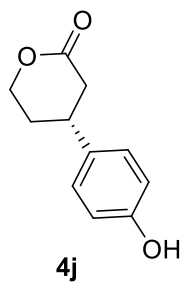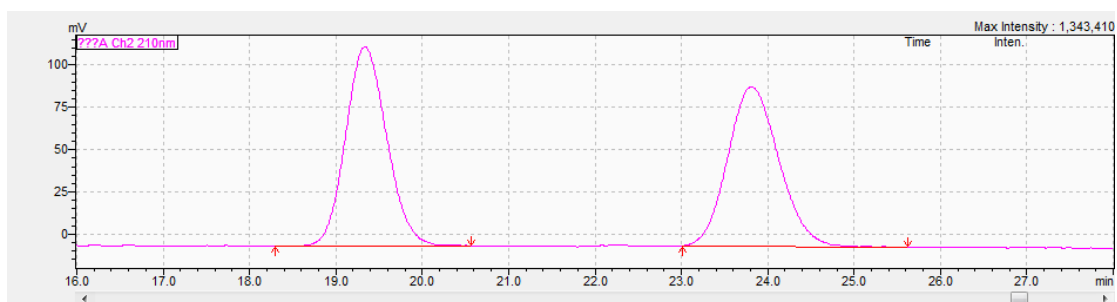

Results View - Peak Table

| Peak# | Ret. Time | Area    | Height | Conc.   | Area%   |
|-------|-----------|---------|--------|---------|---------|
| 1     | 19.335    | 3885830 | 117661 | 49.960  | 49.960  |
| 2     | 23.813    | 3892012 | 94240  | 50.040  | 50.040  |
| Total |           | 7777842 | 211901 | 100.000 | 100.000 |

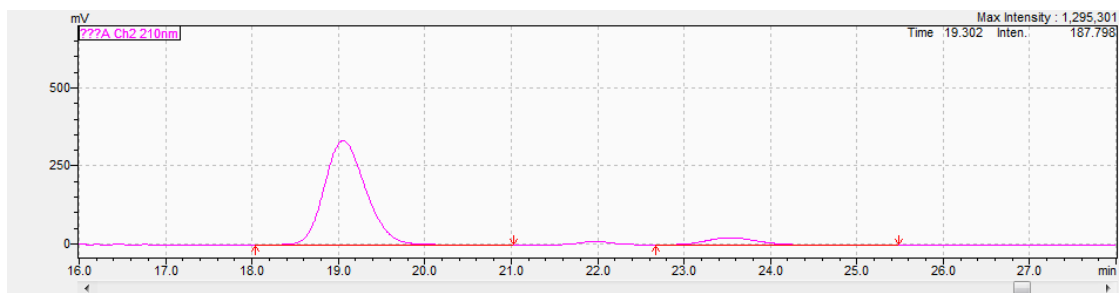

Results View - Peak Table

| Peak# | Ret. Time | Area     | Height | Conc.   | Area%   |
|-------|-----------|----------|--------|---------|---------|
| 1     | 19.054    | 11035474 | 334198 | 92.045  | 92.045  |
| 2     | 23.544    | 953740   | 23303  | 7.955   | 7.955   |
| Total |           | 11989214 | 357501 | 100.000 | 100.000 |

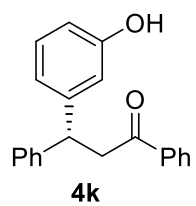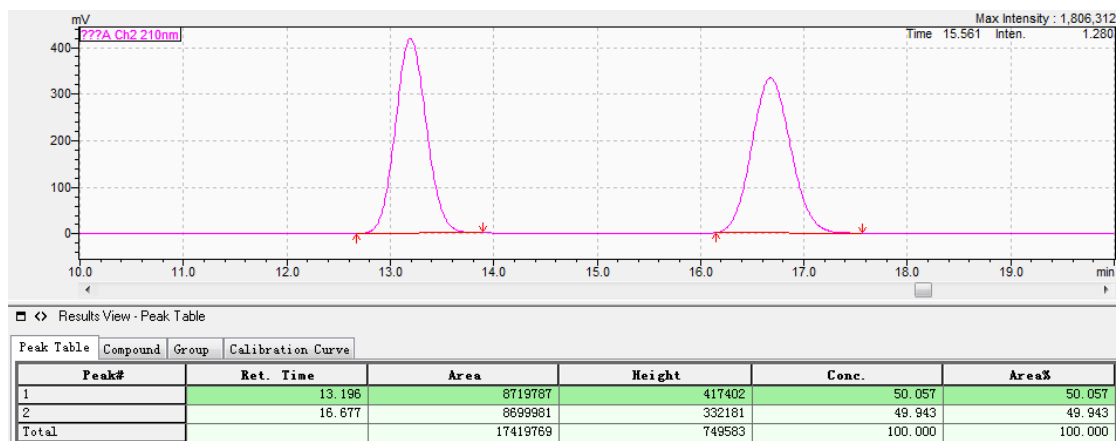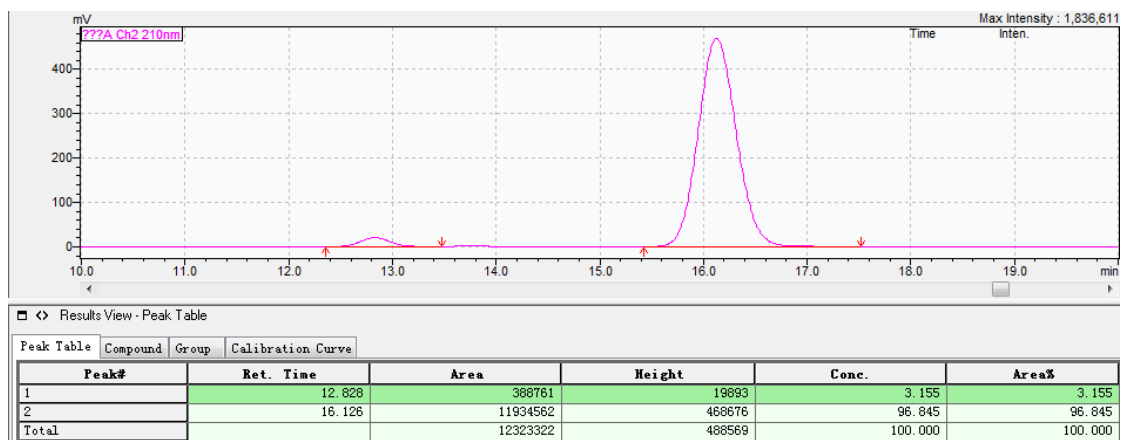

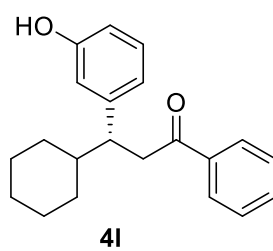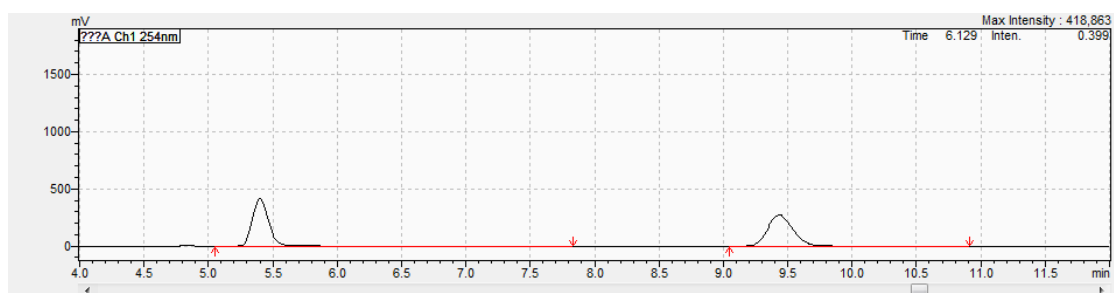

Results View - Peak Table

Peak Table Compound Group Calibration Curve

| Peak# | Ret. Time | Area    | Height | Conc.   | Area%   |
|-------|-----------|---------|--------|---------|---------|
| 1     | 5.400     | 3734400 | 419776 | 50.415  | 50.415  |
| 2     | 9.434     | 3672851 | 271263 | 49.585  | 49.585  |
| Total |           | 7407251 | 691039 | 100.000 | 100.000 |

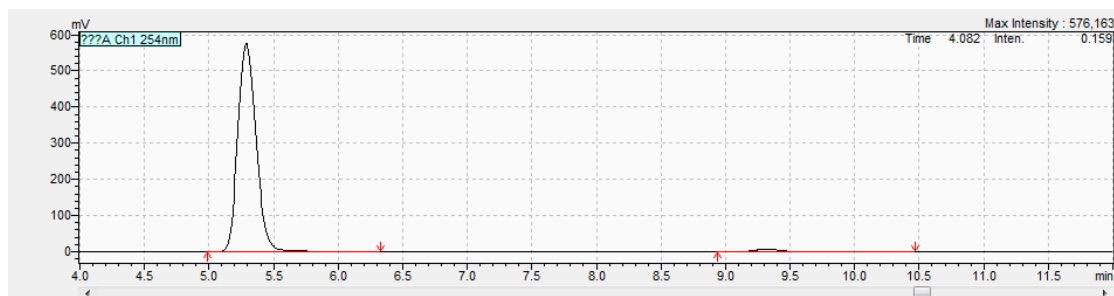

Results View - Peak Table

Peak Table Compound Group Calibration Curve

| Peak# | Ret. Time | Area    | Height | Conc.   | Area%   |
|-------|-----------|---------|--------|---------|---------|
| 1     | 5.289     | 5693977 | 576286 | 98.271  | 98.271  |
| 2     | 9.322     | 100202  | 7277   | 1.729   | 1.729   |
| Total |           | 5794179 | 583563 | 100.000 | 100.000 |

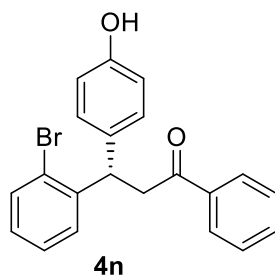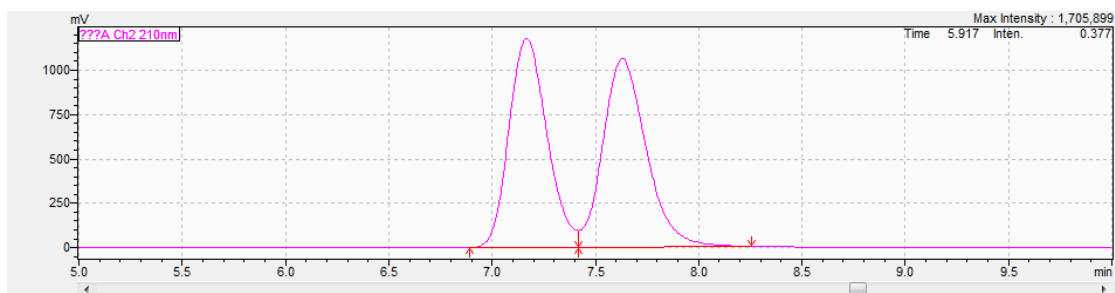

Results View - Peak Table

Peak Table Compound Group Calibration Curve

| Peak# | Ret. Time | Area     | Height  | Conc.   | Area%   |
|-------|-----------|----------|---------|---------|---------|
| 1     | 7.167     | 15065686 | 1177517 | 49.354  | 49.354  |
| 2     | 7.630     | 15459968 | 1060328 | 50.646  | 50.646  |
| Total |           | 30525653 | 2237844 | 100.000 | 100.000 |

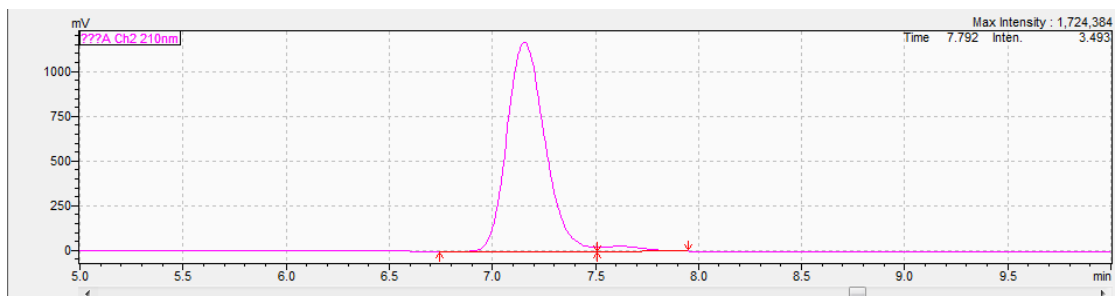

Results View - Peak Table

Peak Table Compound Group Calibration Curve

| Peak# | Ret. Time | Area     | Height  | Conc.   | Area%   |
|-------|-----------|----------|---------|---------|---------|
| 1     | 7.155     | 14905483 | 1167571 | 97.506  | 97.506  |
| 2     | 7.621     | 381304   | 27543   | 2.494   | 2.494   |
| Total |           | 15286787 | 1195115 | 100.000 | 100.000 |

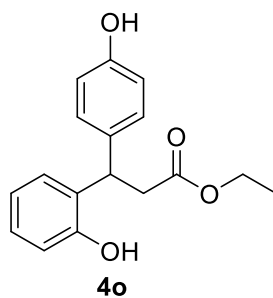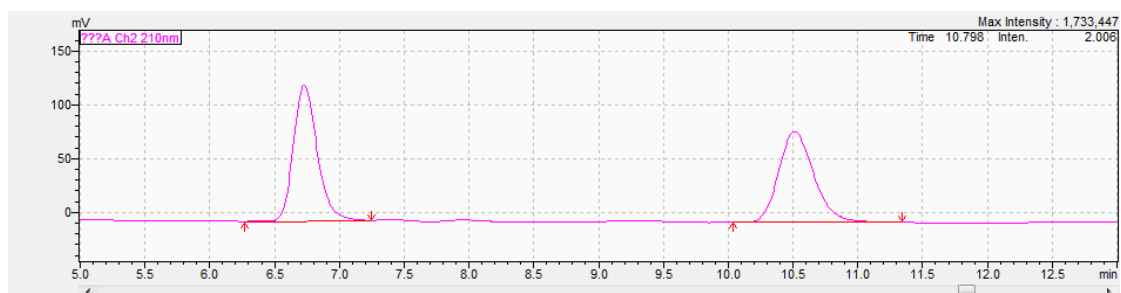

Results View - Peak Table

Peak Table Compound Group Calibration Curve

| Peak# | Ret. Time | Area    | Height | Conc.   | Area%   |
|-------|-----------|---------|--------|---------|---------|
| 1     | 6.728     | 1843388 | 126858 | 50.697  | 50.697  |
| 2     | 10.513    | 1598169 | 84385  | 49.303  | 49.303  |
| Total |           | 3241558 | 211243 | 100.000 | 100.000 |

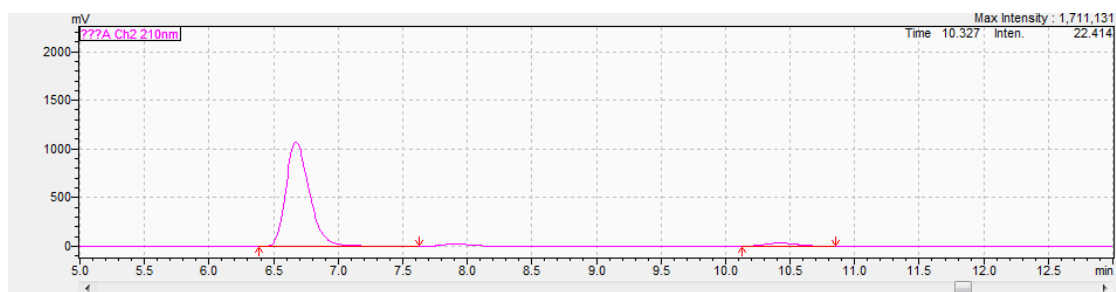

Results View - Peak Table

Peak Table Compound Group Calibration Curve

| Peak# | Ret. Time | Area     | Height  | Conc.   | Area%   |
|-------|-----------|----------|---------|---------|---------|
| 1     | 6.674     | 13588468 | 1070234 | 95.937  | 95.937  |
| 2     | 10.423    | 575436   | 31945   | 4.063   | 4.063   |
| Total |           | 14161903 | 1102179 | 100.000 | 100.000 |

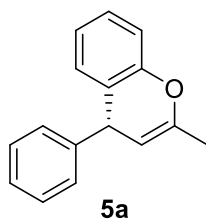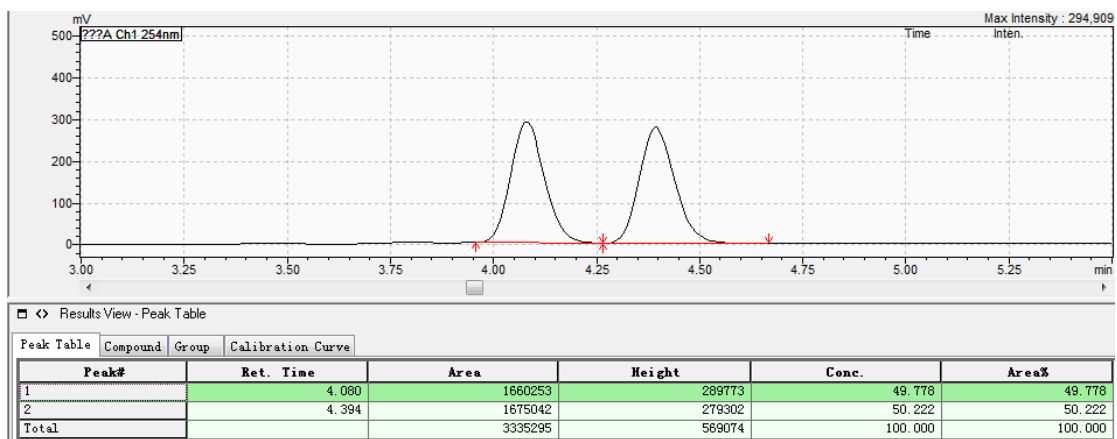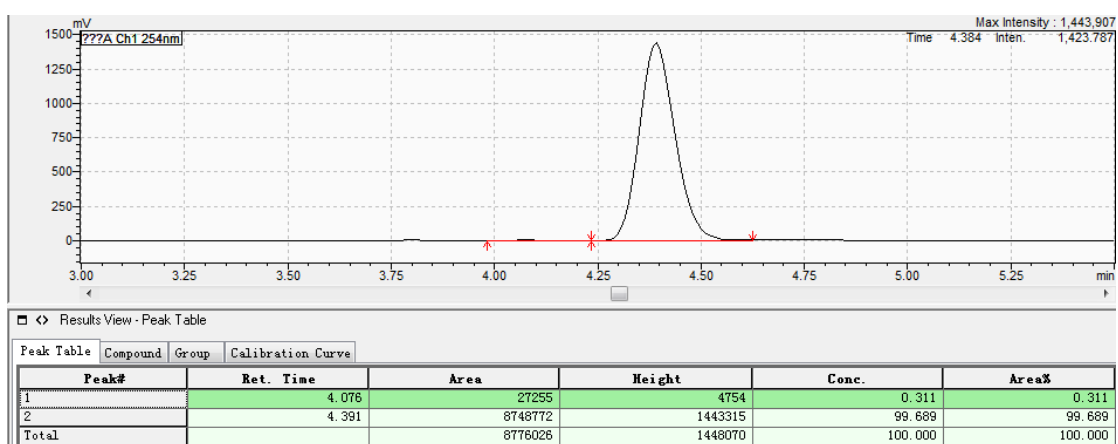

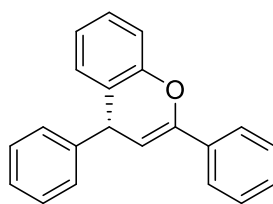

5b

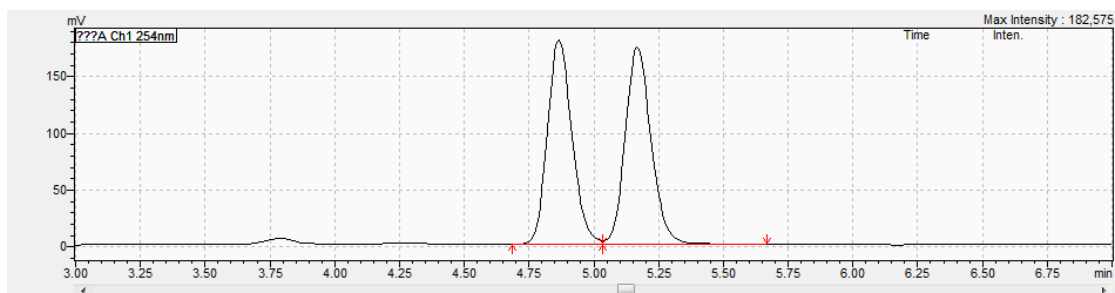

Results View - Peak Table

| Peak# | Ret. Time | Area    | Height | Conc.   | Area%   |
|-------|-----------|---------|--------|---------|---------|
| 1     | 4.865     | 1184867 | 179695 | 49.775  | 49.775  |
| 2     | 5.188     | 1195595 | 173671 | 50.225  | 50.225  |
| Total |           | 2380462 | 353366 | 100.000 | 100.000 |

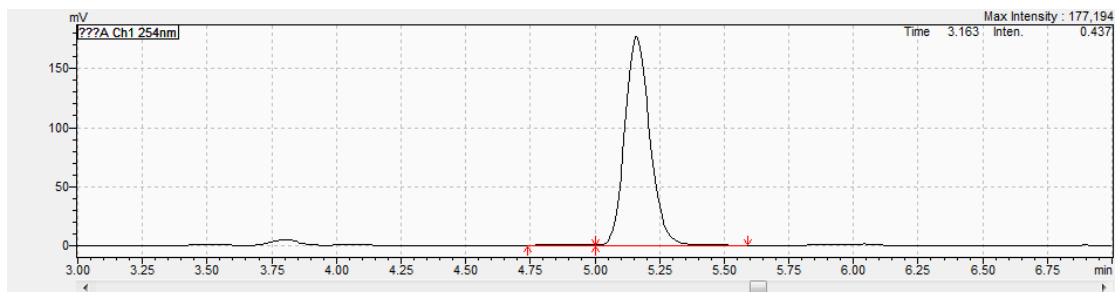

Results View - Peak Table

| Peak# | Ret. Time | Area    | Height | Conc.   | Area%   |
|-------|-----------|---------|--------|---------|---------|
| 1     | 4.864     | 7117    | 873    | 0.597   | 0.597   |
| 2     | 5.181     | 1184944 | 176667 | 99.403  | 99.403  |
| Total |           | 1192061 | 177540 | 100.000 | 100.000 |

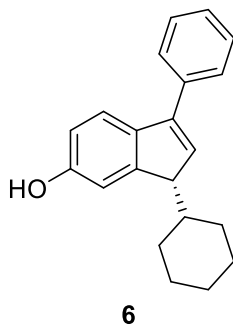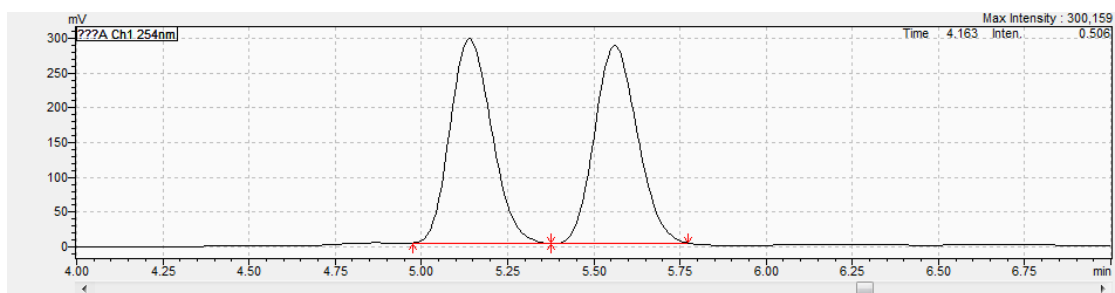

Results View - Peak Table

| Peak# | Ret. Time | Area    | Height | Conc.   | Area%   |
|-------|-----------|---------|--------|---------|---------|
| 1     | 5.140     | 2466703 | 294778 | 50.026  | 50.026  |
| 2     | 5.561     | 2464169 | 284166 | 49.974  | 49.974  |
| Total |           | 4930871 | 578945 | 100.000 | 100.000 |

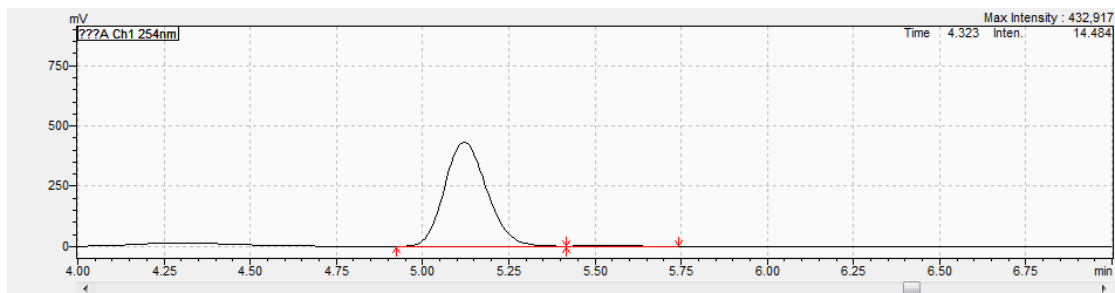

Results View - Peak Table

| Peak# | Ret. Time | Area    | Height | Conc.   | Area%   |
|-------|-----------|---------|--------|---------|---------|
| 1     | 5.121     | 3695829 | 432045 | 98.678  | 98.678  |
| 2     | 5.538     | 49529   | 5516   | 1.322   | 1.322   |
| Total |           | 3745358 | 437561 | 100.000 | 100.000 |

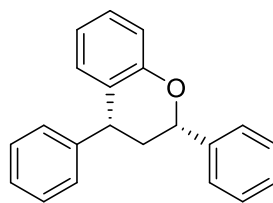

7

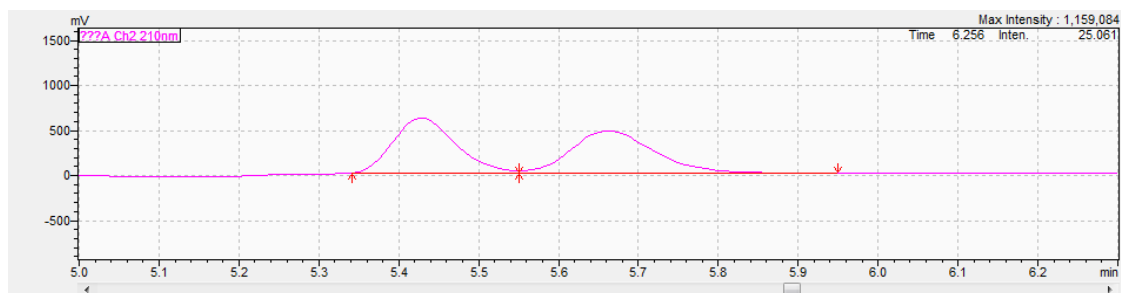

Results View - Peak Table

Peak Table Compound Group Calibration Curve

| Peak# | Ret. Time | Area    | Height  | Conc.   | Area%   |
|-------|-----------|---------|---------|---------|---------|
| 1     | 5.428     | 3287672 | 609386  | 49.599  | 49.599  |
| 2     | 5.661     | 3340897 | 471496  | 50.401  | 50.401  |
| Total |           | 6628569 | 1080882 | 100.000 | 100.000 |

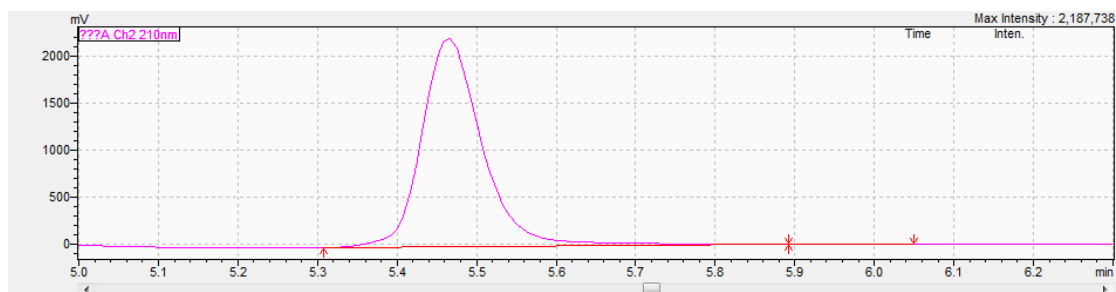

Results View - Peak Table

Peak Table Compound Group Calibration Curve

| Peak# | Ret. Time | Area     | Height  | Conc.   | Area%   |
|-------|-----------|----------|---------|---------|---------|
| 1     | 5.465     | 11708679 | 2217827 | 99.981  | 99.981  |
| 2     | 5.910     | 2188     | 450     | 0.019   | 0.019   |
| Total |           | 11710867 | 2218277 | 100.000 | 100.000 |

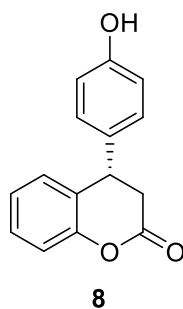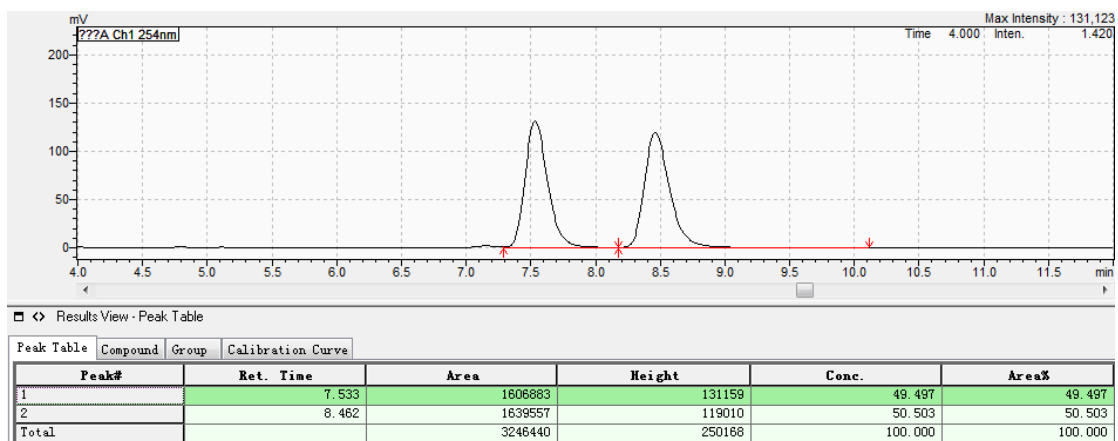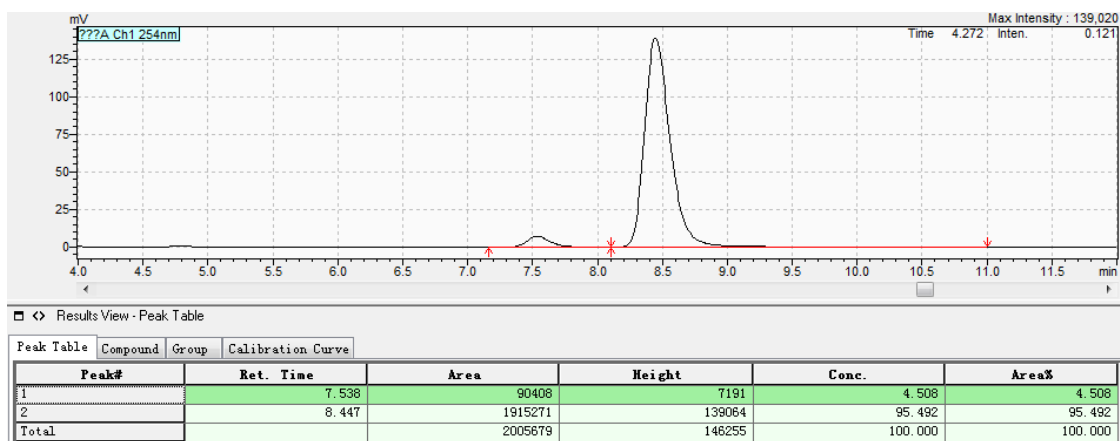

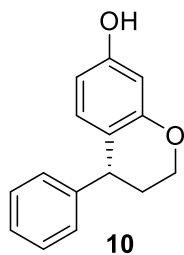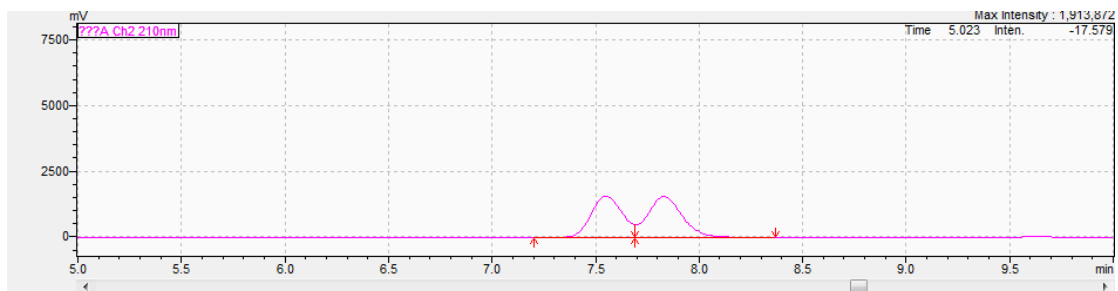

Results View - Peak Table

| Peak# | Ret. Time | Area     | Height  | Conc.   | Area%   |
|-------|-----------|----------|---------|---------|---------|
| 1     | 7.549     | 16477759 | 1565283 | 48.088  | 48.088  |
| 2     | 7.830     | 17787981 | 1544398 | 51.912  | 51.912  |
| Total |           | 34265740 | 3109681 | 100.000 | 100.000 |

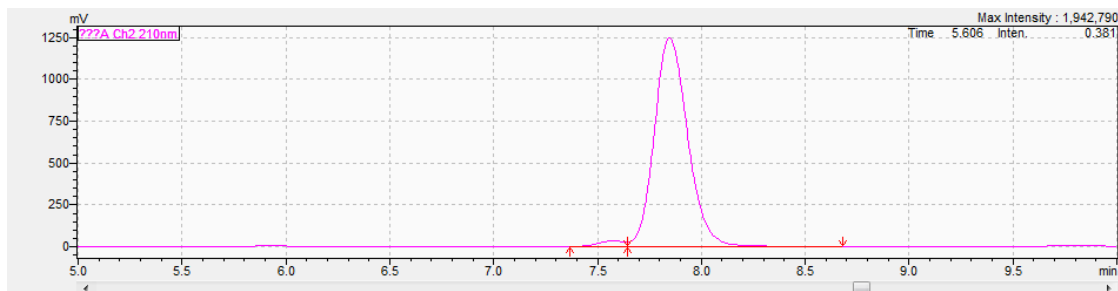

Results View - Peak Table

| Peak# | Ret. Time | Area     | Height  | Conc.   | Area%   |
|-------|-----------|----------|---------|---------|---------|
| 1     | 7.574     | 287918   | 32644   | 2.031   | 2.031   |
| 2     | 7.848     | 13685675 | 1247455 | 97.969  | 97.969  |
| Total |           | 14173593 | 1280099 | 100.000 | 100.000 |

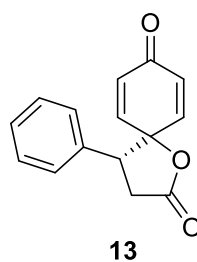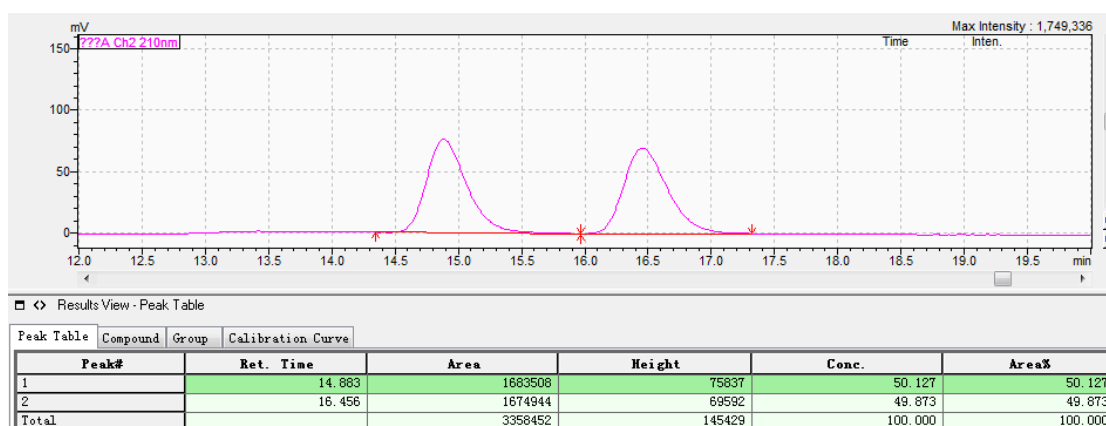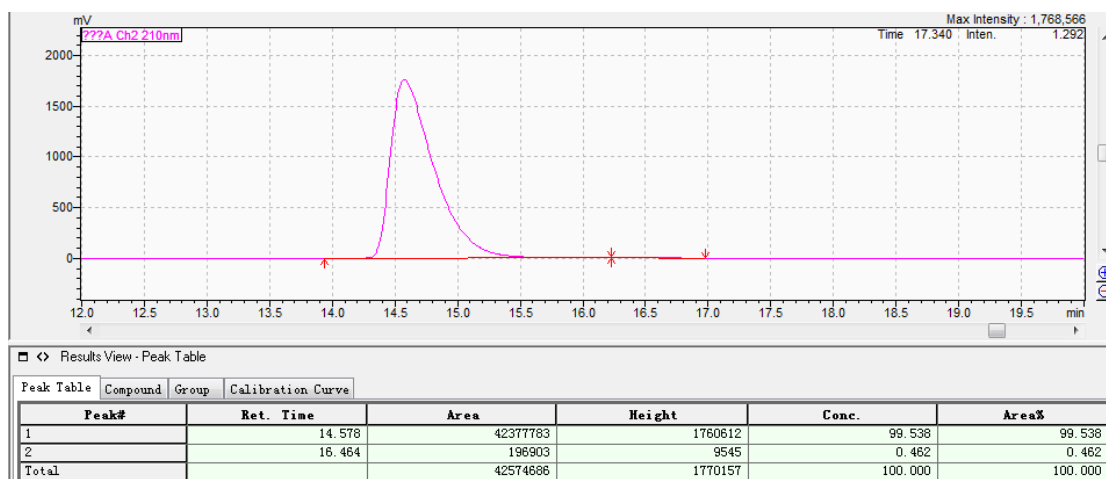

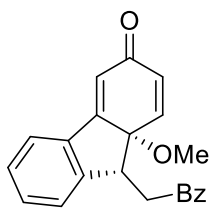

15

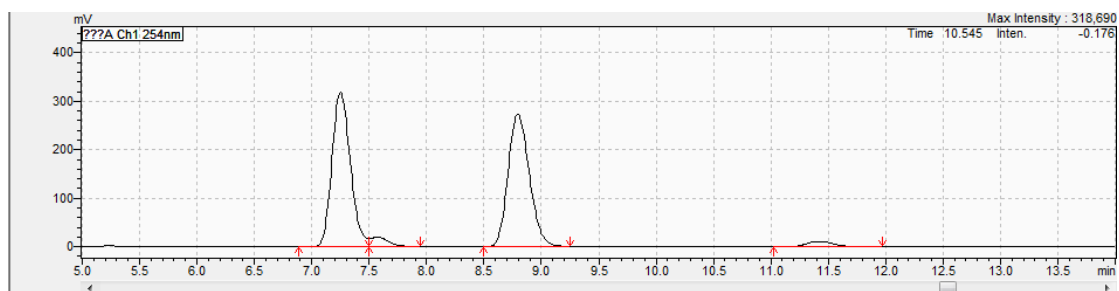

Results View - Peak Table

Peak Table Compound Group Calibration Curve

| Peak# | Ret. Time | Area    | Height | Conc.   | Area%   |
|-------|-----------|---------|--------|---------|---------|
| 1     | 7.251     | 3560847 | 318582 | 47.670  | 47.670  |
| 2     | 7.572     | 204982  | 19223  | 2.744   | 2.744   |
| 3     | 8.795     | 3523329 | 272862 | 47.168  | 47.168  |
| 4     | 11.419    | 180598  | 11289  | 2.418   | 2.418   |
| Total |           | 7469756 | 621936 | 100.000 | 100.000 |

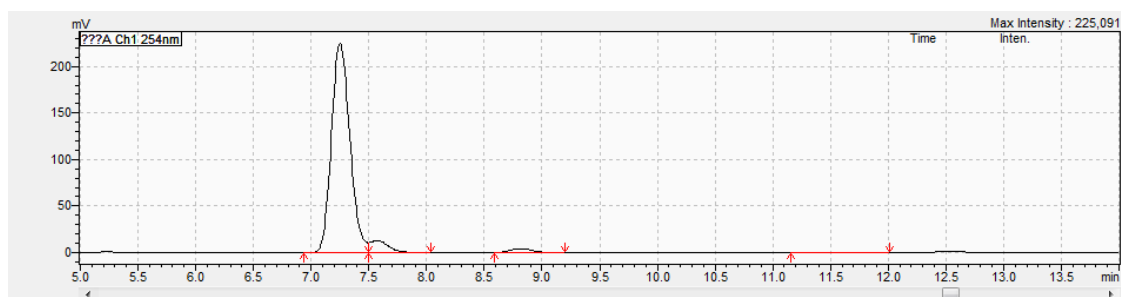

Results View - Peak Table

Peak Table Compound Group Calibration Curve

| Peak# | Ret. Time | Area    | Height | Conc.   | Area%   |
|-------|-----------|---------|--------|---------|---------|
| 1     | 7.251     | 2498875 | 225044 | 92.836  | 92.836  |
| 2     | 7.574     | 135531  | 12825  | 5.035   | 5.035   |
| 3     | 8.813     | 53307   | 4239   | 1.980   | 1.980   |
| 4     | 11.399    | 3994    | 192    | 0.148   | 0.148   |
| Total |           | 2691707 | 242300 | 100.000 | 100.000 |

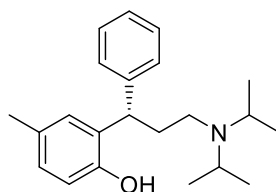

(S)-Tolterodine

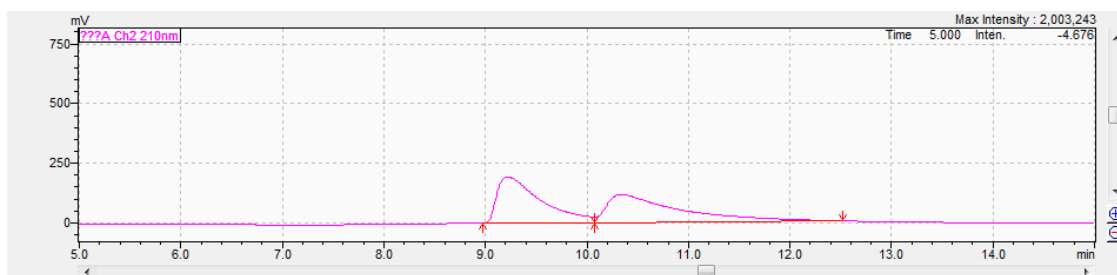

Results View - Peak Table

| Peak# | Ret. Time | Area     | Height | Conc.   | Area%   |
|-------|-----------|----------|--------|---------|---------|
| 1     | 9.220     | 5815873  | 193375 | 50.361  | 50.361  |
| 2     | 10.339    | 5732603  | 117351 | 49.639  | 49.639  |
| Total |           | 11548476 | 310726 | 100.000 | 100.000 |

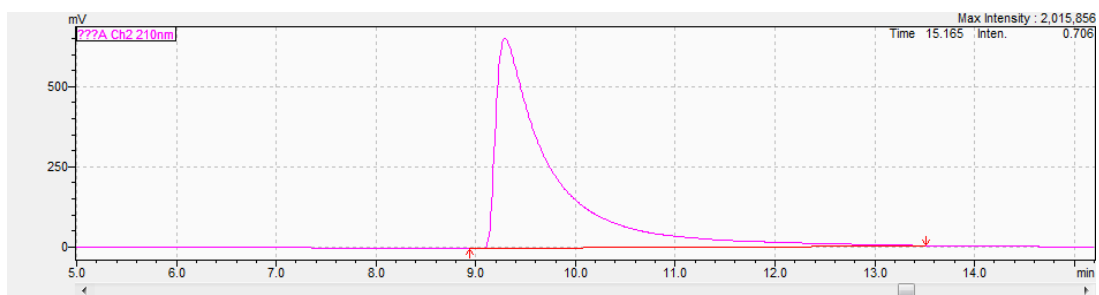

Results View - Peak Table

| Peak# | Ret. Time | Area     | Height | Conc.   | Area%   |
|-------|-----------|----------|--------|---------|---------|
| 1     | 9.295     | 25170914 | 654605 | 100.000 | 100.000 |
| Total |           | 25170914 | 654605 | 100.000 | 100.000 |

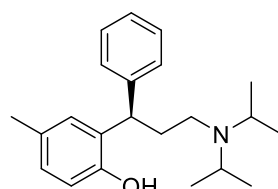

(R)-Tolterodine

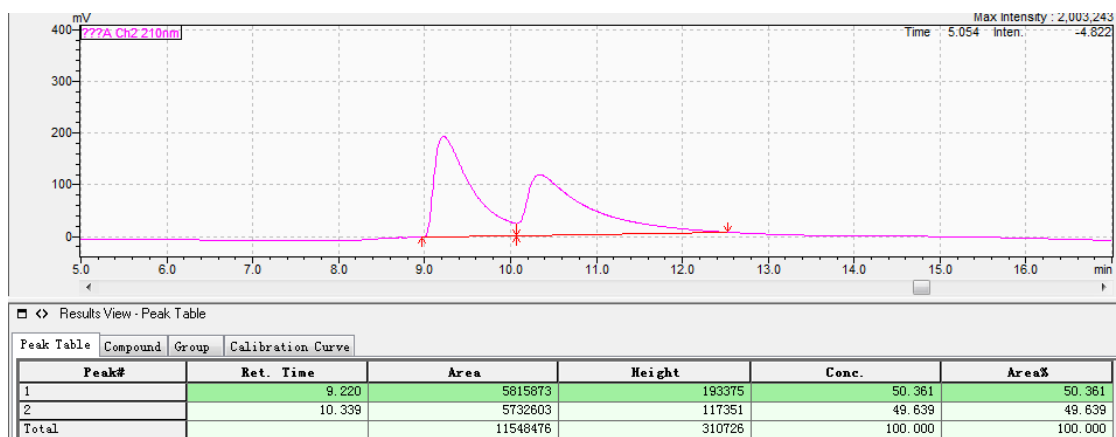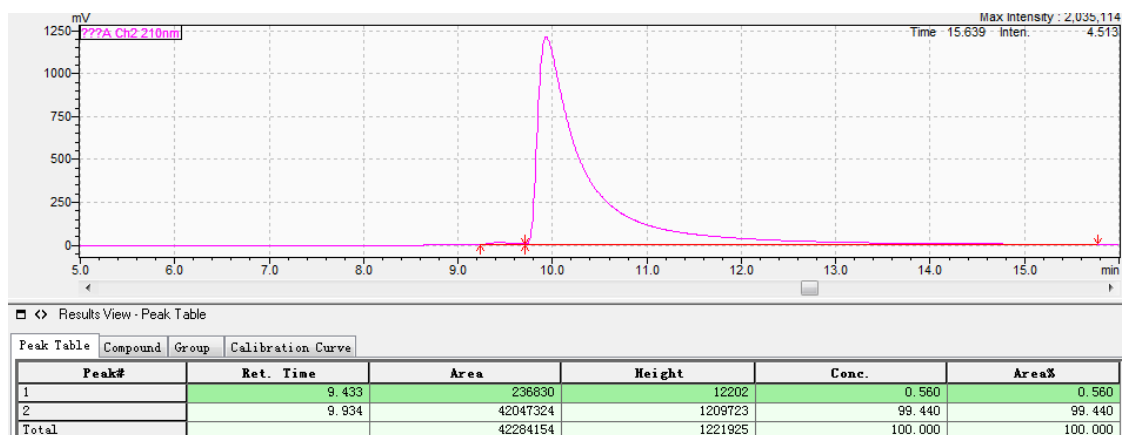

Supplement: c9gc02420d1.pdf [file c9gc02420d1.pdf]
